# Supplementary material for: Transcriptome-wide identification of MAPKKK genes in bermudagrass (Cynodon dactylon L.) and their potential roles in low temperature stress responses
Source: PeerJ. 2020 Oct 28;8:e10159. doi: 10.7717/peerj.10159 (PMC7602684; doi:10.7717/peerj.10159)
Supplement: Supplemental Information 6 [file peerj-08-10159-s006.xlsx]

## Sheet: Table S1
Table S1 Protein sequence information of MAPKKKs in bermudagrass.
MAPKKKs	Subfamily Gene IDs	Protein Sequece
CdMAPKKK1	CdMEKK1	MLAQLFWQPSRGSPECSPIPSPRMTSPGPSSRVHSGSVSPLHPRSGGMGP ESPTSRHDDVKKKQTHKLPLPPLNISNSSFFPNNSTPTSPISVPRSPGRS ENLPSPASRWKKGKLIGRGTFGHVYVGFNSDSGEMCAMKEVTLFSDDSKS KESAKQLGQEISLLSRLRHPNIVQYYGSDTVDNKLYIYLEYVSGGSIHKL LQEYGQLGEPAIRSYTQQILSGLAYLHAKNTVHRDIKGANILVDPSGRVK LADFGMAKHVNGQHCPFSFKGSPYWMAPEVIKNANGCNLAVDIWSLGCTV LEMATSKPPWSQYEGIAAVFKIGNSKELPPIPDHLSEHCKDFIRKCLQRD PSQRPTAVELLQHPFIQNGSQLEKSVAPDPLQHLAAISCRSN…
CdMAPKKK2	CdMEKK2	MLAQLFWQPSRGSPECSPIPSPRMTSPGPSSRVHSGSVSPLHPRAGGVAP ESPTTRHAEGKKKQTHRLPLPPLSISNNSTYLQNNSTPTSPISRSPGRTE NPPSPGSRWKKGKLIGRGTFGHVYAGFNNDKGKMCAMKEVTLFSDDPKSK ESARQLGQEISLLSRLQHPNIVRYYGSETVDDKLYIYLEYVSGGSIHKLL QEYGQFGEQAIRSYTKQILMGLAYLHAKNTVHRDIKGANILVDPNGRVKL ADFGMAKHINGQQCPFSFKGSPYWMAPEVIKNSSGCNLAVDIWSLGCTVL EMATSKPPWSQYEGIAAMFKIGNSKELPPIPDHLSEEGKEFIRLCLQRDP SSRPTALDLLQHPFVRNASVLEKSIASNPLGQLAAISIKPDS…
CdMAPKKK3	CdMEKK3	MPAWWPNKLRSKSKAKPGAAAVSASSSPRNSADLGSPSPTPTPRSKEKGRSFDSPAAAAP RGRAAHGAVGYKLPVPVSEPEPDPLPVGSLYEDVAAAHGDGCSSASESSACSLVSLDESH DQHGGYRSVDPVAFARGRNTPSTSDRILNEDKHFMSCSMPREHKKFFEVPVSSVREHHLH SDEPSTSETSCSRGRMLSEDIFGPRTRSLSPGPKCNVFALNNGNSREFGFSPRSPVRKID GLRSPPHPLPLPPAPSGSPHPPTPGPCSPLPSSPSSCSPLPSSPTTCSQSQSQWKKGKLL GSGTFGQVYLGFNSENGQFCAIKEVQVIMDDPHSKERLKQLNQEIDMLMQLSHPNIVQYY GSELADEALSIYLEYVSGGSIHKLLREYGPFKE…
CdMAPKKK4	CdMEKK4	MGPPHAAQDSASSSPSGSGSSRRRFRRLDRRNASKNIGYDAANFCSYPPSPTPSSAPASA SKACSLDLLSSFRIGGSGDGGGDLRLLCQSLGLSGPDDFAIPIADWEAHKAGRNSSASSS PSSARTSTPARDSPLRREGADPGPPAKEPAAREAPIEAPERPPQLDRLEPVRLEVKRAAG EGGIKGVRPPPVLKPPPSMAMPAVCGAGSAWDILASFAPDEKEHAPASRSGGSLVRQEEE EDEDAAVLLTLEELRLGETSEDFTGTSSLSTINDDETSSTTTESMFYVSPNGRFRRKILS WNRGMLLGSGSFGTVYEGISDEGVFFAVKEVSLYDQGSNAKQCIFQLEQEIALLSQFEHE NIVQYYGTDKEDSKLYIFLELVTQGSLATLYQK…
CdMAPKKK5	CdMEKK5	MCAIKEVKVISDDSNSKECLRQLNQEIVLLSQLSHPNIVQYYGSDLSNETLSVYLEYVSG GSIHKLLQEYGPFGEAVLRNYTAQILSGLAYLHGRNTVHRDIKGANILVDPNGDIKLADF GMAKHISAYTSIKSFKGSPYWMAPEVIMNSNGYSLSVDIWSLGCTILEMATAKPPWSQYE GVAAIFKIGNSKDIPDIPDHLSSDAKSFLKLCLQRDPAARPTAAKLMDHPFVKDHAAFRG SRSSMTRDPFGISNDGKNSKVQTNVGISSYRSLSPLRDPDVVTRNLTGPTSPIPSMTNRR ISAINPSNVRMNMSLPVSPCSSPLRQYRQSNRSCLPSPPHPAYSAGAANYSPINNALYPT RASRGLPDPWLEISQLKTQTFDSPRR
CdMAPKKK6	CdMEKK6	MAAPHRPRPRPRPQLARINAMRHSHSADEEDNEAPAAAELGAEFAAQTSFRIRGGRGAEV ADLFRKLGLNGPEDFTIPPAVYAAAMAHIPNSARRRGQSLELGSGVEGSAPPELPETSGR DVTVATRLEAADVGKAAAVLATEVVQLQPEKVIGISARSYRRGSGTESSSRVVELDTAGA SRREEVAAEVKQGTAYEEKGKSVAAKVDRLRVERTEAVVLETIGETTGAVVQVAAESTSR GVEHYYFSPSPHRRIKRTITSWIKGQHLGSGSFGSVYEAISDDGFFFAVKEVSLVDQGLN AKQRIQQLEHEISLLSRLEHENIVQYFGTDKEDGKLYIFLELVTQGSLAALYQKYHLQDS QVSAYTRQILYGLHYLHQRNVLHRDVKCANILV…
CdMAPKKK7	CdMEKK7	MGAVITGDWQRGPVIGRGASATVSIAADRSTGHVFAVKSVDAARAGVLRREQSVLSALGS SPFVVSCLGSGVSADGTCFDLFLEYAPGGSLADEVRRREGHEKEEAWVRARAADVLRGLA HAHAGGVAHCDVKARNVLIGADGRAMLADFGCARWMETEKGDAGNVGAGIRGTPAFMAPE AARGEAQGAAADVWALGCTVIEMSMGAAPWTDRFADPVAALHHVAHSGGVPETPAWLSDE GKDFLGRCLVRDPAKRWTAEQLLRHPFVADSSSDPPAAVGKGAPIEQRVSPKSILDQGFW EASELDSSATDYSDTALTPADRVRALAGGVAPELDWTWISGDEEHWITVFTADIVAPPPE SDASAPQFDAEELFEAEAGSSPAAASEEPHIGG…
CdMAPKKK8	CdMEKK8	MDMEWLRGKCIGKGSFGTVHLAVDRATGRAFAVKSVDAKAAPAAALACLESEISILRRLC SPYVVAYLGDGASGTTTRDLHMELLPGGSAAEAAAARSGLGERAARGVLRRVAAALRYLH DDAGVIHGDVKGRNVLLGDVDDCGGAKLADFGAATMLVSDDVLPRGPRGTPAWMAPEVAR GGSATPASDVWSLGCTALELLTGKRPWSELGGAVAEVGELLFLVGFGGTRPTVPSHLSDA CRDFLDKCLRRDAGQRWTCDQLLRHPFLSTSSDADFDAGEPSPYPSPRAVLDWGALSDSD SEAPVDDQLEELEGEEAMARAKGRVAELAASNWPRAGWGKLDWGTSSATWAADTCAPSPI SEAPRAVVPMAPSTSNSDAGNGNAGWPASSSAA…
CdMAPKKK9	CdMEKK9	MHRDIKGANLLVNVYGVVKLADFGMAKHLSTAAPNLSLKGTPYWMAPEMV QATLMKDTGYDLAVDIWSLGCTIIEMFDGKPPWSDLEGPAAMFKVLHKDP PIPENLSHEGKEFLQCCFNRNPAERPTASELLDHPFIRNSSHYNKHGSIH SFAGIKVNDNGHSSRDKTSSKSDPCFKGKTTTGFGPQFGFDSKFRECYVF SNGKPSS
CdMAPKKK10	CdMEKK10	MEHVHPGSVYKYAHEHCGSLTGSIINSFMNHILKGLAFLHSQKIMHGNIR CSNLLVDVNGVVKLTDFGIAKLLATAAPNHSLTTAYWAAPEVVRSTLDKS CISYDLLAADIWSIGCTIIEMFTGKAPWSDLEGPAAIFKVLCKDPPIPDN LSPEGKDFLRCCFKRYPADRPTASVLLEHPFIRKSFEVTKSAGSKSGAGD EIPSKNDLYLRTHENIDPGSARASRSLVSGAQRLPQPEMSSE
CdMAPKKK11	CdMEKK11	MDSGVAKQLRRIRTLGRGASGAVVWLASDEASGELLAVKSAPAAVAAQLR REGRVMEGLSSPHIVPCLGARAAAGGEYQLFLEFAPGGSLADEAARSGGR LPEDEIRAYVGDIAHALAYLHGLSLVHGDVKARNVVIGADGRARLTDFGC ARPAESTRPIGGTPAFMAP
CdMAPKKK12	CdMEKK12	MAAPVEVSAGHWTTLRTLGRGASGAVVFLAADATSGELFAVKSARAPSAAAAALRRERDV MAGLSSPHVLRCIGASEDLDGGSYSLFLEYAPGGSLADVAARNGGRLDERAVRAYAGDVA RGLAYLHARSIVHGDVKPRNVVIGADGRAKLADFGCARPVAESSLPIGGTPAFMAPEVAR
CdMAPKKK13	CdMEKK13	MAPEVIVGSGHSFSADIWSVGCTVIEMATGKPPWSQHYQEVALLFHVGTT KSHPPIPEHLSPEAKDFLLKCLQKEPELRSTASDLLQHPFVTGESDNLQP VNRAAHKETSVDKIPGHDMPNGLGLNYSSNWS
CdMAPKKK14	CdRAF1	MEPRKDVRSAAQSAMREPSSSAYGSSAVPEYATGGTVKPVLNYSIQTGEEFALEFMRDRA IPKKNVVPGMSQDQHGTSGAAHKDTRGSIGAHRARAETRFDGAIFLTSENQETDAVERKQ SFENENRSRYMSTMSVPRVPSGGGSSHGLSVGYASSDVSDTSRRLKILCSFGGKILPRPS DGKLRYVGGETRIIRISRNISWQELKLKTTAFYSQPHVIKYQLPGEDLDALISVSNDEDL RNMMDECGFLESGDGSQKLRIFLVSSIEFDDMSFSLGSMDSDSGIQYVAAINGMDGGAAK PSSGHGLANTSMNEFEQFINLNVDSGQASLSRDSSSLHPVNASNFVPPAVLSRPIAPDLS GGTTADLHSYPSHGMQHLVSDHSFPTSSEKLYD…
CdMAPKKK15	CdRAF2	MASRVAAGVGDPSSPSARSWGEENESSGHGKVKLMCSFGGRIAPRPGDGALRYVGGQTRL ISVPRTASFGELLRKVEAVDEAAAASGGVLVRYQLPGEDLDSLISVSGPEDFDNMMEEYE KLAAAAAPDGSAKLRVFLFPACGTEGSGSASHLTAADESGQRYIDAINCVSAEAAVRRKD SVASAGSSAHNSEASEYNGLAEGMSPRSGPPPASIPSEFSYSAGAHYHNAFPESVGFSAL AVSSAPAMGIPAQSPILVRTEPSALQPQPVAAAYATSHQPPPQVAYAPPSQQPQVTTYVP QQQQQPQVASYVQQIPQSHIDPQQVQYINAQQLNVHGVPQSVNYVPVQMGQFVPNIPVTN SMATTVAQVGTMRPPVSAGAETVLDNMHFTRPV…
CdMAPKKK16	CdRAF3	MAPAAAPVGGTEAEGAPRMVKFLCSFGGRILPRPLDGCLRYVGGETRIVMLPRDISYADL AARMRELYKEADIIKYQQPDEDLDALVSVVNDDDVVNMMEEYDKVIASGEAFTRLRIFLF SQLLDDDAASAAVHYNVDDRETERRYVDALNSLGDVRSPSSPVSVEQLFGIGGNESGIPD IAGLRHLNVPRPSHSQRYGEVDSPWSPAYVSPSQYGVHDPRDFPISPSSARFQVGAEDFD ERIPDDFLRHSPKYRLYEAAHSPSHIDNLVWLPPGAVVQQNAGFPGNLGRPNNILDGSTG CDHCCSPFQKGQDSVADPRYIDPRWTRPVQPHYDQPSMTNEYPGHPANSCPNCCRPCDHY VGGQDVRLDNGVYVKEQNGGHAPMFYNEPHSHE…
CdMAPKKK17	CdRAF4	MAATAGAAEDGGGGGGGGGEKMKLLCSLGGRILPRPGDGTLRYAGGDTRIVSVPRGVALP DLLARLSEAYGGATGPHFAVKYQLPDEGLDALISVSSPEDLDNMVEEYDKLGGASPKLRV FIFPILDASGGSGVGGEDLEGGSFDAGLRYLEAVNGIVRKDSIASVSSAQYSDAGLPHPA SSAGGAPGSPTVLSPTSTCSNDAARSVFSGTAPPPLVDVFSNAAPAPVPVKPQESAPEGR APTPPANQHPQPHLHPQPHPEAARYRQPLSQLPPLPPVFMNDHRDAMQGLNQQHPGNGAR FDDCNMCLKALPHAHSDPVVNEYGNEVQGGAAPDPGPVFMSLRPEDVAKIMMPGRAVQTP MGAYGYTHMHQVPQDRVYVPKVEGVPNPVFIDQ…
CdMAPKKK18	CdRAF5	MKNLFKSKIRWQHRSNEPPAAPAGQQQPSASASPATSPSGAGEAPALSVSTGSSSSPSAA TTPAGGAAAPAAAGAGGGGGEDYMLSEEEFQMQLAMALSASNSDCVGDLDGEQIRKAKLM SLDRHATHRDEGHTADSLSRRYWDYNFLDYHEKVIDGFYDIFGSSMESSRQGKMPSLADL QTGIGDLGFEVIVINRAIDSTLQEMEQVAQCIVLDFPVANIALLVQRIAELVTDNMGGPV KDANEMLTRWLEKSTELRTSLQTSLLPIGCIKIGLSRHRALLFKILADRVGIPCKLVKGS NYTGGDDDDAINIIKMDNEREFLVDLMAAPGTLIPADVLSGRGNSLKSNRKIGLDQTAGT SSIIDANLDPSALHLDPKGGRLPVFSSGDWISD…
CdMAPKKK19	CdRAF6	MDETPTSSGQSEGSSCEPSWWPPDLLGKVESATISRKHEVLGAGRSSSWKASQLLWSTGT YSGLIPNGFYSIIPDKKLKETFPTIPSLDDLQTLEADGLKADIIIVDTERDKKVFMLKQL SGALVKGLNSSPALVIKKIAGLVFDCFKRQNPDASPARGSTEDNHFFGNRGPQLLGQIKH GSCRPRAILFKVLADAVGLESKLVVGLPDDRAVGFVDSYKHMSVVVSLNSMELLVDLMRF PGQLIPFSAKAIFISHISAAGESDSAENDSCDSPLEPNSPLYGLSDKVEAEGIESSSNLS GRSLRNMMLRSRTFSEGKLSTSCSEPNIANAFWRHSQRRGVAEEPRGASSSPEHPLMRAR GRSILGGEKNSFQEYAENAVASRSEGLGGSSTP…
CdMAPKKK20	CdRAF7	MNNQVGYNNQINSNGLSRLDPGNLSGTGLPLKCAMDPINSLRLRTVPSENGLRPVESSSD NLQDMACESPHTGKVKFMCSFGGKILPRPSDGRLRYVGGETRLISITKGFSWRELLQKTL KICNQPHIIKYQLPDEDLDALISLSCEEDLQNMMEEYYNLEKANGSPRLRIFLVSLSECE DTPLDSRSLESEPEYQFVAAVNNIVQLSRSISGNNLMNQSGHQLDSSPLPNRDSPVCKTK TEIGVKASVGTGLNNESSSQFFLDPHTEPVVIESSTTSSPSFSQHRTVKQSRMRVPADKS TMNQEHVNRSEFSDGSIQKTMLPDHQDKKQKDADMNIGAGSHMHPPHIQRQVKGMARNES DISTPVEASIRFEKVSLHPENAIWGSGLHEHNS…
CdMAPKKK21	CdRAF8	MTRMKHLLRKLHLAGAGGGGGAGAAPEHHRPGHRRSPPVVAAAEPPPAPVAAAAVEVPVP VAAAAEEEPPKGLGAEAATTRLEEDYQVRLALAISASDHAGLVDADSVQIRAAERISLGA GDRAHHVEALAARYWNHSVVGYEEVLADGFYDLCGARTHPGFQARFPSLDYLGAVSAAGD ASFLAILVNRGRDPALRRLEDRAAAVAAQSRARHGGAASADLVQRIAGLVVDAMGGPVED ADSMNREWSLKSRQLSLQLNSVVLPLGSIRVGLSRHRSLLFKVLADRVNLPCKLVKGIYY TGTDEGAVNLVKIDFDSTEYIVDLMGAPGTLIPSDISGSQFQDSNDTQLNSDAIEESVAE LCLALEQINRDDIEGSSSDHCSDLTLATSQLEN…
CdMAPKKK22	CdRAF9	MESSGEELLKKIRELEVGQAQLKQEMSKLMPSAGERRRSQSVSPRRGVPVPPPPPAKTKP PGRRLSGGFEGGPRAWSRGSASFPHSSPLQREGRATGAGDAGTSSPLPERQYSRVLQSLG QSVHILDLHGRIIYWNRSAENLFGYPASEALGQDALMLLVDSRDHNVVNDIFQRISMGES WTGKFPVKNRAGDRFSAVATNTPFYDEDGSLVGIICVSSDSRHLEEIFCRPPTSSRPPLD SSRTHCDGSCSSNSRKSSLLSRSPFDSQQPLQTTLASKITNLATKVTNKVRSRVRTDENG FEREGGSGESQCSDRGAKEEPTSSGATTPRGDAPRGAFYMEESSPGKPTNTNSDESEGKV GLHKILSSKAEALLTKKGISWPWKGREDEGPDE…
CdMAPKKK23	CdRAF10	MAVEEAAESCGSHAAAAGGGGGGAAAASGPATSSSSAGAAAQARKQQQQQRHKLEVYTEV LRRLHDSGMPEARAPGFDDDLWSHFNRLPARYAMDVNVERADDVLTHKRLLEQARDPAQR PAFAVRAVQVSPILDGNQTDADSNTAGEEVASRLLNRQQSIHPPPAFGSSTNLEALALEA SRSQGQDHDITSDNGRSIYRPMHEITFSTIDKPKLLSELTSLLGELGLNIQEAHAFSTND GYSLDVFVVVGWHDEETEDLVEAVQKEIGRIDETQAWSSSHSWSTPVENMQIVENSSADR VEIPTDGASEWEIDVKLLKFGNKVASGSYGDLYRGTYCSQDVAIKVLKPERINADMQREF AQEVYIMRKVRHKNVVQFIGACTKPPNLCIVTE…
CdMAPKKK24	CdRAF11	MEEQNSWLRRTKFSHTVYSRVDPYRVPIAPLSKDIERKLQKFATMGKSMSMPVDRDNEGT GTALKHSPSLPLVRSSLQLDRDKANKPKTASLEIPLSPPLNSGNSKGLRAGSLVKSPSST MFLSPSRNPENSKGPRARSLVKSPSSMLLLSYLNKAPSIQGSSPQKAERLQHRPRSKSPL PSTAPSEVFREAKSSSKRFASPPPQRRGSEKSIYGKSFVMQVSDFGQSPDWCSTPVLSGK HKSTKKHNGRRRVSAVDTTDDQRGQRVRMNQAVQTTVDWTLDPSKLLVGQRFTSGAYSRL YRGFYDEKPVAIKFIRQPDDDDNGKLAAKLENQYNSEINSLSHLYHKNVIKLVAAYKCPP VFYIITEFLSGGSLRSYLNSTENHPIPLEKIVS…
CdMAPKKK25	CdRAF12	MGGALRSEDGDLYMRWKAVSKQLRKRQKCVVVPIGGMSIGFCRHRAILFK ELADCIGLPCRIAQGCKYCSAPHRSSCLVKIDSERRYVREYVVDLVVDPG SITSPDSSINGQLLSSVPSPFKTLCTTGSTNNAAQLACSQAILDDRCNNT VLSTSQYSAARLCVVEEKNSVHAAGREGLHPKYCQITQNGHCNGVSALEL SAAQLKVMDIGNENGNKENLLGASLQKRLSIETSLAPDWLEISWEELELK ERVGAGSFGTVYRADWHGSDVAVKVLTDQDVGEAQLREFLREISIMKRVR HPNVVLFMGAVTKCPHLSIVTEYLPRGSLFRLISKASTGEMLDLKRRLRM ALDVAKGINYLHCLNPPIVHWDLKTPNMLVDKNWSVKVGDFG…
CdMAPKKK26	CdRAF13	MAEGPRFHGMIGGGGGKGMQDNEINGFYNMPYYHKIGEGSHMSVDSADGFNLANCAGGSV AMSVDNSSVGSNESRTVILKHPGLRDAPTASYSVGNSVFRPNRVAAHTLNEDALARVLMD PNHPTEILSNYEQWTIDLGRLDMGDPFAQGAFGKLYRGAYNGEDVAIKLLEKPENDPERA QLMEQQFVQEVMMLSRLSHPNIVRFIGACRKSIVWCIITEYAKGGSVRQFLARRQHKSVP LRLAVKQALDVARGMAYVHALGFIHRDLKSDNLLIAADKSIKIADFGVARIEVKTEGMTP ETGTYRWMAPEMIQHRPYDHKVDVYSFGIVLWELITGMLPFTNMTAVQAAFAVVNKGARP VIPHDCLPALSHIMTRCWDANPEVRPPFTEIVC…
CdMAPKKK27	CdRAF14	MSAAEEHAAGGGGGSGGGSSGGAGSSGSGGGARRRFDDKGLVARTSLILWHTHQNDVGAV RKLLEEDAALVNARDYDSRTPLHVAALHGWQDVAECLIANGADVNAQDRWQNTPLADAEG AKRQAMIELLKEHGGLTYGKTGSHFEPKTVPPPLTNKADWEINPLELDFTKAVIIGKGSF GEILKANWRGTPIAVKRILPSLSDDRLVIQDFKHEVNLLIKLRHPNIVQFLGAVTETKPL MLITEFLRGGDLHQYLKEKGALSPLTAVNFALDIARGMAYLHNEPNVVIHRDLKPRNILL VNSAANHLKVGDFGLSKIIKAQHANDVYKMTGETGSYRYMAPEVFKHRKYDKKVDIFSFA MILYEMLEGDPPFSNYEPYEAAKYVADGHRPTF…
CdMAPKKK28	CdRAF15	MVEGPNFAGMIGGIGGHDNGGNFCDMAYYRKLGEGSNMSVDSMNSMQTST HGGSIAMSVDNSSVGSCDSHTRMLNHPGLKGPVRADYSVGGHTIFRHGRV SHALSDDALAQALMDPRYPTETLKNYEEWTIDLAKLHMGMPFAQGAFGKL YRGTYNGEDVAIKLLERPEADPERAGLMEQQFVQEVMMLATLRHPNIVKF IGACRKPMVWCIVTEYAKGGSVRQFLTKRQNRSVPLKLAVKQALDVARGM AYVHGLGFIHRDLKSDNLLISGDKSIKIADFGVARIEVKTEGMTPETGTY RWMAPEMIQHRPYDQKVDVYSFGIVLWELITGMLPFANMTAVQAAFAVVN KGVRPAIPQDCLPTLGEIMTRCWDPNPDVRPPFTDVVRMLEH…
CdMAPKKK29	CdRAF16	MVHPPPAFGSSSNLEALALETSEEGDVGSTNNDADNSVHLISRPMHEITFATIDKPKLLS QLTCLLGELGLDIQEAHAFSTIDGYSLDVFVVTGWHLGGTEKLQVMLLQKLQKIEAQTWP VSCSSSASMEGLQGGESVPSTSVEIPTDGVDVWEIDLKLLKFGNKVASGSNGDLYRGSYC SQDVAIKVVRPERISADMYRDFAQEVYIMRKVRHRNVVQFIGACTRQPNLYIVTDFMSGG SVYDYLHKRNSSFKLSEILRVATDISKGMNYLHQNNIIHRDLKTANLLMDENKVVKVADF GVARVKDQSGVMTAETGTYRWMAPEVIEHKPYDHKADVFSFGVVLWELLTGKIPYEYLTP LQAAIGVVQKGVRPTIPKDTHPKFAELLQKCWH…
CdMAPKKK30	CdRAF17	MEAGRHRLGLGLGSERTRLGVYHDVLRRLRDAGATEALAPDFADKLWTHFHRFNFRYAMD VNVERAEDVLTHMHLLDKATRPENQPAFSVRVVQVPLPPTEDDSGEPTTDSSQPNPTEPD SPATPRRLTPHPEPIFGSSQSLKTLVRQASSKNLLNDGDAVDALLRPMHEITFASNDRPK GLTQLSSVLGKLNLDIKEVHALSTNDGYFLDIFIVVGWDHKETQQLEEALDKEIHTYKMQ LEEALDKEIHTYKMQMPATSSCWPPELAGKQCQTNTNSKDKHIDVPKDNTDEWEINFKAL KFQDKVASGTYGDLYRGTYFGEDVAIKVLKSDRLNENMEKEFAHEVYIMRKIRHKNIVRF LGACTKPKTLCIVTEFMKNGSVYDFLHKRKGSF…
CdMAPKKK31	CdRAF18	MVAAEAAAGGDVEEGVGESSSPPRDAAPAPAVSGGSGGAARDICGQVYERLVADGHEGAS DPEFRERLVAHFARLPHSYQLDINVDKAADVIVHQKVLAEAKDPDRRPAFRVRFLRIEDV DPSFDSDASEEGDDDGDDLSVRQDTSSVHIHEIVFSTIDKPKLLSQLSALLSDIGLNIRE AHVFSTFDGYSLDVFVVDGWPIEDTDGLDKALEASILRNEGSWSGSSHSSAAERTLPFQL KGGEWEIDKRLLKMGERIASGSCGDLFHGTYLGENVAVKVLRAEHLNKNVLNEFTQEVYI LREVQHANVVRFIGACTKPPQFCIITEYMSGGSLYDFVHKQHNVLELTTLLKFAVDVCRG MFYLHERGIIHRDLKTANLLMDKDHVVKVADFG…
CdMAPKKK32	CdRAF19	MESGSSLYGGEGLSIDPKWLIDPKLLFVGPRIGEGGHAKVYEGKYKNQNVAIKIVHKGDT PEEITKREGRFLREVTMLSRVQHKNLVKFIGACLEPVMVVVTELLVGGSLRKYLVSLRPR SLEPRIAVGFALDIARAMECLHAHGIIHRDLKPENLLLTADQRTVKLVDLGLAREETLTE MMTAETGTYRWMAPELYSTVTLRHGEKKHYNHKVDVYSFAIVLWELLHNKLPFEGMSNLQ AAYAAAFKNIRPSADNLPEELSEILTSCWKEDPNDRPNFTQIVQMLLHYLSTLSPQQNVA PRRTFSSENTILPPESPGTSSLMASRGDLGDTPKGKMEDKPRGFFFCFSECY
CdMAPKKK33	CdRAF20	MLSCFRLARPAAAGDADPAALASPRRLALPVPVASLSTSGRGKHPWPSEADDMEKKRWDS MESWSMLLDTALAAPAGEGESSGRREEWMADLSQLFIGNKFASGANSRIYRGIYKQRAVA VKMVRIPERDEERRAVLEEQFNSEVAFLSRLYHPNIVQFIAACKKPPVYCIITEYMSQGT LRMYLNKKDPYSLSPETILKLALDISRGMEYLHAQGVIHRDLKSQNLLLNDEMRVKVADF GTSCLETRCQASKGNKGTYRWMAPEMTKEKPYTRKVDVYSFGIVLWELTTCLLPFQGMTP VQAAYAACEKNLRPPLSSSCPPVLNNLIKKCWSANPARRPEFSYIVSVLEKYDHCVKEGM PVMVHQELRLWRSFTKIFRMGCITSNLPISVHV
CdMAPKKK34	CdRAF21	MPRLSCSCKFADPDSVVSSAATARRVRPDTMSCGSDGCRDGSGGGSEEFRRPRPSKVAAD DLVAPELCSDSAAPARSSDATAPASWIDRKLLVDPKTLFVADKIGEGAHGKVYKGKYGDQ IVAIKVLNCGSTPEEKATLEARFIREVNMMCKVKHENLVKFIGACKEPMMVIVSELLPGM SLKNYLNSIRPNLLDTHTAISYALDIAHAMECLHANGIIHRDLKPDNLLLTANRKKLKLT DFGLAREETVTEMMTAETGTYRWMAPELYSTVTLRRGEKKHYTNKVDVYSFGIVLWELLT NKMPFEGMSNLQAAYAAAFQQKRPPFPEDTPQELVFIVQSCWVEDPGMRPSFSQIIRMLE TFLMTIPPPPTPESNEDEEVEETKSSLSSRSSS…
CdMAPKKK35	CdRAF22	MAELSKPTPKPKRRAKSPIPTRVVSDVFKEAKAATKRFSSPQKQRRSNSQ RSPDDSPPVGFASLRTPSKLRITRRATSWPRNPDNGVTKVAALEILERWT VDRSQLLIGHRFASGAYSRLFHGIYKEEPVAVKFIRQPDDGEDDELSARL EKHFTSEVTILARLQHRNVIKLVGACNCPPVFCVITEFLSGGSLRAFLRK LECKTLPLEKVISIALDIARGLEYIHLQGIVHRDVKPENILFDGEFCAKV VDFGVACEEAHCNVTDDDPGTYRWMAPEMYKHKPYGRKVDVYSFGLLLWE LVTGSLPYEDMTPVQAAFAVVNKNLRPVIPSSCPAPLRLLIEQCWSCQPE KRPGFQQIVRILDNFKTVLDRDGTLDKVPSFTRQAQECNDQS…
CdMAPKKK36	CdRAF23	MSESMRQNRLSREHNGDSPGGSSDSQKYESVGDSYDKEVSARGPNALEGL RRQINAQKAVSLPSSPHRSGIHGSDLGGPVDFTAEDLMSTWNKVLQSSPF LNKPLLPYEEWHIEFSEITVGTRVGIGFFGEVFRGTWNGTDVAIKVFLEQ DLTTENMEDFCNEISILSRLRHPNVILFLGACMKPPHLSLVTEYMEMSSL YNLIHSRAQRSKLHWRRRLKMLRDICRGLMCIHRLKIVHRDLKSANCLVN KHYTVKICDFGLSRVMTDSATNDNSSAGTPEWMAPELIRNEPFTEKCDIF SFGVIMWEICTLSRPWEGIPPVQVVYSVANERARLEIPDGPLGSLIADCW AEPEKRPGCQEILTRLLDCEHTLC
CdMAPKKK37	CdRAF24	MEKKKEDAAAGRQQSRQRREDWEIDPAKLVVKGVIARGTFGTVHRGIYDGQDVAVKLLDW GEDGHRSEQDIAAVRAAFSQEVTVWHKLDHPNVTKFIGAIMGARDLNIQTENGHIGMPTN ICCVVVEYLAGGALKSFLIKNRRKKLAFKVVVQIALDLARGLSYLHSKKIVHRDVKTENM LLDKTRTVKIADFGVARLEAANPSDMTGETGTLGYMAPEVLNGNPYNRKCDVYSFGICVW EIYCCDMPYPDLSFSEVTSAVVRQNLRPEIPRCCPSSLANVMKRCWDANPDKRPEMAEVV SMLEAIDTSKGGGMIPVDQRPGCLSCFRKYRGP
CdMAPKKK38	CdRAF25	MPFAQGAFGKLYRGTYNGMDVAIKLLERPEADPEKAQLLEQQFVQEVMML ATLRHPNIVKFVGACRKPVVWCIVTEYAKGGSLKNFLSKRQNRSVPLKLA VKQALDVARGMAYVHGLGFIHRDLKSDNLLISGDKSIKIADFGVARIEVK TEGMTPETGTYRWMAPEMIQHRPYNQKVDVYSFGIVLWELVTGSVPFANM TAVQAAFAVVNKGVRPTIPHDCLPALGEIMTRCWDANPDVRPPFAEIVRM LEQVELEVMNSVRKARFRCCISQPMTLD
CdMAPKKK39	CdRAF26	MSPPPPPPSSSRQDWDEGMSQSSPSQPYLQEVLGRIDERLRRRTAGHQQG PSFQRRLSRHLQRLPEKYLADHDAEEKADDVLLHWGILDECADPDKRPVF HARYLKSITGPADSHATCEQDPDEPCEKLMEDLSLERRRRKAADGNDSVS ISSRGDLKTTLLHEIIFSSLDRPGLLSRLTGLLSEVGLNIREAHIYSTTD NFCLDVFVVDGWKTEETDELMERIKEELEKKNAAASDSTTSSTSEKILDL QQKVGDYEIDMTKLTKGEKIASGSSADLYRGTYDGLDVAIKFLKIENLSN TSKYEFLQEVLILSSVDHENILQFYGACTRHPKYCIITEYMPGGNLYDFL HKQNNYLELLTILKIAISISKGMDYLHQKNIIHRDLKTANLL…
CdMAPKKK40	CdRAF27	MVSQPEEDAALAAELERQFASEVALLLRLRHPNIISFVAACKKPPVFCII MEFMAGGSLRKYLHQQEPHSVPIEIVLKLSLDIARGMSYLHSQGILHRDL KSENILLGADMSVKVADFGISCLESQCGSGKGFTGTYRWMAPEMIKEKHH TRKVDVYSFGIVMWEILTSLVPFSEMTQEQAAVAVALKNARPPLPASCPV AISHLITQCWATNPDRRPQFDDIVAILESYKEALDEDPSFFMSYIPPPMH HHHHHHHHHHQRLLRCFPRCITMRRSASLNV
CdMAPKKK41	CdRAF28	MSSQQQMDFVWTSLLLMAGVLRRLTICYKSSRRKREGIMCLCLIQQIPKPHREFLSCKRK LETDDLLQKLKEKAGRDHVSLSNPTNSEASQRVLELQEKIGDSDIDRGQLQIKEKIASGS SGDLFRGTYRGMDVAIKFLRTEHINDSSKVEFLQEIMILRNVSHKNVVRFYGACTKQRKY LIVTEYMSGGNLYDFLHKKNNALELPMILRMGIDISRGMDYLHQKNIIHRDLKTANVLIG SDLGIKIADFGVSRNPAQGGDMTAETGTYRWMAPEVINHKPYDHKADIFSFAVVLWELAT SKIPYEDLTPLQAALGVRQGMRLEIPSSVHPRLSKLIQQCWDASPHLRPTFSEITVELED ILRHVQGSKGVNRHSKAKIHKKSPQ
CdMAPKKK42	CdRAF29	MEQDFHPECFREFMREVAIMKSLRHPNIVLFMGAVTEPPNLSIVTEYLSR GSLYKLLHRSGAKEVLDERRRLNMAFDVAKGMNYLHRRSPPIVHRDLKSP NLLVDKKYTVKVCDFGLSRLKANTFLSSKSLAGTPEWMAPEVLRDEPSNE KSDVYSFGVILWELMTLQQPWCNLNPAQVVAAVGFKGRRLDIPKDLNPLV SALIESCWANEPWRRPSFANIMETLRPLIKVPVPQLIRSDS
CdMAPKKK43	CdRAF30	MNRQVPEDSPTPDFVQIPADSTDVWEVDPRLLKFEQKLASGSFGDLYHGT YCSQDVAIKVLKPERVSVDMLREFAQEIYIMKKVRHKNVVQFIGACTRPP LLCIVTEFMHGGSVFDFLYNRRGKFQLPDVLRIASDVSKGMNYLHQINII HRDLKTANLLMDDQVVKVADFGVARVKDQSGVMTAETGTYRWMAPEVIEH LPYDHRADVFSFGIVLWELLTGKLPYEDMTPLQAAVAVVQK
CdMAPKKK44	CdRAF31	MGARDLNVQTETGHLGMPSNICCVVVEYLPGGALKNFLIKNRRRKLAFKV VVQIALDLSRGLSYLHSKKIVHRDVKTENMLLDKTRTVKIADFGVARVEA SNPSDMTGETGTLGYMAPEVLNGHAYNRKCDVYSFGICLWEIYCCDMPYP DLSFSEVTSAVVRQNLRPEIPRCCPSSLANVMKRCWDANPDKRPEMAEVV TMLEAIDTSKGGGMIPKDQTEGCFSCFRQHRGP
CdMAPKKK45	CdRAF32	MLIIQITEFWREAAILSKLHHPNILAFYGVVNNGPEDTLATVTEFMVNGSLKKVLLRRDK YLDWRKRVMLAMDAAIGMEYLHSKDIVHFDLKCDNLLVNVKDPSRPICKVADFGLSKMKQ ATMVSGGMRGTLPWMAPELLTMSGTKVTQKIDVYSFGIVMWEILTGKDPYDGMHYGGVIG GILSNTLRPPVSGSCNPEWRRLMEQCWSTEPEKRPSFTEVASRLRAILEASQIESPR
CdMAPKKK46	CdRAF33	MFLGTYGGEEVAVKMLSPDNLNESSWNEFKQEIFMLREVDHPNIVRFVGSCTKPPEFYIL TECMSRGSLFDFLHNERNILDLPTVLKFSLDVCRGMLYLHQKGIIHRDLKSANLLLDKDH VVKVADFGLARFQDQGGAMTAETGTYRWMAPEVINHEPYDNKADVYSFSLVLWELITSKL PFISMTPVQAAVGVRKGLRPQLPENANPRLLNLMQRCWEPIPSDRPSFSDIIAELEDIQA QAQGQSGESSEKEKGGD
CdMAPKKK47	CdRAF34	MAYIHSQGVVHRDVKPENIIFNEEGCAKIVDFGIACEEAYCDPLANDTGTFRWMAPEMMK HKAYGRKVDVYSFGLILWEMFSGSVPYEDLNPFQAAFAVFDKNVRPVIPMSCPAPVRLLI AQCWASNPDKRPEFSQIVQILEKFRMVLDRDGTLDNMPTSNCEEVHDHKNWLAHWVQKLK HSQPDLSGPPPPKLL
CdMAPKKK48	CdRAF35	MEQDFHPERLKEFLREVAIMKSLRHPNIVLLMGAVTQPPNLSIVTEYLSRGSLYRLLHRH GTRESLDERRRLSMAFDVAKGMNYLHKRNPPIVHRDLKSPNLLVDKKYTVKVCDFGLSRL KANTFLSSKTAAGTPEWMAPEVLRVEPSNEKSDVYSFGVILWELMTLQQ
CdMAPKKK49	CdRAF36	MALDVARGMNYLHNCTPLIVHRDLKSPNLLVDKNWVVKVCDFGLSRMKHS TFLSSRSTAGTAEWMAPEVLRNEPSDEKCDVFSYGVILWELCTLLQPWEG MNPMQVVGAVGFQQRRLSIPGNVDPAVAKIIERCWQTDPKLRPSFAEIMA SLRSLLKNMPASQPTRKRAQQADEQNWR
CdMAPKKK50	CdRAF37	MTGATGTLGYMAPEVLEGKPYNRKCDVYSFGICLWEIYCCDMPYPDLSFA DVSSAVVHQNLRPEIPRCCPSPLANIMRKCWDANPDKRPDMDEVVRLLEA LDTSKGGGMIPEGQASGCLCFFRARGP
CdMAPKKK51	CdRAF38	MENGSLDRWLHRRDESIEPLGWQRRLGIANDAARGLSYMHHECARPIMHR DVKSSNILLDPAFRAKVADFGLARILVKSGEPESVSAVGGTFGYMAPECG RGVRLNEKVDVYSFGVVLLELATGRVA
CdMAPKKK52	CdZIK1	MMGATTTAADCPEYAEVDPTGRYGRFKDVLGKGASKTVYRAFDEFQGMEVAWNQVKLHDF LQSPEDLERLYCEIHLLKTLKHRNIMKFYTSWVDVSRRNINFITEMFTSGTLRQYRQRHR RVNIWAVKHWCRQILSGLLYLHSHDPPIIHRDLKCDNIFVNGNQGEVKIGDLGLAAILRK SHAVHCVGTPEFMAPEVYEEEYNELVDIYSFGMCVLEMVTFEYPYSECAHPVQIYKKVIS GTKPESLYKVKDPMVRQFVEKCLATASERLSARELLEDPFLQVDEMPFASEDGDYNVTNY LRQPSYLGHAYSDSSMMTNGLSESIDEDMPTEDRWDCEDDDMKAHDGIHLFNGHEDEPLG NVDITIKGRKSEDGGIFLRLRIADGDGRVRNIY…
CdMAPKKK53	CdZIK2	MLNDYVHQCSKMKVKCEKLIFEKEDGVGGLLDLIASHGVTNLVMQAAADKHYSRKMVRPK SRTAIEIMQRADPFCKIWFVCKGRLICTREEGVEISRDVSPGSSSVHSCASLVVVERGRS VDEEAVSWRRQRQVFALRENETPVIPIKPLPETANSLRPSPPPAKMPPTPPEPDTDPEFV ELDPTGRYGRYTEILGKGAFKTVYKAFDQHEGLEVAWNQIKVGDLLRNNDDLERLRSEVR LLKTLKHKNIIKFYNSWLDKKNNNINFITEVFTSGTLRQYRIKHKKVDVRALKKWSRQIL SGLHYLHSHDPLVIHRDLKCDNIFVNGNQGEVKIGDLGLATILDHARSAHSIIGTPEFMA PELYDEEYNELVDIYAFGMCVLELVTFEYPYCE…
CdMAPKKK54	CdZIK3	MEVFGGVKEVVDAEYAEVDPTGRYMRYNVILGRGAFKTVYKAFDEVEGIEVAWNQMNIDE VMQCPDNLDRLYTEVHLLKSLKHGNVMKFYYSWIDDHNKTINVITELFTSGSLRNYRLKH PHVNLKAIKNWARQILHGLDYLHSHQPPIIHRDLKCDNIFVNGNHGEVKIGDLGLATMMQ TPRAKSVIGTPEFMAPELYDESYDELVDIYSFGMCLLEIFTLEYPYSECKNPAQIFKKVS TGVKPAALGKIADPQVKQFIEKCLAPASERLSAKELLQDPFLCSDNTDGPAGTKFPSPTP DKAVDISVDSLHMDVDTCESSPGSSSKANGCVTPHKPVLEFTGTNRNTELKLKGEKLDSN SVSLVLRIADISGHARNIHFVFYLDSDTAMSVA…
CdMAPKKK55	CdZIK4	MAVEQQRGEQAGGEEAFEEVDPTGRFGRYADVLGLGSVKKVYRGFDQEEG IEVAWNRVRVRALADRDPGMVDRLHAEVRLLRSLHHRHIIGFHKVWLDRD AGVLNFITEVCTSGSLREYRQRHRHVSVKALKKWARQILEGLNHLHTHDP CIIHRDLNCSNVFINGNNGQVKIGDLGLAAIVDKTHVAHTILGTPEFMAP ELYTETYTESVDIYSYGMCVLEMVTREVPYAECGSVVQIFHNVTRGVPPA ALKRLKDPELRGFIERCIGQPRNRPSAAELLQDPFFAGIGEEDDDALTDV ASVVAAAGPPVPRPRSYVDDLAGLRLD
