# Supplementary material for: Transcriptome-wide identification of MAPKKK genes in bermudagrass (Cynodon dactylon L.) and their potential roles in low temperature stress responses
Source: PeerJ. 2020 Oct 28;8:e10159. doi: 10.7717/peerj.10159 (PMC7602684; doi:10.7717/peerj.10159)
Supplement: Supplemental Information 7 [file peerj-08-10159-s007.xlsx]

## Sheet: Table S2
Table S2 Promoter sequences of MAPKKKs in bermudagrass.
MAPKKKs	Subfamily Gene IDs	Sequence Information
CdMAPKKK5	CdMEKK5	CCGGCCTCTTGTCGTAGACATTGGTCTTGAACTGCTCGAACCCCCCCGCGTGTACGCAAC TCTCTCTCCTCTCTCTCTCTCTCTCTCATCTCTCTCTGGGACTGGGCGCCCGCCCGCCCG CCGTGGAGGGGAAGGAAGGATGCCGTCGTGGTGGAAGGGAAAGCTGAGGAGCAAGAGCAA GGGCCCCGCGGCGGCGGGACTGGTTCCGCCTGCGGCCAGCGGAGGCGGGGAGGAGGACGT GAAGGGGCGCGGCGGGAGGAAGAAGGCGAGCAGCTTCGACGAGGCGGTGCTGGCCAGACC CGGCCGTGGGAAGCAGTTCCTGCAGCACGCGCAGGCGGCGGAAGCGGTCGGGCACCCGCT GCCGCGGCCGGCGTCCGTGCCGTCCGCGTCGGC…
CdMAPKKK16	CdRAF3	TGTGGAAGAGAATATCCGCGGCGGGAGCAGAGGCAGCTCCCCGTCCCGGACGAGGCCGCG TGTCCCCTCCCTGGCAGAGTGGCAAGGCGAAGGCATCCCCTCCCGACCCCACCCGACCCG GCGCGGACCGGGAGCCGCACACACACCCGCCTCCACGCGCAACGGCGCCGACGAGCCCTT CCTTTCCTCCCTCGCAATGGCGGCGGCGCTCCTCGCCTCGGCGTCCGCGTGACATGATCC CTAGTTCCCTCCCTTGTGGAAGAGAATATCCGCGCGCCCGAATCGCACCCCCGGCCCGGG CCAGCCTACCCCGATCCTCGCCTCCCAACCGCAAATCTCTCCAACTCCACCACCCTCCTC CCCCGTCTCCATCTCCCAGCGCCGGGAGCACCC…
CdMAPKKK19	CdRAF6	AGCCGCAGCAGGACGGAGGGAGAGGAGCAGCGGGGGCGGAGGAACCGTGGTGCCAATTGC CATCTTTACACCCACCCCCCAAAGCCACCACGGTTCCTCCGCCCCCGCTGCTCCTCTCCC TCCGTCCTGCTGCGGCTTGCACTGGTGCGTACCGACGCCCGCCCCACAGCTGGAGCCGTA CTTTACTGGCAGCAGTAATCTTCGTCCCACCCGCCTGGCCTCGGCGCCTCCTCCCTCCCC CGCCCTCGCTGTCCTCGCTTCCCAGCGCGGCTGTACCCGCCGACGAAGCTGCAACCGTCT CCGCCGCTCGAGCCTCCGGGGAGTCCGGAGGAGGCTTGCCCCCGCCCGCGACGCCGCGCC GAGCACGAACGCCGCTGGTCGGATCCCCCACCC…
CdMAPKKK20	CdRAF7	GCACGGAGAGATGGACAAAGAGAAGACACCGGAAACCTTCGTGATCGTTTTGCTGGTTTC AAGCCTTCCGTCGCCGCGTCGTCCTCGACCTCCGCCACCGCCCAAAAAAAGCAAGAGGAA AAGGAAACAAAAAAAAAATAGAAAAACAAATAAGCGGGGATCGCGGCGCGTCGAGGCGAG GAGAGAGAGAGAGAGAGAGGGCGAGGTGCGGCCAAGCGCGGCGTAGCGCGCCGGCAATAG AAGCTGCACCCCCGTCGTCGTGGTCGTCGTCTCCCGCACCGGCGTAGAGGCGGGGCTCGC TCGCGGCTCCGCGTGTCGGTGGCCGGCGCCGTGGTGGCGGGGCAGTCACCCCGCGGGTGC GCGCTCGTGCTCGCGCCGGCGTAGCTGGCCCGG…
CdMAPKKK24	CdRAF11	GGGAACAGCAAACGTTTGGGAGGGCCGTCTGCATTGAGCCATTGACCCCTCTCAGTTTAT ACCTTTATACACCCGCAAAATCGTTCCTATTTCCATCCATACCCCCAGCTCCTTTCTTTC CACATTATCACAGGAACCCAGGATCCATCCATATTTAACGAACGGTCCCCAAGAAGCAGC ACAGTTCCGTTCAATCTGCTATTCGGTGTGCATTGACATTTCAGTCCCTGTACCTGTACA TATTCCAAAGGAGGCCCTTTTCGGGGAGAGAAGAAGAAACGCATCCGCACCCCTGCAGCT GGGCTTGGGAACAGCAAACGTTTGGGAGAGCCAGCCCGTAGTACGGCGGCGGGGGGAGAG GCGTACGTATCCCACCGGCACGCGGCCGCGTTC…
CdMAPKKK29	CdRAF16	CAACATTTGATGGATTTCTAAAAAATACAGATCACTGCAGTATGAAAGCTGAACGCGAAA TCAAAATTACTCTTCCTAATTTGATTTTTTTTCTTTAACCGTTGGGCTGGACAGCAGCAA AAGTTTCTTGTCCTCCAGGCAAGTAGTATTTCTTTCTTCTCCAGATTCGACAAGGTGTTC GTCTCCGACTCACTACTGTCTCCGCCCCTTATCGCTGTTATAAAGGCCTCGCCTTTGGTC GCCGTCTCTTCACGTGCACGCCACCACCTTCCATGCAAGGGTAGCAACACCACGGCCGTC TCGTGTCTCCGTCCCCGCATCGACATCACCGCGCGCGGCTTCCCCATAAGATCCATGGCC GTGGAGGATCCGCCGGCGCCGGAGCGGCAGAGG…
CdMAPKKK32	CdRAF19	GCTCGATTTCCCTGCGGGGGGTCACGTGACGGCGAGCCTTCTACGGGCCTTCGTACGGGC TGTTTCGGAATTGGAATCATCGATTCCATCCGAATTCCAGCCTTCCCCGATTCCTGCCCG CACGCCGCGTCATTCCTCGGGAAATCGAGCTTCTGCTCTTCGCCACCGACGAGCTCCTCC TCGCCGCCCGCCGCCCGCGCGCATCTCTCCTCGGCGACCAACCCCTCCGTACACAGCCGC TCGCGTCGGCTTGCTCGCCGCCGACGAGGCCTTCCTCATCTCCGACGAGGTTTGGGCAGA TGATCTGCGAGCAAGAGGGAGCATCAGCAGAAGCTTGTAGACACTGAACCGGGCGCTACT CCGCTCGTCGCGCGTCGCCCGTGACCTCACCGC…
CdMAPKKK34	CdRAF21	CTTCTCAACATGAACCTCCAGAACCTTCTTCTCCTGAACAACCTTCTCCCCCCCAACTTT TTCCTTCCCCCTCACGACGATTGACGACGACCAGTCCCCCAACCCCACGCCAAATCGCAT CCGCGTCCGCTAGGGTTAGGGTTCCGGCTTCAGTCGTGATTTTTGGTGGATTTTTTTCGA TCTCCTCGTCTTAGATTTCAAAATTGCCGCGCACAGCTCAGTGTTTGGAAACAGTCGTCG TTCCATTTTTATTTGATTTCCTTCGTTGTTTCGAGCCACTTTTCTTTTTGGTAAATTTTG ATGGGAAAGCCGCAGCCCTGAATTACTGGAGCCGCTAATTTCTGCTCTTTTTTTCTTCAA AAGCTGTTGCGATTTCTCTCCAAAATTTTGCTG…
CdMAPKKK45	CdRAF32	TGAAGTGCACCGTGCACACTTTGTTTTCGCACGTGCGTCCAATGCAGAAAAGGAAGCAAA GTTCATTGCTCTCGTCAACGGACTACAGAGTCTTGGCAGTACCCCAACCAATGCAGAACC ACCTAAAACATTGAGCGGACAGCCGGAGAAGACACTTCCACCTCCAACTTTCCTGACGAG GATGGCCAGAAAAGAACACAAGGCACAGAATAGCAAAAGCAATAACCTGATAACCTCTGA CAAAATGATGACTACTGCTCACCATGGTTCATCTGTGACATCTGAATCCAGGTATGCAGC TAAGGAGGCATGTAATGCAAATGCTCACTCAAGGCATCAGCAGGGACTTCAGAGAACTAC TACAATCATGATTACAAAGGACGATCAAACCAG…
CdMAPKKK46	CdRAF33	AGTATATCTCATTTTCACTTCCAGTCCTCCGTTCCTCGCGCCCGCAGAATACTCCCTTCC TGCCCCGCCTCGCCCCCGTAACAAACCCGCGACCCCACCTCACCGCCGGCCTTCTCGTAC GCGCGGGCCGGAGAGGAACCCTAACCTGGAGAAGGAGGACGGCGCGCGCGCCCCGGCGAT GGCGGCGGCTGCTGCTCCGGCCGGGGGCGGCGGCGGCGCCCAGGAGGGTGTCGGCGAGAG CTCGTCACCGCCTTGCGGCCCCGCGCCCGCGCCTTCAGCCTCGGGCGGGGGCGGCCGCGG CGGAAGGGCGGGAGGCGGCGGCCTCCGCGACGTTTGCCGCGAGGTGTACGAGCGCCTCGT CGCCGACGGCCACGCGGAGACGCTCGCCCCCGA…
CdMAPKKK47	CdRAF34	CTTTGATCCACCACCTGTCGTCTCGCCACCTCAAAAAACCTGCGTCCTTGGGCCGCGAGA TTATTTTCTTGAGAAGCAGAGGAGATGGACGACGAGGACTACTCGTGGGTGCGGCGGACG CGGTTCTCGCACTCCGTCGTCCGCTCCAACTCCGGCAGGGAGCAGTTCGGCGCCTTCGTC GAGCAGTTCAACCGCGGCGCCGCGCTTAGGCAGAAGGGCGCCGCCTCGGGGTTCAAGCTC CATGGTCTCAACATGGAGCCCGGGACGAGGCACTCCGCCTCCTCCGATAACGGGGCGAGA CACTCGGCCTCCTCGGATCCCGGGACGAGTCCGCTGAGCGCCCAGCCGAAGCTCAAGGGC ACGTCACTGGACGACGCCAAGCCGATGCAATTG…
CdMAPKKK53	CdZIK2	CGAATTTCGGTCATGTGGCAAGTGTTCACATACTCTCCAGACTCCAGGTGCTGCCGTACA TAGTTCGGAGCTGCAGGTGCCAGGGAGGCAAGGAGAGGAAGCTGTCTTCCTCCTCCTCGA TTGAGTTCTTCTACGCCTAGGCGGCAAGGAGAGCTCTGCCAAGAACATGGCGACGGAGGA GGAGAAGAAGGTGTTCGTGGCGTTGCCGGCGGAGTTCAAGGCGGGGCAGTCGACGCTGTC GTGGGCGCTCAGCCATTTCGCCGGCAGCGGATCCACGATCGTGATCGCACATGTCCATGT CCCGTCCAAGATGATTCCAGTCAGTAGGTCCTCTTTTCTTCCTTTACATCTCATCATCGT CTCGCTATATGGTTCTTCCTTCTTTTGCTGAAA…
