# Supplementary material for: Transcriptome-wide identification of MAPKKK genes in bermudagrass (Cynodon dactylon L.) and their potential roles in low temperature stress responses
Source: PeerJ. 2020 Oct 28;8:e10159. doi: 10.7717/peerj.10159 (PMC7602684; doi:10.7717/peerj.10159)
Supplement: Supplemental Information 8 [file peerj-08-10159-s008.xlsx]

## Sheet: Table S3
Table S3 The primers used for qRT-PCR in this study.
Genes	Forward (5'-3')	Reverse (5'-3')
CdMEKK3	TTGAAATGGCAACGGCAAGA	GCATGCAATCTGCTGGAGAA
CdMEKK4	GGAGGAGGAGGACGAAGATG	CCGTTGGGAGAGACGTAGAA
CdMEKK7	ATGCTTCAGCGCCTCAATTC	TACCACTAACGACGCTGTCA
CdMEKK8	TCAACACAAGACGCATGGAC	CTTATCTCGCTCTCCAGGCA
CdMEKK11	ACCAGCTCTTCCTCGAGTTC	CACGTTCCTGGCCTTGAC
CdMEKK12	GCTCGTACAGCCTCTTCCTC	CGCCGATCACCACGTTGC
CdMEKK13	TGCTGAAATGCCTGCAGAAG	ACGGAAGTTTCCTTGTGTGC
CdRAF2	AAGCTTGCATCTTTGCACCA	ACCCAAATCACCAACCTTGC
CdRAF14	ATAGGTGCCTCAAGGTCCAC	GCTAGCAGTCCTCAACAAGC
CdRAF16	GGAACTTACCGTTGGATGGC	GGTGTCCTTTGGGATTGTCG
CdRAF38	CCGGGATGTCAAGTCCAGTA	CCACCTTCTCGTTCAGCCTA
CdZIK4	TGCATCATCGGGATCATCGT	AGCACGCAAAGTCAAACACT
CdACT2	TCTGAAGGGTAAGTAGAGTAG	ACTCAGCACATTCCAGCAGAT
