# Supplementary material for: Transcriptome-wide identification of MAPKKK genes in bermudagrass (Cynodon dactylon L.) and their potential roles in low temperature stress responses
Source: PeerJ. 2020 Oct 28;8:e10159. doi: 10.7717/peerj.10159 (PMC7602684; doi:10.7717/peerj.10159)
Supplement: Supplemental Information 9 [file peerj-08-10159-s009.xlsx]

## Sheet: Table S4
Table S4 Detailed information of putative co-functional genes of CdMAPKKKs.
Rank	Arabidopsis thaliana TAIR10	Paralogs	Symbol	Score	Evidences(with fractions of contribution)	Linked_q/valid_q	Linked_query	GO description
								BP (Biological Process)	CC (Cellular Component)	MF(Molecular Function)
1	AT4G28860	no_paralog	ckl4	49.34	AT-PG:1.00	16/35	CdRAF5 CdRAF9 CdRAF36 CdRAF18/CdRAF26/CdRAF28 CdZIK1 CdRAF38 CdZIK3 CdRAF2/CdRAF4 CdZIK2 CdRAF6/CdRAF23 CdRAF12 CdRAF15/CdRAF25 CdRAF16/CdRAF30/CdRAF33 CdRAF29/CdRAF35 CdZIK4 CdRAF3	protein autophosphorylation	nucleus;cytoplasm	protein serine/threonine kinase activity;kinase activity
2	AT4G28880	no_paralog	ckl3	42.17	AT-PG:1.00	15/35	CdMEKK8 CdRAF5 CdRAF9 CdRAF36 CdRAF18/CdRAF26/CdRAF28 CdZIK1 CdRAF38 CdZIK3 CdRAF2/CdRAF4 CdZIK2 CdRAF6/CdRAF23 CdRAF12 CdRAF29/CdRAF35 CdZIK4 CdRAF3	na	na	kinase activity
3	AT3G23340	AT4G14340	ckl10	36.23	AT-PG:1.00	15/35	CdMEKK8 CdRAF5 CdRAF14 CdRAF9 CdRAF1 CdZIK1 CdRAF38 CdZIK3 CdRAF2/CdRAF4 CdZIK2 CdRAF6/CdRAF23 CdRAF12 CdRAF29/CdRAF35 CdZIK4 CdRAF3	na	na	kinase activity
4	AT4G28540	no_paralog	PAPK1	35.85	AT-PG:1.00	14/35	CdMEKK8 CdRAF5 CdRAF14 CdRAF9 CdZIK1 CdRAF38 CdZIK3 CdRAF2/CdRAF4 CdZIK2 CdRAF6/CdRAF23 CdRAF12 CdRAF29/CdRAF35 CdZIK4 CdRAF3	response to sucrose;response to glucose;response to fructose;D-xylose metabolic process;protein autophosphorylation	cytoplasm;cytoskeleton;plasmodesma;cortical microtubule	protein serine/threonine kinase activity;kinase activity
5	AT3G53570	no_paralog	FC1	32.75	AT-PG:1.00	14/35	CdRAF5 CdRAF9 CdRAF36 CdRAF1 CdZIK1 CdRAF38 CdZIK3 CdRAF2/CdRAF4 CdZIK2 CdRAF12 CdRAF29/CdRAF35 CdRAF8 CdZIK4 CdRAF3	regulation of transcription, DNA-templated;positive regulation of translation	nucleus;mitochondrion	protein binding;kinase activity
6	AT4G32660	no_paralog	AME3	31.04	AT-PG:1.00	13/35	CdRAF5 CdRAF9 CdRAF36 CdRAF1 CdZIK1 CdRAF38 CdRAF2/CdRAF4 CdZIK2 CdRAF12 CdRAF29/CdRAF35 CdRAF8 CdZIK4 CdRAF3	positive regulation of translation;protein autophosphorylation	nucleus;cytoplasm	protein serine/threonine kinase activity;kinase activity
7	AT5G67380	AT3G50000 AT2G23070	CKA1	30.76	AT-PG:1.00	12/35	CdRAF5 CdRAF36 CdRAF1 CdRAF18/CdRAF26/CdRAF28 CdRAF13 CdRAF38 CdRAF2/CdRAF4 CdRAF6/CdRAF23 CdRAF12 CdRAF15/CdRAF25 CdRAF8 CdRAF3	DNA repair;chromatin organization;circadian rhythm;response to UV-C;response to gamma radiation;photoperiodism, flowering;regulation of cell cycle;regulation of response to DNA damage stimulus	na	protein serine/threonine kinase activity;protein binding;kinase activity
8	AT1G72710	no_paralog	CKL2	29.3	AT-PG:1.00	12/35	CdMEKK8 CdRAF5 CdRAF14 CdRAF9 CdRAF38 CdZIK3 CdRAF2/CdRAF4 CdZIK2 CdRAF6/CdRAF23 CdRAF29/CdRAF35 CdZIK4 CdRAF3	protein N-linked glycosylation;cell wall biogenesis;cell wall macromolecule metabolic process	nucleus;cytoplasm;plasma membrane	kinase activity
9	AT1G51170	AT3G20830	UCN	29.23	AT-PG:1.00	14/35	CdRAF9 CdRAF36 CdRAF1 CdRAF37 CdRAF2/CdRAF4 CdRAF6/CdRAF23 CdRAF12 CdRAF16/CdRAF30/CdRAF33 CdRAF21 CdRAF29/CdRAF35 CdRAF8 CdRAF19 CdZIK4 CdRAF3	protein trans-autophosphorylation;negative regulation of cell division;integument development	nucleus;cytoplasm;plasma membrane;chloroplast	protein kinase activity;transcription factor binding;kinase activity
10	AT1G03930	AT5G44100	CKL9BETA	28.7	AT-PG:1.00	12/35	CdMEKK8 CdRAF5 CdRAF14 CdRAF9 CdRAF38 CdZIK3 CdRAF2/CdRAF4 CdZIK2 CdRAF12 CdRAF29/CdRAF35 CdZIK4 CdRAF3	signal transduction	nucleus;cytoplasm	protein serine/threonine/tyrosine kinase activity;kinase activity
11	AT1G04440	AT5G43320	CKL13	26.81	AT-PG:1.00	12/35	CdMEKK8 CdRAF5 CdRAF14 CdRAF9 CdRAF38 CdRAF2/CdRAF4 CdZIK2 CdRAF6/CdRAF23 CdRAF12 CdRAF29/CdRAF35 CdZIK4 CdRAF3	na	cytoplasm	kinase activity
12	AT3G29340	no_paralog	na	25.63	HS-HT:0.70 HS-LC:0.30	4/35	CdRAF5 CdRAF36 CdRAF6/CdRAF23 CdRAF8	regulation of transcription, DNA-templated	nucleus	nucleic acid binding;sequence-specific DNA binding transcription factor activity;zinc ion binding
13	AT4G14340	AT3G23340	CKL11	25.05	AT-PG:1.00	11/35	CdMEKK8 CdRAF5 CdRAF14 CdRAF9 CdZIK1 CdRAF38 CdZIK3 CdZIK2 CdRAF12 CdRAF29/CdRAF35 CdZIK4	phosphorylation;protein autophosphorylation	nucleus;cytoplasm	protein serine/threonine kinase activity;kinase activity
14	AT2G46700	no_paralog	CRK3	24.34	AT-PG:1.00	7/35	CdRAF5 CdRAF36 CdRAF38 CdRAF12 CdRAF15/CdRAF25 CdRAF29/CdRAF35 CdRAF8	leaf senescence;protein autophosphorylation	nucleus;plasma membrane	protein serine/threonine kinase activity;calcium-dependent protein serine/threonine phosphatase activity;calcium ion binding;protein binding;calmodulin binding;kinase activity
15	AT5G57565	no_paralog	na	23.9	AT-PG:1.00	10/35	CdMEKK8 CdMEKK3/CdMEKK5 CdMEKK11/CdMEKK12 CdZIK3 CdRAF2/CdRAF4 CdRAF6/CdRAF23 CdRAF21 CdRAF19 CdZIK4 CdRAF3	na	chloroplast	na
16	AT4G26100	no_paralog	CKL1	22.81	AT-PG:1.00	9/35	CdMEKK8 CdRAF14 CdZIK3 CdRAF2/CdRAF4 CdZIK2 CdRAF6/CdRAF23 CdRAF12 CdRAF29/CdRAF35 CdZIK4	na	nucleus;plasmodesma	kinase activity
17	AT3G20830	AT1G51170	UCNL	22.77	AT-PG:1.00	10/35	CdRAF1 CdZIK1 CdZIK3 CdRAF37 CdRAF2/CdRAF4 CdZIK2 CdRAF12 CdRAF21 CdZIK4 CdRAF3	response to auxin;response to brassinosteroid	nucleus	kinase activity
18	AT3G53640	no_paralog	na	20.58	AT-PG:1.00	7/35	CdRAF5 CdRAF1 CdZIK1 CdRAF2/CdRAF4 CdRAF15/CdRAF25 CdRAF29/CdRAF35 CdRAF3	na	nucleus	kinase activity
19	AT2G23080	no_paralog	CKA3	20.58	AT-PG:1.00	8/35	CdRAF36 CdRAF18/CdRAF26/CdRAF28 CdRAF13 CdRAF38 CdRAF6/CdRAF23 CdRAF12 CdRAF15/CdRAF25 CdRAF8	DNA repair;chromatin organization;circadian rhythm;response to mechanical stimulus;response to UV-C;response to gamma radiation;calcium-mediated signaling;regulation of cell cycle;regulation of response to DNA damage stimulus	nucleus	kinase activity
20	AT5G08160	no_paralog	PK3	19.62	AT-PG:1.00	8/35	CdMEKK3/CdMEKK5 CdMEKK1/CdMEKK2 CdRAF13 CdRAF24/CdRAF31 CdRAF6/CdRAF23 CdMEKK7 CdRAF15/CdRAF25 CdRAF11/CdRAF22/CdRAF34	positive regulation of translation	cytosol;plasma membrane	kinase activity
21	AT5G57015	no_paralog	ckl12	19.13	AT-PG:1.00	8/35	CdMEKK8 CdRAF5 CdZIK1 CdZIK3 CdZIK2 CdRAF6/CdRAF23 CdRAF29/CdRAF35 CdZIK4	na	cytoplasm	kinase activity
22	AT2G41930	no_paralog	na	17.73	AT-PG:1.00	5/35	CdRAF5 CdRAF9 CdRAF36 CdRAF38 CdRAF12	na	plasma membrane	kinase activity
23	AT4G38230	no_paralog	CPK26	17.43	AT-PG:1.00	9/35	CdRAF9 CdRAF36 CdRAF18/CdRAF26/CdRAF28 CdRAF24/CdRAF31 CdRAF38 CdRAF37 CdRAF29/CdRAF35 CdRAF8 CdRAF3	protein phosphorylation;plant-type cell wall modification;pollen tube growth	nucleus	calmodulin-dependent protein kinase activity;kinase activity
24	AT1G77720	no_paralog	PPK1	17.03	AT-PG:1.00	5/35	CdRAF5 CdZIK1 CdRAF38 CdRAF12 CdRAF15/CdRAF25	microtubule cytoskeleton organization;cytokinesis by cell plate formation;DNA methylation;chromatin silencing;methylation-dependent chromatin silencing;cell-cell signaling;virus induced gene silencing;regulation of flower development;production of ta-siRNAs involved in RNA interference;histone modification;gene silencing by RNA;chromatin silencing by small RNA;production of miRNAs involved in gen…	nucleus	protein serine/threonine kinase activity;kinase activity
25	AT3G25840	AT1G13350	na	16.95	AT-PG:1.00	6/35	CdRAF5 CdRAF1 CdRAF2/CdRAF4 CdRAF6/CdRAF23 CdRAF8 CdRAF3	nuclear-transcribed mRNA catabolic process;protein phosphorylation;protein glycosylation	nucleus;cytoplasm	protein kinase activity;ATP binding
26	AT3G25250	AT4G13000	OXI1	16.93	AT-PG:1.00	6/35	CdZIK1 CdZIK3 CdRAF2/CdRAF4 CdZIK2 CdRAF15/CdRAF25 CdZIK4	protein phosphorylation;response to oxidative stress;response to wounding;response to chitin	na	protein kinase activity;protein binding;kinase activity;protein kinase binding
27	AT1G13350	AT3G25840	na	15.32	AT-PG:1.00	6/35	CdRAF5 CdMEKK3/CdMEKK5 CdRAF1 CdZIK1 CdRAF2/CdRAF4 CdRAF3	na	nucleus;cytoplasm	protein kinase activity
28	AT1G30090	no_paralog	na	15.32	HS-LC:0.74 HS-CX:0.26	4/35	CdZIK1 CdZIK3 CdZIK2 CdZIK4	na	cytoplasm	na
29	AT2G41910	no_paralog	na	14.62	AT-PG:1.00	5/35	CdRAF5 CdRAF9 CdZIK3 CdRAF10/CdRAF17 CdZIK4	na	na	kinase activity
30	AT4G28980	no_paralog	CDKF;1	14.15	AT-PG:1.00	6/35	CdMEKK8 CdRAF1 CdZIK1 CdRAF38 CdRAF2/CdRAF4 CdRAF3	regulation of cyclin-dependent protein serine/threonine kinase activity;mitotic cell cycle;protein phosphorylation;maintenance of root meristem identity;stomatal lineage progression;DNA endoreduplication;negative regulation of cyclin-dependent protein serine/threonine kinase activity	nucleus;cytoplasm;cytosol	protein serine/threonine kinase activity;protein binding;kinase activity;cyclin-dependent protein kinase activating kinase activity
31	AT4G08800	no_paralog	na	13.74	AT-PG:1.00	6/35	CdRAF14 CdRAF2/CdRAF4 CdZIK2 CdRAF6/CdRAF23 CdZIK4 CdRAF3	na	cytoplasm;plasma membrane	kinase activity
32	AT5G24270	no_paralog	SOS3	13.71	HS-LC:1.00	6/35	CdRAF20/CdRAF27 CdRAF18/CdRAF26/CdRAF28 CdRAF13 CdRAF15/CdRAF25 CdRAF10/CdRAF17 CdRAF16/CdRAF30/CdRAF33	detection of calcium ion;stomatal movement;calcium-mediated signaling;cellular potassium ion homeostasis;hypotonic salinity response	cytoplasm;plasma membrane;calcineurin complex	calcium-dependent protein serine/threonine phosphatase activity;calcium ion binding;protein binding
33	AT3G17750	no_paralog	na	13.58	AT-PG:0.83 AT-CX:0.17	5/35	CdZIK1 CdZIK3 CdZIK2 CdRAF15/CdRAF25 CdRAF29/CdRAF35	na	nucleus;cytosol;plasma membrane	kinase activity
34	AT2G19470	no_paralog	ckl5	12.64	AT-PG:1.00	5/35	CdMEKK8 CdRAF14 CdZIK1 CdZIK3 CdZIK4	na	cytoplasm	kinase activity
35	AT2G17890	AT4G36070 AT5G66210	CPK16	12.53	AT-PG:1.00	3/35	CdRAF5 CdRAF9 CdRAF8	protein phosphorylation	plasma membrane;chloroplast	protein kinase activity;calmodulin-dependent protein kinase activity
36	AT1G73580	no_paralog	na	12.39	HS-LC:1.00	6/35	CdRAF5 CdRAF36 CdZIK1 CdZIK3 CdRAF8 CdMEKK9/CdMEKK10	na	na	na
37	AT5G66210	AT2G17890 AT4G36070	CPK28	12.26	AT-PG:0.65 AT-CC:0.35	3/35	CdRAF5 CdMEKK11/CdMEKK12 CdRAF8	protein phosphorylation;response to chitin	plasma membrane;chloroplast	calmodulin-dependent protein kinase activity
38	AT1G73450	no_paralog	na	12.26	AT-PG:1.00	5/35	CdZIK1 CdZIK3 CdZIK2 CdRAF15/CdRAF25 CdZIK4	na	nucleus;cytosol;plasma membrane	kinase activity
39	AT1G73460	no_paralog	na	12.22	AT-PG:1.00	5/35	CdZIK1 CdZIK3 CdZIK2 CdRAF15/CdRAF25 CdZIK4	na	nucleus;cytoplasm;cytosol;plasma membrane	kinase activity
40	AT5G11410	no_paralog	na	12.21	AT-PG:1.00	5/35	CdMEKK11/CdMEKK12 CdZIK1 CdZIK2 CdMEKK7 CdZIK4	na	plasma membrane	kinase activity
41	AT4G29810	no_paralog	MKK2	11.93	AT-LC:0.35 AT-HT:0.35 HS-LC:0.31	4/35	CdRAF13 CdMEKK4/CdMEKK6 CdRAF15/CdRAF25 CdRAF11/CdRAF22/CdRAF34	MAPK cascade;glycolytic process;regulation of transcription, DNA-templated;protein targeting to membrane;water transport;response to osmotic stress;hyperosmotic response;Golgi organization;cell communication;response to temperature stimulus;response to cold;detection of biotic stimulus;response to bacterium;systemic acquired resistance;cold acclimation;response to salt stress;salicylic acid biosy…	cytoplasm;plasma membrane	MAP kinase kinase activity;protein binding;kinase activity
42	AT2G36930	no_paralog	na	11.74	HS-LC:1.00	4/35	CdRAF5 CdRAF36 CdRAF6/CdRAF23 CdRAF8	na	na	na
43	AT4G24740	no_paralog	FC2	11.69	AT-PG:1.00	6/35	CdRAF5 CdRAF9 CdRAF36 CdRAF1 CdRAF38 CdRAF12	mRNA processing;positive regulation of translation;protein autophosphorylation	nucleus	protein kinase activity;protein serine/threonine kinase activity;protein binding;kinase activity
44	AT5G44100	AT1G03930	ckl7	11.62	AT-PG:1.00	6/35	CdRAF5 CdRAF9 CdRAF38 CdRAF2/CdRAF4 CdRAF29/CdRAF35 CdRAF3	na	cytoplasm	kinase activity
45	AT5G52640	no_paralog	HSP90.1	11.47	HS-LC:1.00	5/35	CdRAF9 CdZIK1 CdRAF38 CdRAF11/CdRAF22/CdRAF34 CdMEKK9/CdMEKK10	protein folding;response to heat;response to high light intensity;defense response to bacterium, incompatible interaction;response to hydrogen peroxide;defense response to bacterium;response to arsenic-containing substance	cell wall;cytoplasm;cytosol;plasma membrane	protein binding
46	AT5G10020	no_paralog	na	11.26	AT-PG:1.00	5/35	CdMEKK8 CdMEKK3/CdMEKK5 CdMEKK1/CdMEKK2 CdZIK1 CdMEKK7	protein phosphorylation;microtubule nucleation;transmembrane receptor protein tyrosine kinase signaling pathway;plant-type cell wall organization;cell wall modification	cytosol;plasma membrane	protein serine/threonine kinase activity;ATP binding
47	AT3G50000	AT5G67380	CKA2	10.96	AT-PG:1.00	4/35	CdRAF13 CdRAF15/CdRAF25 CdRAF29/CdRAF35 CdRAF3	DNA repair;chromatin organization;circadian rhythm;response to UV-C;response to gamma radiation;regulation of cell cycle;regulation of response to DNA damage stimulus	cytosol;plasma membrane	protein binding;kinase activity
48	AT5G40030	no_paralog	na	10.78	AT-PG:1.00	4/35	CdZIK1 CdZIK3 CdRAF37 CdZIK2	na	nucleus	protein binding;kinase activity
49	AT2G23070	AT5G67380	na	10.64	AT-PG:0.79 AT-HT:0.21	5/35	CdRAF36 CdRAF1 CdZIK2 CdRAF15/CdRAF25 CdRAF8	na	nucleus;cytosol	kinase activity
50	AT4G13000	AT3G25250	na	10.15	AT-PG:1.00	4/35	CdZIK1 CdZIK3 CdZIK2 CdZIK4	protein autophosphorylation	nucleus	protein serine/threonine kinase activity;kinase activity
51	AT5G27790	no_paralog	na	10.1	AT-PG:1.00	4/35	CdZIK1 CdZIK3 CdZIK2 CdZIK4	na	na	kinase activity
52	AT3G54180	AT2G38620	CDKB1;1	9.31	AT-PG:0.64 AT-CX:0.36	3/35	CdRAF1 CdMEKK13 CdRAF38	unidimensional cell growth;stomatal complex formation;DNA endoreduplication;cotyledon development	nucleus;cytoplasm	cyclin-dependent protein serine/threonine kinase activity;protein binding;kinase activity
53	AT1G68830	no_paralog	STN7	9.2	AT-PG:1.00	4/35	CdMEKK8 CdMEKK3/CdMEKK5 CdMEKK1/CdMEKK2 CdRAF6/CdRAF23	circadian rhythm;chlorophyll catabolic process;regulation of photosynthesis, light reaction	chloroplast	protein kinase activity;kinase activity
54	AT5G03320	AT3G09830	na	9.07	AT-PG:1.00	3/35	CdZIK1 CdZIK3 CdZIK2	na	plasma membrane	kinase activity
55	AT2G18915	no_paralog	LKP2	9.04	AT-DC:1.00	2/35	CdRAF9 CdRAF38	ubiquitin-dependent protein catabolic process;lipid transport;circadian rhythm;response to red or far red light;regulation of circadian rhythm;long-day photoperiodism, flowering	nucleus;cytosol;Cajal body	ubiquitin-protein ligase activity;protein binding
56	AT1G68050	no_paralog	FKF1	9.04	AT-DC:1.00	2/35	CdRAF9 CdRAF38	regulation of transcription, DNA-templated;ubiquitin-dependent protein catabolic process;circadian rhythm;response to blue light;positive regulation of flower development;regulation of gene expression	nucleus	core promoter binding;ubiquitin-protein ligase activity;protein binding
57	AT2G02710	no_paralog	PLPC	9.04	AT-DC:1.00	2/35	CdRAF9 CdRAF38	regulation of transcription, DNA-templated;signal transduction;regulation of proton transport;protein autophosphorylation	plasma membrane	signal transducer activity
58	AT1G09570	no_paralog	PHYA	9.04	AT-DC:1.00	2/35	CdRAF9 CdRAF38	regulation of transcription, DNA-templated;circadian rhythm;gravitropism;phototropism;photomorphogenesis;red or far-red light signaling pathway;red light signaling pathway;response to continuous far red light stimulus by the high-irradiance response system;response to very low fluence red light stimulus;negative regulation of translation;response to arsenic-containing substance	nucleus;cytoplasm;nuclear body	protein histidine kinase activity;signal transducer activity;protein binding;G-protein coupled photoreceptor activity;red or far-red light photoreceptor activity;far-red light photoreceptor activity;identical protein binding
59	AT5G35840	no_paralog	PHYC	9.04	AT-DC:1.00	2/35	CdRAF9 CdRAF38	circadian rhythm;gravitropism;red or far-red light signaling pathway;regulation of proton transport;protein autophosphorylation	na	protein histidine kinase activity;protein binding
60	AT5G57360	AT2G18910	ZTL	9.04	AT-DC:1.00	2/35	CdRAF9 CdRAF38	ubiquitin-dependent protein catabolic process;fatty acid beta-oxidation;circadian rhythm;response to red or far red light;flower development;response to red light;proteasomal protein catabolic process;protein import into peroxisome matrix;SCF-dependent proteasomal ubiquitin-dependent protein catabolic process;regulation of circadian rhythm;entrainment of circadian clock by photoperiod;cellular ma…	nucleus;cytosol;SCF ubiquitin ligase complex	ubiquitin-protein ligase activity;protein binding;blue light photoreceptor activity
61	AT2G18790	no_paralog	PHYB	9	AT-DC:1.00	2/35	CdRAF9 CdRAF38	chromatin organization;regulation of transcription, DNA-templated;circadian rhythm;response to cold;gravitropism;phototropism;photomorphogenesis;entrainment of circadian clock;abscisic acid metabolic process;jasmonic acid mediated signaling pathway;red or far-red light signaling pathway;regulation of seed germination;transpiration;regulation of proton transport;red light signaling pathway;respons…	nucleus;cytosol;plasma membrane;nuclear body	protein histidine kinase activity;signal transducer activity;protein binding;G-protein coupled photoreceptor activity;red or far-red light photoreceptor activity;far-red light photoreceptor activity;red light photoreceptor activity;identical protein binding
62	AT4G16250	no_paralog	PHYD	9	AT-DC:1.00	2/35	CdRAF9 CdRAF38	regulation of transcription, DNA-templated;circadian rhythm;gravitropism;red or far-red light signaling pathway;regulation of proton transport;protein autophosphorylation	nucleus	signal transducer activity;protein binding;G-protein coupled photoreceptor activity;red or far-red light photoreceptor activity;identical protein binding
63	AT4G18130	no_paralog	PHYE	9	AT-DC:1.00	2/35	CdRAF9 CdRAF38	methylation-dependent chromatin silencing;regulation of transcription, DNA-templated;regulation of proton transport;RNA interference;protein autophosphorylation	na	protein histidine kinase activity;signal transducer activity;protein binding;G-protein coupled photoreceptor activity
64	AT5G03640	no_paralog	na	8.93	AT-PG:1.00	4/35	CdMEKK8 CdZIK2 CdZIK4 CdRAF3	na	nucleus	kinase activity
65	AT2G35050	no_paralog	na	8.78	AT-CC:1.00	2/35	CdRAF37 CdRAF16/CdRAF30/CdRAF33	protein phosphorylation;protein glycosylation	nucleus	protein kinase activity;protein serine/threonine/tyrosine kinase activity
66	AT4G36070	AT2G17890 AT5G66210	CPK18	8.44	AT-PG:1.00	2/35	CdRAF5 CdRAF8	protein phosphorylation	nucleus	calmodulin-dependent protein kinase activity
67	AT4G02060	no_paralog	PRL	8.37	HS-LC:0.73 AT-CX:0.27	4/35	CdRAF5 CdRAF36 CdMEKK13 CdRAF8	DNA replication;DNA unwinding involved in DNA replication;DNA replication initiation;DNA methylation;chromatin silencing;cell proliferation;sugar mediated signaling pathway;histone H3-K9 methylation	nucleus;cytoplasm	DNA binding;protein binding;ATP binding;DNA-dependent ATPase activity
68	AT3G18040	no_paralog	MPK9	8.25	AT-CC:1.00	2/35	CdMEKK13 CdRAF12	signal transduction;abscisic acid-activated signaling pathway	nucleus;mitochondrion;cytosol	MAP kinase activity
69	AT5G56030	no_paralog	HSP90.2	8.25	HS-LC:1.00	4/35	CdRAF9 CdRAF38 CdRAF11/CdRAF22/CdRAF34 CdMEKK9/CdMEKK10	protein folding;defense response;response to heat;response to water deprivation;response to mechanical stimulus;response to salt stress;defense response to bacterium, incompatible interaction;flower development;negative regulation of seed germination;heat acclimation;calcium-mediated signaling;leaf development;protein stabilization;stomatal closure	cell wall;nucleus;cytoplasm;mitochondrion;Golgi apparatus;cytosol;plasmodesma	protein binding;ATP binding;ATPase activity
70	AT5G56010	no_paralog	Hsp81.3	8.24	HS-LC:1.00	4/35	CdRAF9 CdRAF38 CdRAF11/CdRAF22/CdRAF34 CdMEKK9/CdMEKK10	protein folding;response to heat;cellular response to calcium ion	nucleolus;cytoplasm;Golgi apparatus;cytosol;plasma membrane;membrane	ATP binding
71	AT2G35890	no_paralog	CPK25	8.18	AT-PG:1.00	2/35	CdRAF36 CdRAF29/CdRAF35	protein phosphorylation	nucleus	calmodulin-dependent protein kinase activity;kinase activity
72	AT5G56000	no_paralog	Hsp81.4	8.17	HS-LC:1.00	4/35	CdRAF9 CdRAF38 CdRAF11/CdRAF22/CdRAF34 CdMEKK9/CdMEKK10	protein folding	cell wall;nucleus;cytoplasm;vacuolar membrane;Golgi apparatus;cytosol;plasma membrane;chloroplast stroma;apoplast	ATP binding
73	AT2G01210	AT1G66830	na	8.1	AT-PG:1.00	4/35	CdMEKK8 CdZIK1 CdZIK3 CdZIK4	methylation-dependent chromatin silencing;protein phosphorylation;transmembrane receptor protein tyrosine kinase signaling pathway;RNA interference;chromatin silencing by small RNA;petal formation;sepal formation;histone H3-K9 methylation	plasma membrane;plant-type cell wall;chloroplast;chloroplast stroma	protein serine/threonine kinase activity;ATP binding;kinase activity
74	AT5G09890	no_paralog	na	7.99	AT-PG:0.76 HS-LC:0.24	3/35	CdRAF2/CdRAF4 CdZIK4 CdMEKK9/CdMEKK10	na	cytoplasm;cytosol	kinase activity
75	AT3G57720	no_paralog	na	7.82	AT-PG:1.00	4/35	CdMEKK11/CdMEKK12 CdMEKK7 CdZIK4 CdMEKK9/CdMEKK10	na	na	kinase activity
76	AT2G29550	no_paralog	TUB7	7.79	HS-LC:0.77 AT-CX:0.23	4/35	CdRAF13 CdMEKK13 CdRAF15/CdRAF25 CdMEKK9/CdMEKK10	gluconeogenesis;cytoskeleton organization;microtubule-based process;response to salt stress;regulation of meristem growth;proteasomal protein catabolic process;response to cadmium ion	cell wall;cytoplasm;vacuole;Golgi apparatus;cytosol;plasma membrane;plasmodesma;tubulin complex	structural constituent of cytoskeleton
77	AT2G40500	no_paralog	na	7.74	AT-PG:1.00	3/35	CdRAF37 CdRAF6/CdRAF23 CdRAF3	na	nucleus	kinase activity
78	AT1G78300	no_paralog	GRF2	7.72	HS-LC:1.00	3/35	CdRAF13 CdRAF15/CdRAF25 CdMEKK9/CdMEKK10	brassinosteroid mediated signaling pathway	cytoplasm;vacuole;vacuolar membrane;Golgi apparatus;cytosol;plasma membrane	protein phosphorylated amino acid binding
79	AT3G24140	no_paralog	FMA	7.65	AT-CC:1.00	2/35	CdRAF20/CdRAF27 CdMEKK1/CdMEKK2	MAPK cascade;regulation of transcription, DNA-templated;protein targeting to membrane;response to bacterium;systemic acquired resistance, salicylic acid mediated signaling pathway;jasmonic acid mediated signaling pathway;leaf morphogenesis;guard cell differentiation;stomatal complex morphogenesis;regulation of hydrogen peroxide metabolic process;regulation of plant-type hypersensitive response;ce…	nucleus	DNA binding;sequence-specific DNA binding transcription factor activity
80	AT2G14120	AT4G33650	DRP3B	7.57	HS-LC:1.00	3/35	CdRAF20/CdRAF27 CdRAF13 CdRAF15/CdRAF25	mitochondrial fission;nuclear-transcribed mRNA catabolic process;post-embryonic development;peroxisome fission	mitochondrion;peroxisome;cytosol;plasma membrane	GTPase activity;protein binding;GTP binding
81	AT4G04695	no_paralog	CPK31	7.48	AT-PG:1.00	2/35	CdRAF5 CdRAF15/CdRAF25	protein phosphorylation;response to salicylic acid	plasma membrane	calmodulin-dependent protein kinase activity;kinase activity
82	AT4G37910	no_paralog	mtHsc70-1	7.46	HS-LC:1.00	3/35	CdMEKK3/CdMEKK5 CdMEKK1/CdMEKK2 CdMEKK9/CdMEKK10	gluconeogenesis;glycolytic process;protein folding;nucleotide biosynthetic process;response to salt stress;methylglyoxal catabolic process to D-lactate;response to cadmium ion	cell wall;mitochondrion;mitochondrial matrix;vacuolar membrane	ATP binding;zinc ion binding
83	AT5G21274	no_paralog	CAM6	7.42	AT-LC:1.00	2/35	CdMEKK13 CdRAF37	calcium-mediated signaling	na	calcium ion binding;protein binding
84	AT5G43020	no_paralog	na	7.38	AT-PG:1.00	3/35	CdZIK3 CdZIK2 CdRAF19	cytokinesis by cell plate formation;protein phosphorylation;transmembrane receptor protein tyrosine kinase signaling pathway	plasma membrane	protein serine/threonine kinase activity;ATP binding;kinase activity
85	AT5G14720	no_paralog	na	7.38	HS-LC:0.75 AT-CX:0.25	4/35	CdZIK1 CdZIK3 CdZIK2 CdRAF15/CdRAF25	na	nucleus;plasma membrane	kinase activity
86	AT5G47750	no_paralog	PK5	7.28	AT-PG:1.00	3/35	CdZIK1 CdRAF2/CdRAF4 CdZIK2	microtubule cytoskeleton organization;cytokinesis by cell plate formation	nucleus;nucleolus;cytoplasm	protein binding;kinase activity
87	AT4G04710	AT4G21940 AT1G61950	CPK22	7.03	AT-PG:1.00	2/35	CdRAF12 CdRAF15/CdRAF25	protein phosphorylation	plasma membrane;plasmodesma	calmodulin-dependent protein kinase activity;kinase activity
88	AT1G35160	AT4G09000 AT1G22300	GRF4	7.02	HS-LC:1.00	3/35	CdRAF13 CdRAF15/CdRAF25 CdMEKK9/CdMEKK10	brassinosteroid mediated signaling pathway	nucleus;nuclear envelope;cytoplasm;Golgi apparatus;cytosol;plasma membrane	protein binding;protein phosphorylated amino acid binding
89	AT5G12250	no_paralog	TUB6	7	HS-LC:1.00	3/35	CdRAF13 CdRAF15/CdRAF25 CdMEKK9/CdMEKK10	polysaccharide biosynthetic process;acetyl-CoA metabolic process;gluconeogenesis;glycolytic process;water transport;hyperosmotic response;cytoskeleton organization;microtubule-based process;Golgi organization;response to temperature stimulus;response to cold;response to salt stress;gibberellic acid mediated signaling pathway;multidimensional cell growth;cell tip growth;seed dormancy process;prote…	cytoplasm;plasma membrane;microtubule cytoskeleton	structural constituent of cytoskeleton
90	AT1G79930	no_paralog	HSP91	6.97	HS-LC:1.00	3/35	CdMEKK3/CdMEKK5 CdMEKK1/CdMEKK2 CdMEKK9/CdMEKK10	protein folding;response to heat;response to cadmium ion	nucleus;cytoplasm;cytosol;plasma membrane	ATP binding
91	AT3G22480	no_paralog	PDF2	6.93	HS-LC:1.00	3/35	CdMEKK3/CdMEKK5 CdMEKK1/CdMEKK2 CdMEKK9/CdMEKK10	na	cytoplasm	na
92	AT1G16440	AT1G79250	RSH3	6.9	AT-PG:1.00	3/35	CdZIK1 CdZIK3 CdZIK2	na	plasma membrane;chloroplast	kinase activity
93	AT4G09000	AT1G35160	GRF1	6.86	HS-LC:1.00	3/35	CdRAF13 CdRAF15/CdRAF25 CdMEKK9/CdMEKK10	response to cadmium ion	nucleus;cytoplasm;vacuole;Golgi apparatus;cytosol;plasma membrane;plasmodesma;chloroplast;chloroplast stroma;membrane;apoplast	protein phosphorylated amino acid binding
94	AT3G01840	no_paralog	LYK2	6.82	AT-PG:1.00	3/35	CdMEKK8 CdMEKK7 CdRAF19	na	chloroplast	kinase activity
95	AT2G25880	AT4G32830	AUR2	6.73	AT-PG:1.00	3/35	CdZIK2 CdRAF19 CdZIK4	chromatin silencing;cell proliferation;regulation of meristem growth;stomatal complex morphogenesis;histone phosphorylation;regulation of cell proliferation;histone H3-K9 methylation	nucleus	kinase activity;histone kinase activity (H3-S10 specific)
96	AT2G40940	no_paralog	ERS1	6.72	AT-LC:0.62 AT-CX:0.38	1/35	CdRAF29/CdRAF35	negative regulation of ethylene-activated signaling pathway	endoplasmic reticulum	protein histidine kinase activity;receptor activity;protein binding;ethylene binding
97	AT1G79250	AT1G16440	AGC1.7	6.54	AT-PG:1.00	3/35	CdZIK1 CdZIK3 CdZIK2	unidimensional cell growth;plant-type cell wall modification;pollen tube growth	na	protein binding;kinase activity
98	AT2G42550	no_paralog	na	6.46	AT-PG:1.00	2/35	CdRAF14 CdZIK3	na	na	kinase activity
99	AT3G15890	no_paralog	na	6.39	AT-PG:1.00	2/35	CdMEKK8 CdMEKK7	na	plasma membrane	kinase activity
100	AT1G02580	no_paralog	SDG5	6.35	HS-LC:1.00	3/35	CdRAF5 CdRAF36 CdRAF8	regulation of gene expression by genetic imprinting;response to absence of light;vernalization response;histone methylation;negative regulation of transcription, DNA-templated;seed morphogenesis;regulation of endosperm development	nucleus	sequence-specific DNA binding transcription factor activity;protein binding;sequence-specific DNA binding
101	AT4G02020	no_paralog	SWN	6.35	HS-LC:1.00	3/35	CdRAF5 CdRAF36 CdRAF8	nuclear-transcribed mRNA catabolic process;DNA methylation;chromatin silencing;regulation of gene expression by genetic imprinting;regulation of transcription, DNA-templated;cell-cell signaling;virus induced gene silencing;endosperm development;vernalization response;vegetative phase change;production of ta-siRNAs involved in RNA interference;histone methylation;production of miRNAs involved in g…	nucleus;chromatin silencing complex;plasmodesma	sequence-specific DNA binding transcription factor activity;single-stranded RNA binding;protein binding
102	AT2G20470	no_paralog	na	6.35	AT-PG:0.52 HS-LC:0.48	2/35	CdRAF2/CdRAF4 CdMEKK9/CdMEKK10	plant-type cell wall modification	cytoplasm	kinase activity
103	AT3G23310	AT4G14350	na	6.29	AT-PG:0.51 HS-LC:0.49	2/35	CdRAF2/CdRAF4 CdMEKK9/CdMEKK10	na	nucleus;cytosol;plasma membrane	kinase activity
104	AT3G17980	AT1G48590	C2	6.27	HS-LC:1.00	3/35	CdZIK1 CdRAF8 CdMEKK9/CdMEKK10	na	na	na
105	AT3G17590	no_paralog	CHE1	6.25	HS-LC:1.00	3/35	CdRAF5 CdRAF36 CdRAF8	chromatin modification;regulation of gene expression, epigenetic	nucleus	chromatin binding;protein binding
106	AT5G20570	AT3G42830	ROC1	6.18	HS-LC:1.00	3/35	CdRAF5 CdRAF36 CdRAF8	ubiquitin-dependent protein catabolic process;response to auxin;photorespiration;protein ubiquitination;protein sumoylation;DNA endoreduplication;regulation of circadian rhythm;proteasome-mediated ubiquitin-dependent protein catabolic process;proteasome assembly;regulation of unidimensional cell growth;response to misfolded protein;proteasome core complex assembly	nucleus;SCF ubiquitin ligase complex;Cul3-RING ubiquitin ligase complex	protein binding
107	AT3G07780	AT5G48160	OBE1	6.09	AT-HT:1.00	2/35	CdRAF15/CdRAF25 CdRAF11/CdRAF22/CdRAF34	embryo development ending in seed dormancy;root meristem specification;maintenance of root meristem identity;regulation of gene expression;maintenance of shoot apical meristem identity;regulation of defense response;transport of virus in host, cell to cell;primary root development	nucleus;plastid	protein binding;protein homodimerization activity;protein heterodimerization activity
108	AT5G62700	no_paralog	TUB3	6.05	HS-LC:1.00	3/35	CdRAF13 CdRAF15/CdRAF25 CdMEKK9/CdMEKK10	na	cell wall;cytoplasm;Golgi apparatus;plasmodesma;tubulin complex	structural molecule activity
109	AT5G62690	no_paralog	TUB2	6.05	HS-LC:1.00	3/35	CdRAF13 CdRAF15/CdRAF25 CdMEKK9/CdMEKK10	response to salt stress;response to cadmium ion	cell wall;nucleolus;cytoplasm;Golgi apparatus;plasma membrane;plasmodesma;tubulin complex	structural molecule activity
110	AT5G23860	no_paralog	TUB8	6.01	HS-LC:1.00	3/35	CdRAF13 CdRAF15/CdRAF25 CdMEKK9/CdMEKK10	gluconeogenesis;cytoskeleton organization;microtubule-based process;response to salt stress;proteasomal protein catabolic process	cytoplasm;Golgi apparatus;membrane;tubulin complex	structural constituent of cytoskeleton;protein binding
111	AT3G02520	AT5G16050	GRF7	5.93	HS-LC:1.00	3/35	CdRAF13 CdRAF15/CdRAF25 CdMEKK9/CdMEKK10	protein glycosylation;ER to Golgi vesicle-mediated transport;toxin catabolic process;amino acid import	nuclear envelope;cytoplasm;Golgi apparatus;plasma membrane;plasmodesma;chloroplast;chloroplast stroma	protein phosphorylated amino acid binding
112	AT2G24540	no_paralog	AFR	5.85	HS-LC:1.00	3/35	CdZIK1 CdZIK3 CdZIK2	red, far-red light phototransduction;response to sucrose;flavonoid biosynthetic process;red or far-red light signaling pathway;response to UV-B;myo-inositol hexakisphosphate biosynthetic process	cytoplasm	protein binding
113	AT4G00340	no_paralog	RLK4	5.78	AT-PG:1.00	2/35	CdMEKK3/CdMEKK5 CdZIK3	protein phosphorylation	plasma membrane;membrane	protein kinase activity;carbohydrate binding
114	AT5G38480	no_paralog	RCI1	5.76	HS-LC:1.00	3/35	CdRAF13 CdRAF15/CdRAF25 CdMEKK9/CdMEKK10	toxin catabolic process	cell wall;cytoplasm;mitochondrion;vacuole;Golgi apparatus;cytosol;plasma membrane;plasmodesma;chloroplast	ATP binding;protein phosphorylated amino acid binding
115	AT5G43320	AT1G04440	ckl8	5.75	AT-PG:1.00	3/35	CdRAF36 CdRAF38 CdRAF6/CdRAF23	protein targeting to vacuole;vegetative to reproductive phase transition of meristem;vesicle-mediated transport;endosomal transport;protein desumoylation;Golgi vesicle transport;hydrogen peroxide biosynthetic process	na	kinase activity
116	AT3G09830	AT5G03320	na	5.71	AT-PG:1.00	2/35	CdZIK1 CdZIK3	protein targeting to membrane;systemic acquired resistance;ethylene biosynthetic process;salicylic acid biosynthetic process;regulation of plant-type hypersensitive response;regulation of defense response;negative regulation of programmed cell death	plasma membrane	kinase activity
117	AT5G16050	AT3G02520	GRF5	5.65	HS-LC:1.00	3/35	CdRAF13 CdRAF15/CdRAF25 CdMEKK9/CdMEKK10	toxin catabolic process;response to cadmium ion	cell wall;nuclear envelope;cytoplasm;mitochondrion;Golgi apparatus;cytosol;plasma membrane;chloroplast stroma	ATP binding;protein phosphorylated amino acid binding
118	AT1G03920	no_paralog	na	5.62	AT-PG:0.57 HS-LC:0.43	2/35	CdRAF2/CdRAF4 CdMEKK9/CdMEKK10	na	nucleus;cytosol;plasma membrane	kinase activity
119	AT4G21440	AT4G05100	MYB102	5.6	AT-CC:0.67 AT-CX:0.33	2/35	CdMEKK4/CdMEKK6 CdRAF3	regulation of transcription, DNA-templated;response to osmotic stress;signal transduction;response to water deprivation;response to wounding;response to salt stress;response to ethylene;response to auxin;response to abscisic acid;abscisic acid-activated signaling pathway;response to jasmonic acid;proline transport;hyperosmotic salinity response	nucleus	DNA binding;sequence-specific DNA binding transcription factor activity
120	AT1G79640	no_paralog	na	5.57	HS-LC:1.00	3/35	CdZIK1 CdZIK3 CdZIK2	na	nucleus	kinase activity
121	AT5G67080	AT3G50310	MAPKKK19	5.5	AT-PG:1.00	2/35	CdZIK1 CdZIK2	response to water deprivation;response to ethylene;response to abscisic acid;abscisic acid-activated signaling pathway;intracellular signal transduction;hyperosmotic salinity response	plasma membrane	kinase activity
122	AT2G05060	no_paralog	na	5.48	AT-PG:1.00	2/35	CdZIK1 CdZIK3	na	nucleus	kinase activity
123	AT1G16270	AT1G79570	na	5.41	AT-CX:1.00	1/35	CdRAF1	protein phosphorylation	nucleus;cytosol;plasma membrane	protein kinase activity;protein serine/threonine/tyrosine kinase activity
124	AT5G14640	no_paralog	SK13	5.34	AT-PG:0.67 HS-LC:0.33	2/35	CdRAF12 CdRAF15/CdRAF25	hyperosmotic response;response to salt stress;protein autophosphorylation	cytosol;chloroplast	protein kinase activity;protein serine/threonine kinase activity
125	AT1G08810	no_paralog	MYB60	5.34	AT-CC:1.00	1/35	CdRAF20/CdRAF27	regulation of transcription, DNA-templated;response to water deprivation;response to light stimulus;response to abscisic acid;response to salicylic acid;response to jasmonic acid;stomatal movement	nucleus	DNA binding;sequence-specific DNA binding transcription factor activity
126	AT5G06950	AT3G12250	TGA2	5.26	AT-CC:1.00	1/35	CdRAF5	sister chromatid cohesion;response to xenobiotic stimulus;response to bacterium;systemic acquired resistance, salicylic acid mediated signaling pathway;endoplasmic reticulum unfolded protein response;chromatin silencing by small RNA;meiotic chromosome segregation;negative regulation of transcription, DNA-templated;positive regulation of transcription, DNA-templated;positive regulation of cellular…	nucleus;cytoplasm	DNA binding;sequence-specific DNA binding transcription factor activity;protein binding
127	AT5G12480	no_paralog	CPK7	5.25	AT-PG:1.00	2/35	CdRAF2/CdRAF4 CdRAF15/CdRAF25	protein phosphorylation	nucleus;plasma membrane	calmodulin-dependent protein kinase activity;kinase activity
128	AT5G60090	no_paralog	na	5.2	AT-PG:1.00	2/35	CdZIK1 CdZIK4	na	plasma membrane	kinase activity
129	AT5G24360	no_paralog	IRE1-1	5.17	AT-PG:1.00	2/35	CdZIK1 CdZIK3	RNA splicing, via endonucleolytic cleavage and ligation;RNA splicing;response to salicylic acid;defense response to bacterium, incompatible interaction;glucuronoxylan metabolic process;endoplasmic reticulum unfolded protein response;autophagy in response to ER overload;xylan biosynthetic process	endoplasmic reticulum	endoribonuclease activity;kinase activity
130	AT3G57700	no_paralog	na	5.11	AT-PG:1.00	2/35	CdMEKK8 CdMEKK7	MAPK cascade;ethylene biosynthetic process;salicylic acid biosynthetic process;systemic acquired resistance, salicylic acid mediated signaling pathway;regulation of hydrogen peroxide metabolic process;negative regulation of defense response;defense response to bacterium;regulation of innate immune response;defense response to fungus	nucleus	kinase activity
131	AT3G18820	AT1G49300	RABG3F	5.11	AT-CX:1.00	2/35	CdZIK1 CdRAF15/CdRAF25	protein folding;Golgi organization;vacuole organization;response to heat;response to high light intensity;vesicle-mediated transport;response to endoplasmic reticulum stress;response to hydrogen peroxide;root hair elongation	nucleus;Golgi apparatus;plasma membrane	GTP binding
132	AT3G45670	no_paralog	na	5.1	AT-PG:1.00	2/35	CdZIK3 CdZIK4	na	nucleus	kinase activity
133	AT2G26990	no_paralog	FUS12	5.09	HS-LC:1.00	2/35	CdRAF13 CdRAF15/CdRAF25	photomorphogenesis;cullin deneddylation;protein catabolic process	nucleus;cytosol;COP9 signalosome	protein binding
134	AT1G64480	no_paralog	CBL8	5.07	HS-LC:1.00	2/35	CdRAF13 CdRAF15/CdRAF25	calcium-mediated signaling	plasma membrane;membrane	calcium ion binding
135	AT4G17615	AT5G47100	SCABP5	5.03	HS-LC:1.00	2/35	CdRAF13 CdRAF15/CdRAF25	MAPK cascade;protein targeting to membrane;response to osmotic stress;cell communication;signal transduction;response to cold;response to water deprivation;response to wounding;response to salt stress;response to ethylene;response to auxin;abscisic acid-activated signaling pathway;response to jasmonic acid;systemic acquired resistance, salicylic acid mediated signaling pathway;salicylic acid medi…	cytoplasm;plasma membrane	calcium ion binding;protein binding;kinase binding
136	AT5G67280	AT2G23300 AT4G37250	RLK	5.01	AT-PG:1.00	2/35	CdZIK1 CdZIK4	protein phosphorylation;transmembrane receptor protein tyrosine kinase signaling pathway	extracellular region	protein serine/threonine kinase activity;ATP binding;kinase activity
137	AT3G27280	AT5G40770	PHB4	5	HS-LC:1.00	2/35	CdRAF13 CdRAF15/CdRAF25	RNA methylation	mitochondrion;mitochondrial respiratory chain complex I;vacuole;vacuolar membrane;plasma membrane;plant-type cell wall;chloroplast	na
138	AT5G47100	AT4G17615	CBL9	5	HS-LC:1.00	2/35	CdRAF13 CdRAF15/CdRAF25	response to water deprivation;potassium ion import;stomatal movement;calcium-mediated signaling	cytoplasm;plasma membrane;protein serine/threonine phosphatase complex	calcium ion binding;protein binding
139	AT4G33650	AT2G14120	NOXY15	5	HS-LC:1.00	2/35	CdRAF13 CdRAF15/CdRAF25	mitochondrial fission;protein targeting to mitochondrion;photomorphogenesis;chloroplast organization;post-embryonic development;embryo development ending in seed dormancy;seed germination;regulation of flower development;meristem structural organization;seed dormancy process;sugar mediated signaling pathway;vegetative to reproductive phase transition of meristem;peroxisome fission;protein ubiquit…	mitochondrion;peroxisome;cytosol;chloroplast;chloroplast envelope;membrane	GTPase activity;protein binding;GTP binding;phosphatidylinositol binding;identical protein binding
140	AT1G30640	no_paralog	na	5	AT-PG:0.57 HS-LC:0.43	2/35	CdZIK4 CdMEKK9/CdMEKK10	na	cytoplasm	protein kinase activity;kinase activity
141	AT4G26570	AT5G55990	CBL3	4.92	HS-LC:1.00	2/35	CdRAF13 CdRAF15/CdRAF25	detection of calcium ion;stomatal movement;calcium-mediated signaling;potassium ion homeostasis	vacuole;vacuolar membrane;plasma membrane;plant-type vacuole membrane;membrane	calcium ion binding;protein binding
142	AT3G08530	no_paralog	CHC2	4.91	HS-LC:1.00	2/35	CdRAF13 CdRAF15/CdRAF25	endocytosis	Golgi apparatus;cytosol;plasma membrane;plasmodesma;chloroplast;membrane	structural molecule activity;protein binding
143	AT3G59730	no_paralog	na	4.9	AT-PG:1.00	2/35	CdZIK1 CdZIK4	na	plasma membrane	kinase activity;carbohydrate binding
144	AT5G55990	AT4G26570	CBL2	4.9	HS-LC:1.00	2/35	CdRAF13 CdRAF15/CdRAF25	MAPK cascade;regulation of transcription, DNA-templated;protein targeting to membrane;response to bacterium;systemic acquired resistance, salicylic acid mediated signaling pathway;jasmonic acid mediated signaling pathway;stomatal movement;regulation of hydrogen peroxide metabolic process;regulation of plant-type hypersensitive response;calcium-mediated signaling;negative regulation of defense res…	vacuole;plant-type vacuole membrane;membrane;cytosolic ribosome	calcium ion binding;protein binding
145	AT4G33080	no_paralog	na	4.87	AT-PG:0.59 HS-LC:0.41	2/35	CdZIK4 CdMEKK9/CdMEKK10	na	nucleus	kinase activity
146	AT4G33000	no_paralog	SCABP8	4.84	HS-LC:1.00	2/35	CdRAF13 CdRAF15/CdRAF25	polysaccharide biosynthetic process;multidimensional cell growth;cell tip growth;regulation of hormone levels;calcium-mediated signaling;hyperosmotic salinity response;regulation of potassium ion transport;anthocyanin accumulation in tissues in response to UV light;root hair elongation;cell wall organization;regulation of ion homeostasis	cytoplasm;plasma membrane;chloroplast;plant-type vacuole membrane	calcium ion binding;protein binding
147	AT3G11130	no_paralog	CHC1	4.84	HS-LC:1.00	2/35	CdRAF13 CdRAF15/CdRAF25	endocytosis	vacuole;vacuolar membrane;Golgi apparatus;plasma membrane;plasmodesma	structural molecule activity;protein binding
148	AT4G35020	no_paralog	ROP6	4.78	HS-LC:1.00	2/35	CdRAF13 CdRAF15/CdRAF25	microtubule cytoskeleton organization;RNA splicing, via endonucleolytic cleavage and ligation;actin filament organization;methionine biosynthetic process;pollen tube growth	nucleus;nucleolus;cytoplasm;spindle;plasma membrane;site of polarized growth	GTPase activity;GTP binding
149	AT2G19400	no_paralog	na	4.77	AT-PG:0.59 HS-LC:0.41	2/35	CdRAF2/CdRAF4 CdMEKK9/CdMEKK10	na	nucleus	kinase activity
150	AT5G28290	AT3G04810	NEK3	4.76	AT-CC:1.00	1/35	CdRAF37	na	plasma membrane	kinase activity
151	AT2G36350	AT3G52890	na	4.73	AT-PG:1.00	2/35	CdZIK1 CdZIK4	methylation-dependent chromatin silencing;determination of bilateral symmetry;meristem initiation;meristem maintenance;RNA interference	nucleus;plasma membrane	protein binding;kinase activity
152	AT3G45640	no_paralog	MPK3	4.7	HS-LC:1.00	2/35	CdRAF13 CdRAF15/CdRAF25	MAPK cascade;activation of MAPK activity involved in osmosensory signaling pathway;response to hypoxia;regulation of transcription, DNA-templated;protein targeting to membrane;response to osmotic stress;response to oxidative stress;signal transduction;response to cold;detection of biotic stimulus;response to wounding;response to bacterium;salicylic acid biosynthetic process;abscisic acid-activate…	nucleus	protein kinase activity;MAP kinase activity;protein binding;kinase activity
153	AT4G21940	AT4G04710 AT1G61950	CPK15	4.69	AT-PG:0.79 HS-CX:0.21	1/35	CdRAF15/CdRAF25	protein phosphorylation	plasma membrane	calmodulin-dependent protein kinase activity;kinase activity
154	AT3G52890	AT2G36350	KIPK	4.69	AT-PG:1.00	2/35	CdZIK1 CdZIK4	mitotic cell cycle;RNA processing	nucleus;cytoplasm	protein kinase activity;protein binding;kinase activity
155	AT4G04740	no_paralog	CPK23	4.67	AT-PG:0.79 HS-CX:0.21	1/35	CdRAF15/CdRAF25	protein phosphorylation;response to cadmium ion	plasma membrane	protein kinase activity;calmodulin-dependent protein kinase activity;protein binding;kinase activity;protein phosphatase binding
156	AT3G46930	AT5G58950	na	4.64	AT-CC:1.00	1/35	CdRAF2/CdRAF4	response to high light intensity;response to chitin;response to hydrogen peroxide	nucleus	protein serine/threonine/tyrosine kinase activity;kinase activity
157	AT5G40770	AT3G27280 AT5G14300	PHB3	4.6	HS-LC:1.00	2/35	CdRAF13 CdRAF15/CdRAF25	RNA methylation;protein targeting to mitochondrion;mitochondrion organization;response to salt stress;response to ethylene;response to auxin;cell growth;response to endoplasmic reticulum stress;lateral root development;cell division;response to nitric oxide	nucleolus;mitochondrion;mitochondrial respiratory chain complex I;vacuole;vacuolar membrane;plasma membrane;membrane	na
158	AT5G64550	AT5G09670	na	4.57	AT-HT:1.00	1/35	CdRAF10/CdRAF17	na	nucleus	na
159	AT1G49710	AT3G19280	FUT12	4.55	HS-CX:1.00	2/35	CdRAF13 CdRAF15/CdRAF25	na	endosome;Golgi apparatus;trans-Golgi network	fucosyltransferase activity;transferase activity, transferring glycosyl groups
160	AT4G17960	AT5G46620	na	4.54	AT-CX:1.00	2/35	CdRAF13 CdRAF15/CdRAF25	na	cytoplasm	na
161	AT1G43690	no_paralog	na	4.51	AT-DC:1.00	1/35	CdRAF36	na	nucleus;cytosol	na
162	AT1G18760	no_paralog	na	4.51	AT-DC:1.00	1/35	CdRAF36	na	nucleus	zinc ion binding
163	AT1G73440	no_paralog	na	4.5	AT-DC:1.00	1/35	CdRAF36	na	na	na
164	AT2G32850	no_paralog	na	4.5	AT-CC:1.00	1/35	CdRAF10/CdRAF17	protein phosphorylation	nucleus;cytoplasm	protein kinase activity;ATP binding
165	AT4G00752	no_paralog	na	4.49	AT-DC:1.00	1/35	CdRAF36	na	na	na
166	AT4G11740	AT4G23040	SAY1	4.49	AT-DC:1.00	1/35	CdRAF36	vesicle-mediated transport	nucleus;cytoplasm;cytosol	na
167	AT1G75640	AT4G36180	na	4.48	AT-PG:1.00	2/35	CdZIK2 CdZIK4	protein phosphorylation;transmembrane receptor protein tyrosine kinase signaling pathway	plasma membrane	protein serine/threonine kinase activity;ATP binding;kinase activity
168	AT4G36860	no_paralog	na	4.48	AT-DC:1.00	1/35	CdRAF36	na	plasma membrane	na
169	AT1G19270	no_paralog	DA1	4.48	AT-DC:1.00	1/35	CdRAF36	negative regulation of organ growth;seed morphogenesis;ovule morphogenesis	nucleus	ubiquitin binding
170	AT5G66620	no_paralog	DAR6	4.48	AT-DC:1.00	1/35	CdRAF36	na	cytoplasm	na
171	AT4G31840	AT2G25060	ENODL15	4.48	AT-CX:1.00	1/35	CdMEKK13	microtubule cytoskeleton organization;cytokinesis by cell plate formation;acetyl-CoA metabolic process;regulation of meristem growth;spindle assembly	plasma membrane;anchored component of membrane	copper ion binding
172	AT4G01420	no_paralog	CBL5	4.47	HS-LC:1.00	2/35	CdRAF13 CdRAF15/CdRAF25	response to osmotic stress;response to water deprivation;response to salt stress;stomatal movement;calcium-mediated signaling	plasma membrane	calcium ion binding
173	AT4G16350	no_paralog	SCABP2	4.47	HS-LC:1.00	2/35	CdRAF13 CdRAF15/CdRAF25	calcium-mediated signaling	na	calcium ion binding
174	AT3G48690	no_paralog	CXE12	4.47	AT-HT:1.00	1/35	CdMEKK13	na	nucleus;cytoplasm;cytosol	na
175	AT4G11860	AT4G22960	na	4.45	AT-DC:1.00	1/35	CdRAF36	na	nucleus;cytoplasm;cytosol;plasma membrane	na
176	AT2G17800	AT3G51300	ROP3	4.45	HS-LC:1.00	2/35	CdRAF13 CdRAF15/CdRAF25	actin filament organization;auxin-activated signaling pathway;abscisic acid-activated signaling pathway	nucleus;cytoplasm;spindle;plasma membrane;phragmoplast	GTP binding
177	AT4G38630	no_paralog	RPN10	4.45	AT-DC:1.00	1/35	CdRAF36	gluconeogenesis;glycolytic process;ubiquitin-dependent protein catabolic process;protein targeting to vacuole;fatty acid beta-oxidation;water transport;hyperosmotic response;cellular response to DNA damage stimulus;cytoskeleton organization;Golgi organization;response to temperature stimulus;toxin catabolic process;response to heat;pollen development;response to salt stress;response to auxin;resp…	proteasome complex;nucleus;cytoplasm;cytosol;proteasome regulatory particle, base subcomplex;membrane	peptide receptor activity
178	AT1G75840	AT1G20090	ROP4	4.43	HS-LC:1.00	2/35	CdRAF13 CdRAF15/CdRAF25	polysaccharide biosynthetic process;actin filament organization;multidimensional cell growth;cell tip growth;regulation of hormone levels;anthocyanin accumulation in tissues in response to UV light;root hair elongation;cell wall organization	nucleus;nucleolus;cytoplasm;plasma membrane;phragmoplast	GTPase activity;protein binding;GTP binding;protein kinase binding
179	AT4G35950	AT3G51300	ROP5	4.42	HS-LC:1.00	2/35	CdRAF13 CdRAF15/CdRAF25	actin filament organization	nucleus;cytoplasm	GTP binding
180	AT3G51300	AT4G35950 AT2G17800	ROP1AT	4.42	HS-LC:1.00	2/35	CdRAF13 CdRAF15/CdRAF25	actin filament organization;plant-type cell wall modification;pollen tube growth;regulation of exocytosis;actin cytoskeleton organization;actin filament-based movement;regulation of actin filament polymerization;regulation of actin filament depolymerization;establishment of vesicle localization	nucleus;nucleolus;cytoplasm;spindle;plasma membrane;phragmoplast;apical part of cell	GTPase activity;protein binding;GTP binding;GTPase activating protein binding
181	AT5G17760	no_paralog	na	4.42	AT-CC:1.00	1/35	CdMEKK11/CdMEKK12	systemic acquired resistance;salicylic acid biosynthetic process	plasma membrane	ATP binding
182	AT4G33920	no_paralog	APD5	4.42	AT-CC:1.00	1/35	CdMEKK11/CdMEKK12	protein targeting to membrane;response to chitin;regulation of plant-type hypersensitive response;endoplasmic reticulum unfolded protein response;negative regulation of programmed cell death;defense response by callose deposition	na	protein serine/threonine phosphatase activity
183	AT2G04880	no_paralog	ZAP1	4.4	AT-CX:1.00	2/35	CdMEKK3/CdMEKK5 CdRAF9	regulation of transcription, DNA-templated;salicylic acid mediated signaling pathway;positive regulation of transcription, DNA-templated	nucleus	sequence-specific DNA binding transcription factor activity;zinc ion binding
184	AT1G55860	no_paralog	UPL1	4.4	AT-DC:1.00	1/35	CdRAF36	ubiquitin-dependent protein catabolic process;protein ubiquitination;protein ubiquitination involved in ubiquitin-dependent protein catabolic process	ubiquitin ligase complex;nucleus;mitochondrion;cytosol;plasmodesma;membrane	ubiquitin-protein ligase activity
185	AT1G70320	no_paralog	UPL2	4.4	AT-DC:1.00	1/35	CdRAF36	ubiquitin-dependent protein catabolic process;protein ubiquitination;protein ubiquitination involved in ubiquitin-dependent protein catabolic process	ubiquitin ligase complex;nucleus;mitochondrion;cytosol	ubiquitin-protein ligase activity
186	AT1G78070	no_paralog	na	4.39	AT-HT:1.00	1/35	CdRAF19	na	cytoplasm;Cul4-RING ubiquitin ligase complex	na
187	AT1G14570	no_paralog	PUX7	4.39	AT-DC:1.00	1/35	CdRAF36	na	nucleus;cytoplasm	protein binding, bridging
188	AT1G54960	no_paralog	NP2	4.38	AT-CC:1.00	1/35	CdMEKK13	cytokinesis;cortical microtubule organization	na	MAP kinase kinase kinase activity;kinase activity
189	AT2G42880	no_paralog	MPK20	4.38	AT-CC:1.00	1/35	CdMEKK13	signal transduction;plant-type cell wall organization;plant-type cell wall biogenesis;regulation of meristem growth	nucleus	MAP kinase activity;protein binding
190	AT3G50310	AT5G67080	MKKK20	4.38	AT-CC:1.00	1/35	CdMEKK13	response to reactive oxygen species;protein phosphorylation;response to cold;response to water deprivation;response to salt stress;pollen sperm cell differentiation	na	protein binding;kinase activity
191	AT3G11900	no_paralog	ANT1	4.38	AT-CC:1.00	1/35	CdRAF13	amino acid transport;response to nematode	membrane	amino acid transmembrane transporter activity;aromatic amino acid transmembrane transporter activity;neutral amino acid transmembrane transporter activity
192	AT2G41140	AT3G56760	CRK1	4.38	AT-PG:1.00	1/35	CdRAF12	heat acclimation;protein autophosphorylation	plasma membrane	calmodulin-dependent protein kinase activity;calcium-dependent protein serine/threonine phosphatase activity;calcium ion binding;protein binding;calmodulin binding;kinase activity
193	AT4G34150	no_paralog	na	4.36	AT-CC:1.00	1/35	CdMEKK11/CdMEKK12	protein targeting to membrane;response to cold;response to wounding;response to mechanical stimulus;response to absence of light;response to chitin;regulation of plant-type hypersensitive response;endoplasmic reticulum unfolded protein response;negative regulation of programmed cell death;defense response by callose deposition	cytosol;plasmodesma	na
194	AT2G30040	AT1G07150	MAPKKK14	4.36	AT-CC:1.00	1/35	CdMEKK11/CdMEKK12	chloroplast organization;response to abscisic acid;abscisic acid-activated signaling pathway;response to jasmonic acid;ethylene-activated signaling pathway;response to chitin;intracellular signal transduction;positive regulation of transcription, DNA-templated;protein autophosphorylation	nucleus	protein serine/threonine kinase activity;kinase activity
195	AT3G13530	no_paralog	MAPKKK7	4.36	AT-CC:1.00	1/35	CdRAF16/CdRAF30/CdRAF33	plasma membrane organization;pollen development	cytosol;plasma membrane	kinase activity
196	AT1G20090	AT1G75840	ROP2	4.35	HS-LC:1.00	2/35	CdRAF13 CdRAF15/CdRAF25	microtubule cytoskeleton organization;polysaccharide biosynthetic process;cell morphogenesis;actin filament organization;response to light stimulus;multidimensional cell growth;pollen tube growth;cell tip growth;regulation of stomatal movement;regulation of hormone levels;anthocyanin accumulation in tissues in response to UV light;root hair elongation;cell wall organization	nucleus;nucleolus;cytoplasm;plasma membrane	GTP binding
197	AT3G56760	AT2G41140	na	4.34	AT-PG:1.00	1/35	CdRAF12	na	plasma membrane;membrane	calcium-dependent protein serine/threonine phosphatase activity;calcium ion binding;kinase activity
198	AT1G48590	AT3G17980	na	4.33	HS-LC:1.00	2/35	CdRAF8 CdMEKK9/CdMEKK10	na	chloroplast	na
199	AT5G60100	no_paralog	PRR3	4.31	AT-LC:1.00	1/35	CdZIK1	chromatin assembly or disassembly;regulation of transcription, DNA-templated;circadian rhythm;negative regulation of protein binding;regulation of circadian rhythm	nucleus	phosphorelay response regulator activity;protein binding
200	AT1G09070	no_paralog	SRC2	4.3	AT-CC:1.00	1/35	CdMEKK11/CdMEKK12	protein targeting to membrane;protein targeting to vacuole;anion transport;nucleotide transport;ER to Golgi vesicle-mediated transport;response to wounding;response to mechanical stimulus;response to absence of light;response to chitin;regulation of plant-type hypersensitive response;ammonium transport;basic amino acid transport;negative regulation of programmed cell death;amino acid import;regul…	protein storage vacuole;endoplasmic reticulum;plasma membrane	protein binding
201	AT1G73500	AT1G18350	MKK9	4.3	AT-CC:1.00	1/35	CdMEKK11/CdMEKK12	tryptophan catabolic process;response to wounding;response to salt stress;indoleacetic acid biosynthetic process;ethylene biosynthetic process;ethylene-activated signaling pathway;camalexin biosynthetic process;response to chitin;cysteine biosynthetic process;positive regulation of transcription, DNA-templated;protein autophosphorylation	mitochondrion	protein serine/threonine kinase activity;MAP kinase kinase activity;protein binding;kinase activity;protein kinase activator activity
202	AT5G67400	AT3G49960	RHS19	4.3	AT-CC:1.00	1/35	CdMEKK11/CdMEKK12	trichoblast differentiation	extracellular region	peroxidase activity
203	AT4G18710	no_paralog	UCU1	4.3	AT-LC:1.00	1/35	CdMEKK1/CdMEKK2	glycolytic process;protein phosphorylation;water transport;hyperosmotic response;Golgi organization;response to temperature stimulus;response to salt stress;detection of brassinosteroid stimulus;response to auxin;brassinosteroid mediated signaling pathway;multidimensional cell growth;leaf morphogenesis;response to cadmium ion;protein autophosphorylation;positive regulation of protein export from …	plasma membrane	protein kinase activity;protein serine/threonine kinase activity;protein binding;kinase activity
204	AT1G61950	AT4G04710 AT4G21940	CPK19	4.27	AT-PG:1.00	1/35	CdRAF12	protein phosphorylation	plasma membrane	calmodulin-dependent protein kinase activity;kinase activity
205	AT4G04720	no_paralog	CPK21	4.27	AT-PG:1.00	1/35	CdRAF12	protein phosphorylation	nucleus;plasma membrane;plasmodesma	protein kinase activity;calmodulin-dependent protein kinase activity;protein binding;kinase activity;protein phosphatase binding
206	AT3G23150	no_paralog	ETR2	4.26	AT-LC:1.00	1/35	CdRAF29/CdRAF35	nucleotide biosynthetic process;negative regulation of ethylene-activated signaling pathway	endoplasmic reticulum	protein histidine kinase activity;protein serine/threonine kinase activity;receptor activity;protein binding;ethylene binding
207	AT4G39800	AT2G22240	MIPS1	4.26	AT-CC:1.00	1/35	CdRAF15/CdRAF25	inositol biosynthetic process;phosphatidylserine biosynthetic process;phospholipid biosynthetic process;post-embryonic development;embryo development ending in seed dormancy;myo-inositol hexakisphosphate biosynthetic process;glucosinolate biosynthetic process	cytoplasm	inositol-3-phosphate synthase activity;protein binding
208	AT2G31980	no_paralog	CYS2	4.26	AT-CC:1.00	1/35	CdMEKK11/CdMEKK12	fatty acid catabolic process;seed dormancy process	extracellular region	na
209	AT5G62020	no_paralog	HSFB2A	4.26	AT-CC:1.00	1/35	CdMEKK11/CdMEKK12	respiratory burst involved in defense response;response to chitin;intracellular signal transduction	nucleus	DNA binding;sequence-specific DNA binding transcription factor activity
210	AT5G23580	no_paralog	CPK12	4.25	AT-PG:1.00	1/35	CdRAF12	protein phosphorylation;abscisic acid-activated signaling pathway	na	calmodulin-dependent protein kinase activity;kinase activity
211	AT4G26070	no_paralog	NMAPKK	4.22	AT-LC:1.00	1/35	CdMEKK4/CdMEKK6	maltose metabolic process;MAPK cascade;response to molecule of bacterial origin;respiratory burst involved in defense response;regulation of transcription, DNA-templated;protein targeting to membrane;cellular response to nitrogen starvation;response to cold;response to water deprivation;detection of biotic stimulus;response to wounding;response to bacterium;response to insect;systemic acquired re…	chloroplast	MAP kinase kinase activity;protein binding;kinase activity
212	AT2G47430	no_paralog	CKI1	4.22	AT-LC:1.00	1/35	CdRAF29/CdRAF35	embryo sac development;cytokinin-activated signaling pathway;phloem or xylem histogenesis;secondary growth	plasma membrane;plasmodesma;membrane	phosphorelay response regulator activity;protein histidine kinase activity;protein binding;protein homodimerization activity
213	AT5G24470	no_paralog	PRR5	4.22	AT-LC:1.00	1/35	CdZIK1	starch metabolic process;regulation of transcription, DNA-templated;circadian rhythm;response to red or far red light;photomorphogenesis;response to red light;response to far red light;regulation of circadian rhythm;negative regulation of transcription, DNA-templated;long-day photoperiodism, flowering;nuclear import	nucleus	phosphorelay response regulator activity;DNA binding
214	AT4G17190	AT5G47770	FPS2	4.21	AT-CC:1.00	1/35	CdRAF10/CdRAF17	acetyl-CoA metabolic process;sterol biosynthetic process;brassinosteroid biosynthetic process;farnesyl diphosphate biosynthetic process	cytoplasm;cytosol	dimethylallyltranstransferase activity;geranyltranstransferase activity
215	AT4G26560	no_paralog	CBL7	4.19	HS-LC:1.00	2/35	CdRAF13 CdRAF15/CdRAF25	detection of calcium ion;calcium-mediated signaling	na	calcium ion binding
216	AT5G37740	AT1G66360	na	4.18	HS-LC:1.00	2/35	CdRAF8 CdMEKK9/CdMEKK10	na	na	na
217	AT5G62520	AT3G47720	SRO5	4.16	AT-CC:1.00	1/35	CdMEKK11/CdMEKK12	response to salt stress;response to chitin;reactive oxygen species metabolic process	nucleus;mitochondrion	na
218	AT4G27280	AT5G54490	na	4.16	AT-CC:1.00	1/35	CdMEKK11/CdMEKK12	response to wounding;response to mechanical stimulus;response to chitin;response to karrikin	plasma membrane	calcium ion binding
219	AT1G76650	no_paralog	CML38	4.16	AT-CC:1.00	1/35	CdMEKK11/CdMEKK12	response to wounding;response to fungus;jasmonic acid biosynthetic process;response to ethylene;abscisic acid-activated signaling pathway;response to jasmonic acid;ethylene-activated signaling pathway;response to chitin;intracellular signal transduction	nucleus;plasma membrane	calcium ion binding
220	AT5G24430	AT3G49370	na	4.13	AT-PG:1.00	1/35	CdRAF12	amino acid transport;protein autophosphorylation	plasma membrane;plasmodesma	protein serine/threonine kinase activity;calcium-dependent protein serine/threonine phosphatase activity;calcium ion binding;kinase activity
221	AT3G06120	no_paralog	MUTE	4.13	AT-CC:1.00	1/35	CdMEKK1/CdMEKK2	stomatal complex development	nucleus	DNA binding;sequence-specific DNA binding transcription factor activity
222	AT1G66360	AT5G37740	na	4.13	HS-LC:1.00	2/35	CdRAF8 CdMEKK9/CdMEKK10	na	na	na
223	AT4G23810	AT4G11070	WRKY53	4.12	AT-LC:1.00	1/35	CdMEKK4/CdMEKK6	MAPK cascade;regulation of transcription, DNA-templated;protein targeting to membrane;detection of biotic stimulus;salicylic acid biosynthetic process;response to salicylic acid;defense response to bacterium, incompatible interaction;systemic acquired resistance, salicylic acid mediated signaling pathway;jasmonic acid mediated signaling pathway;leaf senescence;response to ozone;response to chitin…	nucleus;chloroplast	DNA binding;sequence-specific DNA binding transcription factor activity;protein binding
224	AT1G70810	no_paralog	na	4.1	HS-LC:1.00	2/35	CdRAF8 CdMEKK9/CdMEKK10	na	na	na
225	AT3G27580	no_paralog	D6PKL3	4.09	AT-PG:1.00	2/35	CdZIK2 CdRAF6/CdRAF23	na	na	protein serine/threonine kinase activity;kinase activity
226	AT5G45970	no_paralog	ROP7	4.09	HS-LC:1.00	2/35	CdRAF13 CdRAF15/CdRAF25	actin filament organization;plant-type cell wall biogenesis;glucuronoxylan metabolic process;xylan biosynthetic process	plasma membrane	GTP binding
227	AT1G66340	no_paralog	ETR1	4.07	AT-LC:1.00	1/35	CdRAF29/CdRAF35	response to molecule of bacterial origin;defense response;circadian rhythm;response to heat;response to insect;response to salt stress;cytokinin metabolic process;response to ethylene;detection of ethylene stimulus;response to auxin;cytokinin-activated signaling pathway;response to abscisic acid;response to gibberellin;jasmonic acid and ethylene-dependent systemic resistance, ethylene mediated si…	endoplasmic reticulum;endoplasmic reticulum membrane	phosphorelay response regulator activity;protein histidine kinase activity;protein binding;identical protein binding;ethylene binding
228	AT2G18530	no_paralog	na	4.06	AT-PG:1.00	2/35	CdRAF13 CdRAF6/CdRAF23	na	na	kinase activity
229	AT5G53210	no_paralog	SPCH	4.06	AT-CC:1.00	1/35	CdMEKK1/CdMEKK2	regulation of transcription, DNA-templated;stomatal complex morphogenesis;stomatal complex development;regulation of cell proliferation	nucleus	DNA binding;sequence-specific DNA binding transcription factor activity
230	AT3G19280	AT1G49710	FUT11	4.05	HS-CX:1.00	2/35	CdRAF13 CdRAF15/CdRAF25	protein N-linked glycosylation;fucosylation	Golgi apparatus	fucosyltransferase activity;transferase activity, transferring glycosyl groups;4-galactosyl-N-acetylglucosaminide 3-alpha-L-fucosyltransferase activity;alpha-(1->3)-fucosyltransferase activity
231	AT1G12480	no_paralog	SLAC1	4.05	AT-CC:1.00	1/35	CdRAF20/CdRAF27	anion transport;purine nucleobase transport;cellular ion homeostasis;response to humidity;response to abscisic acid;response to carbon dioxide;stomatal movement;response to ozone;multicellular organismal water homeostasis;stomatal closure	plasma membrane;integral component of membrane	transporter activity;voltage-gated anion channel activity;anion transmembrane transporter activity;protein kinase binding
232	AT3G53720	no_paralog	CHX20	4.05	AT-CC:1.00	1/35	CdRAF20/CdRAF27	protein targeting to vacuole;cation transport;regulation of pH;cellular potassium ion homeostasis;water homeostasis;sodium ion transmembrane transport	endoplasmic reticulum;chloroplast;endomembrane system	monovalent cation:hydrogen antiporter activity;sodium:hydrogen antiporter activity
233	AT3G09880	AT5G03470	ATB' BETA	4.03	HS-LC:0.52 AT-CX:0.48	2/35	CdZIK1 CdMEKK9/CdMEKK10	signal transduction	protein phosphatase type 2A complex;nucleus	protein phosphatase type 2A regulator activity
234	AT3G04530	no_paralog	PPCK2	4.01	AT-PG:1.00	1/35	CdRAF15/CdRAF25	protein phosphorylation;cellular response to phosphate starvation;galactolipid biosynthetic process;negative regulation of transcription, DNA-templated	nucleus	protein serine/threonine kinase activity;kinase activity
235	AT1G17500	AT1G72700	na	3.99	AT-CX:1.00	2/35	CdRAF36 CdRAF15/CdRAF25	ER to Golgi vesicle-mediated transport;response to sucrose;response to glucose;response to fructose;amino acid import	plasma membrane	ATPase activity, coupled to transmembrane movement of ions, phosphorylative mechanism
236	AT2G01950	AT1G66150	VH1	3.99	AT-LC:1.00	1/35	CdRAF14	response to molecule of bacterial origin;protein phosphorylation;signal transduction;transmembrane receptor protein tyrosine kinase signaling pathway;auxin-activated signaling pathway;brassinosteroid mediated signaling pathway;xylem and phloem pattern formation;regulation of meristem growth;stomatal complex morphogenesis;phloem transport;leaf vascular tissue pattern formation;stamen development	plasma membrane	protein serine/threonine kinase activity;transmembrane receptor protein serine/threonine kinase activity;protein binding;ATP binding
237	AT1G75780	AT1G20010	TUB1	3.98	HS-LC:1.00	2/35	CdRAF13 CdRAF15/CdRAF25	polysaccharide biosynthetic process;gluconeogenesis;cytoskeleton organization;response to light stimulus;multidimensional cell growth;unidimensional cell growth;cell tip growth;proteasomal protein catabolic process;regulation of hormone levels;anthocyanin accumulation in tissues in response to UV light;root hair elongation;cell wall organization	cytoplasm;vacuole	structural molecule activity
238	AT2G43790	AT3G59790	MPK6	3.98	HS-LC:1.00	2/35	CdRAF13 CdRAF15/CdRAF25	MAPK cascade;response to reactive oxygen species;response to superoxide;protein targeting to membrane;response to osmotic stress;response to oxidative stress;cell communication;signal transduction;response to cold;response to salt stress;response to ethylene;response to auxin;response to abscisic acid;abscisic acid-activated signaling pathway;response to carbohydrate;response to salicylic acid;sy…	nucleus;trans-Golgi network;phragmoplast;preprophase band	protein kinase activity;MAP kinase activity;protein binding;kinase activity
239	AT5G62880	AT3G48040	ROP11	3.98	HS-LC:1.00	2/35	CdRAF13 CdRAF15/CdRAF25	actin filament organization;plant-type cell wall organization;negative regulation of abscisic acid-activated signaling pathway	extracellular region;nucleus;plasma membrane;secondary cell wall	GTP binding;protein kinase binding;protein phosphatase binding
240	AT1G67520	no_paralog	na	3.97	AT-PG:1.00	2/35	CdZIK1 CdZIK4	na	plasma membrane	kinase activity;carbohydrate binding
241	AT2G34500	no_paralog	CYP710A1	3.96	AT-CC:1.00	1/35	CdRAF13	toxin catabolic process;response to cyclopentenone;cellular response to phosphate starvation;sterol biosynthetic process;galactolipid biosynthetic process;pentacyclic triterpenoid biosynthetic process;cellular response to water deprivation	extracellular region	C-22 sterol desaturase activity;oxygen binding
242	AT3G08680	no_paralog	na	3.94	AT-PG:1.00	2/35	CdZIK2 CdZIK4	acetyl-CoA metabolic process;protein phosphorylation;microtubule nucleation;transmembrane receptor protein tyrosine kinase signaling pathway;pattern specification process;regulation of cell size;plant-type cell wall organization;auxin polar transport;root morphogenesis;regulation of meristem growth;sterol biosynthetic process;brassinosteroid biosynthetic process;growth;cell wall modification	extracellular region;plasma membrane;plant-type cell wall;plasmodesma	protein serine/threonine kinase activity;ATP binding;kinase activity
243	AT3G57530	AT2G41860	CPK32	3.92	AT-PG:1.00	1/35	CdRAF36	MAPK cascade;protein phosphorylation;protein targeting to membrane;cell communication;signal transduction;response to cold;response to water deprivation;response to wounding;response to salt stress;response to ethylene;response to auxin;response to abscisic acid;abscisic acid-activated signaling pathway;response to jasmonic acid;systemic acquired resistance, salicylic acid mediated signaling path…	nucleus;cytoplasm;plasma membrane;plasmodesma	calmodulin-dependent protein kinase activity;calcium-dependent protein kinase C activity;protein binding;kinase activity
244	AT1G23140	AT1G70790	na	3.92	HS-LC:1.00	2/35	CdRAF8 CdMEKK9/CdMEKK10	na	nucleus;plasma membrane;apoplast	na
245	AT1G20010	AT1G75780	TUB5	3.91	HS-LC:1.00	2/35	CdRAF13 CdRAF15/CdRAF25	gluconeogenesis;cytoskeleton organization;microtubule-based process;proteasomal protein catabolic process	cell wall;cytoplasm;vacuolar membrane;plasma membrane;chloroplast;chloroplast stroma;membrane;tubulin complex	structural constituent of cytoskeleton
246	AT3G49060	no_paralog	na	3.9	AT-PG:1.00	2/35	CdMEKK8 CdZIK1	na	nucleus;plasma membrane	kinase activity
247	AT3G16980	no_paralog	NRPE9A	3.88	AT-HT:1.00	1/35	CdRAF10/CdRAF17	transcription, DNA-templated	DNA-directed RNA polymerase V complex;nucleus;DNA-directed RNA polymerase II, core complex	DNA binding;DNA-directed RNA polymerase activity
248	AT3G48040	AT5G62880	ROP10	3.88	HS-LC:1.00	2/35	CdRAF13 CdRAF15/CdRAF25	actin filament organization;abscisic acid-activated signaling pathway;gibberellic acid mediated signaling pathway;negative regulation of abscisic acid-activated signaling pathway;seed dormancy process	plasma membrane	GTPase activity;GTP binding
249	AT4G39330	AT2G21730	CAD9	3.88	AT-CC:1.00	1/35	CdRAF10/CdRAF17	lignin biosynthetic process	cytoplasm;apoplast	cinnamyl-alcohol dehydrogenase activity
250	AT1G10210	AT1G59580	MPK1	3.87	AT-CC:1.00	1/35	CdMEKK13	MAPK cascade;response to superoxide;regulation of transcription, DNA-templated;protein targeting to membrane;fatty acid beta-oxidation;response to osmotic stress;signal transduction;cell death;response to cold;response to bacterium;response to salt stress;response to auxin;auxin-activated signaling pathway;response to abscisic acid;response to carbohydrate;response to salicylic acid;hormone-media…	nucleus	MAP kinase activity;kinase activity
251	AT1G08650	no_paralog	PPCK1	3.82	AT-PG:1.00	1/35	CdRAF15/CdRAF25	na	nucleus	protein serine/threonine kinase activity;kinase activity
252	AT1G35670	AT4G09570	CPK11	3.8	AT-CC:1.00	1/35	CdRAF16/CdRAF30/CdRAF33	protein phosphorylation;positive regulation of abscisic acid-activated signaling pathway;protein autophosphorylation;regulation of pollen tube growth;regulation of inward rectifier potassium channel activity	nucleus;cytosol;plasma membrane	protein kinase activity;protein serine/threonine kinase activity;calmodulin-dependent protein kinase activity;protein binding;kinase activity
253	AT5G13160	no_paralog	PBS1	3.78	AT-CC:1.00	1/35	CdRAF5	defense response;defense response to bacterium, incompatible interaction;defense response to bacterium;protein autophosphorylation	plasma membrane	protein kinase activity;protein serine/threonine kinase activity;protein binding;kinase activity
254	AT5G64930	no_paralog	HYS1	3.78	AT-CC:1.00	1/35	CdRAF5	defense response;plant-type hypersensitive response;systemic acquired resistance;response to high light intensity;jasmonic acid and ethylene-dependent systemic resistance, jasmonic acid mediated signaling pathway;trichome morphogenesis;leaf senescence;sugar mediated signaling pathway;response to hydrogen peroxide;photoperiodism, flowering;response to other organism	nucleus;chloroplast;membrane	na
255	AT4G28950	no_paralog	ROP9	3.77	HS-LC:1.00	2/35	CdRAF13 CdRAF15/CdRAF25	actin filament organization	extracellular region;plasma membrane	GTP binding
256	AT2G43690	AT3G59700	na	3.77	AT-PG:1.00	1/35	CdZIK4	na	plasma membrane	kinase activity
257	AT4G20890	AT5G44340	TUB9	3.76	HS-LC:1.00	2/35	CdRAF13 CdRAF15/CdRAF25	gluconeogenesis;cytoskeleton organization;proteasomal protein catabolic process;response to cadmium ion	cytoplasm;vacuolar membrane;Golgi apparatus;plasma membrane;plasmodesma;chloroplast;tubulin complex	structural molecule activity
258	AT2G44690	no_paralog	ROP8	3.72	HS-LC:1.00	2/35	CdRAF13 CdRAF15/CdRAF25	actin filament organization;trichome morphogenesis;actin nucleation	plasma membrane	GTP binding
259	AT3G23890	no_paralog	TOPII	3.7	AT-CX:1.00	1/35	CdMEKK13	microtubule cytoskeleton organization;resolution of meiotic recombination intermediates;sister chromatid segregation;cytokinesis by cell plate formation;ATP catabolic process;DNA metabolic process;DNA replication;DNA-dependent DNA replication;DNA topological change;DNA replication initiation;regulation of DNA replication;DNA methylation;mitotic recombination;chromatin silencing;chromosome segrega…	synaptonemal complex;nucleus;DNA topoisomerase complex (ATP-hydrolyzing);chloroplast	DNA binding;DNA topoisomerase activity;DNA topoisomerase type II (ATP-hydrolyzing) activity;ATP binding;DNA-dependent ATPase activity
260	AT5G44340	AT4G20890	TUB4	3.7	HS-LC:1.00	2/35	CdRAF13 CdRAF15/CdRAF25	gluconeogenesis;cytoskeleton organization;proteasomal protein catabolic process	cell wall;cytoplasm;Golgi apparatus;cytosol;plasma membrane;plasmodesma;chloroplast stroma;tubulin complex;apoplast	structural constituent of cytoskeleton
261	AT4G23800	AT4G11080	3xHMG-box2	3.68	AT-CX:1.00	1/35	CdMEKK13	microtubule cytoskeleton organization;cytokinesis by cell plate formation;acetyl-CoA metabolic process;cell proliferation;response to cyclopentenone;histone phosphorylation;regulation of cell proliferation	nucleus	DNA binding;sequence-specific DNA binding transcription factor activity
262	AT1G68140	no_paralog	na	3.66	AT-CX:1.00	1/35	CdZIK1	na	mitochondrion	na
263	AT4G37530	no_paralog	na	3.66	AT-CC:1.00	1/35	CdMEKK4/CdMEKK6	response to salt stress	extracellular region	peroxidase activity;protein binding
264	AT1G25350	no_paralog	OVA9	3.66	AT-CX:1.00	1/35	CdRAF29/CdRAF35	translation;glutamyl-tRNA aminoacylation;photomorphogenesis;embryo development ending in seed dormancy;seed germination;regulation of flower development;meristem structural organization;seed dormancy process;sugar mediated signaling pathway;vegetative to reproductive phase transition of meristem;protein ubiquitination;lipid storage;ovule development;response to freezing	cytoplasm;cytosol	glutamine-tRNA ligase activity
265	AT4G23650	no_paralog	CPK3	3.64	AT-PG:1.00	1/35	CdRAF15/CdRAF25	protein phosphorylation;response to osmotic stress;response to salt stress;abscisic acid-activated signaling pathway;regulation of stomatal movement;regulation of anion channel activity;regulation of protein localization;response to cadmium ion;protein autophosphorylation;regulation of transport	vacuole;cytosol;plasma membrane;chloroplast;membrane	protein kinase activity;protein serine/threonine kinase activity;calmodulin-dependent protein kinase activity;protein binding;kinase activity
266	AT3G50530	no_paralog	CRK	3.61	AT-PG:1.00	1/35	CdRAF12	vegetative to reproductive phase transition of meristem;protein desumoylation;hydrogen peroxide biosynthetic process	plasma membrane	calcium-dependent protein serine/threonine phosphatase activity;calcium ion binding;kinase activity
267	AT3G59790	AT2G43790	MPK10	3.61	HS-LC:1.00	2/35	CdRAF13 CdRAF15/CdRAF25	signal transduction	nucleus	MAP kinase activity;protein binding;kinase activity
268	AT1G50700	AT3G20410	CPK33	3.6	AT-PG:1.00	1/35	CdRAF15/CdRAF25	protein phosphorylation	plasma membrane	calmodulin-dependent protein kinase activity;kinase activity
269	AT1G18840	AT1G74690	IQD30	3.6	AT-CX:1.00	1/35	CdRAF19	na	vacuole	calmodulin binding
270	AT3G07940	no_paralog	na	3.6	HS-LC:1.00	2/35	CdRAF8 CdMEKK9/CdMEKK10	na	nucleus	na
271	AT3G25100	no_paralog	CDC45	3.6	AT-CX:1.00	1/35	CdRAF19	DNA replication;DNA-dependent DNA replication;premeiotic DNA replication;DNA methylation;cell proliferation;gametophyte development;histone H3-K9 methylation	na	na
272	AT3G23920	no_paralog	TR-BAMY	3.6	AT-CX:1.00	1/35	CdRAF3	starch catabolic process;response to water deprivation	nucleus;cytosol;chloroplast	beta-amylase activity
273	AT1G10780	no_paralog	na	3.59	AT-CX:1.00	1/35	CdMEKK13	DNA replication initiation;regulation of DNA replication;cell proliferation;regulation of G2/M transition of mitotic cell cycle;histone phosphorylation;regulation of cell cycle	nucleus;plasmodesma	na
274	AT1G78630	no_paralog	emb1473	3.57	AT-CX:1.00	1/35	CdMEKK13	translation;embryo development ending in seed dormancy;protein targeting to chloroplast	ribosome;chloroplast;chloroplast stroma;thylakoid;chloroplast envelope	structural constituent of ribosome
275	AT5G26751	AT3G05840	SK 11	3.56	AT-PG:1.00	1/35	CdRAF12	meristem structural organization;phosphorylation;hyperosmotic salinity response	nucleus;cytosol	protein kinase activity;protein serine/threonine kinase activity
276	AT5G01090	no_paralog	na	3.56	AT-CX:1.00	1/35	CdRAF15/CdRAF25	polysaccharide biosynthetic process;pattern specification process;regulation of cell size;multidimensional cell growth;auxin polar transport;cell tip growth;root morphogenesis;regulation of hormone levels;cysteine biosynthetic process;growth;anthocyanin accumulation in tissues in response to UV light;root hair elongation;cell wall organization	plasma membrane	carbohydrate binding
277	AT5G59220	AT2G29380	SAG113	3.55	AT-CX:1.00	1/35	CdRAF3	signal transduction;response to cold;response to water deprivation;response to wounding;chloroplast organization;response to ethylene;response to auxin;response to abscisic acid;abscisic acid-activated signaling pathway;response to jasmonic acid;negative regulation of abscisic acid-activated signaling pathway;stomatal movement;leaf senescence;hyperosmotic salinity response	nucleus;Golgi apparatus;cytosol;plasma membrane;cis-Golgi network membrane	protein serine/threonine phosphatase activity
278	AT5G15410	no_paralog	DND1	3.54	AT-CC:1.00	1/35	CdRAF5	defense response;nitric oxide mediated signal transduction;plant-type hypersensitive response	plasma membrane	intracellular cyclic nucleotide activated cation channel activity;intracellular cAMP activated cation channel activity;inward rectifier potassium channel activity;cation channel activity;calcium channel activity;calmodulin binding;cyclic nucleotide binding
279	AT5G51700	no_paralog	RPR2	3.54	AT-CC:1.00	1/35	CdRAF5	respiratory burst involved in defense response;defense response;plant-type hypersensitive response;defense response to bacterium, incompatible interaction;defense response to fungus, incompatible interaction;defense response to bacterium;protein stabilization	nucleus	protein binding;zinc ion binding;Hsp90 protein binding
280	AT5G47710	no_paralog	na	3.54	HS-LC:1.00	2/35	CdRAF8 CdMEKK9/CdMEKK10	na	vacuole;plasma membrane	na
281	AT4G05330	AT4G21160	AGD13	3.53	HS-LC:1.00	2/35	CdRAF8 CdMEKK9/CdMEKK10	pollen development	nucleus	na
282	AT5G61060	no_paralog	HDA5	3.52	HS-LC:1.00	2/35	CdRAF13 CdRAF15/CdRAF25	protein N-linked glycosylation;fatty acid beta-oxidation;protein import into peroxisome matrix;histone deacetylation	nucleus;cytoplasm	histone deacetylase activity
283	AT3G51920	no_paralog	CML9	3.49	AT-LC:1.00	1/35	CdRAF37	detection of calcium ion;response to desiccation;response to cold;response to water deprivation;response to mechanical stimulus;systemic acquired resistance;response to salt stress;response to abscisic acid;calcium-mediated signaling;cellular cation homeostasis;regulation of defense response;divalent metal ion transport	nucleus;cytosol;plasma membrane	calcium ion binding;protein binding
284	AT1G64300	AT5G41730	na	3.49	AT-PG:1.00	1/35	CdRAF15/CdRAF25	endoplasmic reticulum unfolded protein response	na	protein serine/threonine/tyrosine kinase activity;kinase activity
285	AT3G43810	no_paralog	CAM7	3.46	AT-LC:1.00	1/35	CdRAF37	detection of calcium ion;acetyl-CoA metabolic process;response to mechanical stimulus;regulation of photomorphogenesis;calcium-mediated signaling;second-messenger-mediated signaling	cytoplasm	calcium ion binding;protein binding
286	AT1G72770	AT1G17550	HAB1	3.46	AT-CX:1.00	1/35	CdRAF3	response to symbiotic fungus;regulation of seed germination	na	protein serine/threonine phosphatase activity;protein binding
287	AT1G21590	AT1G77280	na	3.45	AT-PG:1.00	1/35	CdMEKK8	response to molecule of fungal origin	nucleus	kinase activity
288	AT1G52690	AT3G15670	LEA7	3.44	AT-CX:1.00	1/35	CdRAF3	embryo development ending in seed dormancy;cell wall modification involved in abscission	na	na
289	AT3G05840	AT5G26751	ATSK12	3.44	AT-PG:1.00	1/35	CdRAF12	meristem structural organization;phosphorylation;protein autophosphorylation	nucleus;cytosol	protein kinase activity;protein serine/threonine kinase activity
290	AT5G21222	no_paralog	na	3.44	AT-PG:1.00	1/35	CdZIK3	na	mitochondrion	protein kinase activity
291	AT2G04350	no_paralog	LACS8	3.42	AT-CX:1.00	1/35	CdRAF3	long-chain fatty acid metabolic process;fatty acid metabolic process;fatty acid biosynthetic process	endoplasmic reticulum;Golgi apparatus;chloroplast;chloroplast envelope	long-chain fatty acid-CoA ligase activity
292	AT1G79150	no_paralog	na	3.42	AT-CX:1.00	1/35	CdMEKK13	mRNA export from nucleus;protein import into nucleus;nucleotide biosynthetic process;pyrimidine ribonucleotide biosynthetic process;embryo sac egg cell differentiation;transcription factor import into nucleus	nucleus	na
293	AT3G49210	no_paralog	na	3.41	AT-CX:1.00	1/35	CdZIK4	amino acid transport;toxin catabolic process;response to nitrate;organ senescence;response to cyclopentenone;nitrate transport	nucleus	na
294	AT5G57050	AT4G26080	AtABI2	3.41	AT-CX:1.00	1/35	CdRAF3	negative regulation of protein kinase activity;protein dephosphorylation;response to osmotic stress;response to heat;response to cold;response to water deprivation;response to abscisic acid;negative regulation of abscisic acid-activated signaling pathway;photoinhibition;hyperosmotic salinity response	protein serine/threonine phosphatase complex	protein serine/threonine phosphatase activity;protein binding
295	AT3G23000	AT4G14580	SnRK3.10	3.4	AT-PG:1.00	1/35	CdZIK3	protein targeting to membrane;water transport;response to cold;response to salt stress;response to fructose;positive regulation of flavonoid biosynthetic process;regulation of plant-type hypersensitive response;cellular cation homeostasis;divalent metal ion transport	plasma membrane	protein binding;kinase activity
296	AT4G01920	no_paralog	na	3.4	AT-HT:1.00	1/35	CdRAF19	na	na	na
297	AT4G14580	AT3G23000	SnRK3.3	3.39	AT-PG:1.00	1/35	CdZIK3	cytokinin biosynthetic process	plasma membrane	kinase activity
298	AT5G11760	no_paralog	na	3.37	AT-CX:1.00	1/35	CdMEKK9/CdMEKK10	na	nucleus	na
299	AT1G51940	no_paralog	LYK3	3.34	AT-PG:1.00	1/35	CdZIK4	microtubule nucleation	plasma membrane	kinase activity
300	AT2G38620	AT3G54180	CDKB1;2	3.34	AT-CX:1.00	1/35	CdMEKK13	regulation of cell cycle	cyclin-dependent protein kinase holoenzyme complex;nucleus	protein serine/threonine kinase activity;protein binding;kinase activity;cyclin binding
301	AT2G41620	AT3G57350	na	3.32	AT-CX:1.00	1/35	CdMEKK13	DNA recombination;mRNA export from nucleus;sister chromatid cohesion;meiotic nuclear division;photomorphogenesis;embryo development ending in seed dormancy;seed germination;regulation of flower development;meristem structural organization;maintenance of meristem identity;seed dormancy process;sugar mediated signaling pathway;vegetative to reproductive phase transition of meristem;response to gamm…	nucleus;nuclear envelope;nucleolus;plasmodesma	protein binding
302	AT4G26080	AT5G57050	AtABI1	3.29	AT-CX:1.00	1/35	CdRAF3	MAPK cascade;response to superoxide;protein dephosphorylation;protein targeting to membrane;autophagy;cell communication;signal transduction;cell death;response to heat;response to cold;response to water deprivation;response to wounding;response to ethylene;response to auxin;response to abscisic acid;abscisic acid-activated signaling pathway;response to jasmonic acid;regulation of abscisic acid-a…	nucleus;protein serine/threonine phosphatase complex	protein serine/threonine phosphatase activity;calcium ion binding;protein binding;protein kinase binding
303	AT1G02970	no_paralog	WEE1	3.29	AT-PG:1.00	1/35	CdRAF15/CdRAF25	DNA replication checkpoint;mitotic cell cycle;nuclear division;double-strand break repair via homologous recombination;cytokinesis by cell plate formation;DNA replication;DNA-dependent DNA replication;DNA replication initiation;regulation of DNA replication;DNA methylation;cell cycle arrest;cell proliferation;pollen development;regulation of G2/M transition of mitotic cell cycle;somatic cell DNA …	nucleus	protein kinase activity;protein binding;kinase activity
304	AT1G16760	AT1G78940	na	3.26	AT-PG:1.00	1/35	CdMEKK8	response to molecule of fungal origin;plant-type cell wall modification;pollen tube growth;actin filament-based movement	nucleus	kinase activity
305	AT3G54120	no_paralog	na	3.25	AT-HT:1.00	1/35	CdRAF19	na	endoplasmic reticulum	na
306	AT3G16030	no_paralog	RFO3	3.25	AT-PG:1.00	1/35	CdZIK4	response to fungus;innate immune response	plasma membrane	kinase activity;carbohydrate binding
307	AT1G72260	no_paralog	THI2.1.1	3.23	AT-CC:1.00	1/35	CdRAF5	defense response;jasmonic acid mediated signaling pathway	extracellular region	toxin receptor binding
308	AT2G19880	no_paralog	na	3.22	AT-CX:1.00	1/35	CdZIK1	na	Golgi apparatus	ceramide glucosyltransferase activity
309	AT4G01010	AT1G01340 AT2G46430	CNGC13	3.2	AT-HT:1.00	1/35	CdRAF9	protein targeting to membrane;ethylene biosynthetic process;salicylic acid biosynthetic process;salicylic acid mediated signaling pathway;response to chitin;regulation of plant-type hypersensitive response;negative regulation of defense response;negative regulation of programmed cell death;innate immune response;defense response to fungus	plasma membrane	ion channel activity;calmodulin binding;cyclic nucleotide binding
310	AT3G45240	AT5G60550	GRIK1	3.18	AT-PG:1.00	1/35	CdZIK4	protein phosphorylation;response to virus;protein autophosphorylation	nucleus	protein serine/threonine kinase activity;protein binding;kinase activity
311	AT2G47770	no_paralog	TSPO	3.18	AT-CX:1.00	1/35	CdRAF3	porphyrin-containing compound metabolic process;response to osmotic stress;response to salt stress;response to abscisic acid	mitochondrion;endoplasmic reticulum;Golgi apparatus;Golgi stack;membrane	heme binding
312	AT2G23200	no_paralog	na	3.17	AT-PG:1.00	1/35	CdZIK4	regulation of unidimensional cell growth	extracellular region	kinase activity
313	AT1G17590	AT1G72830	NF-YA8	3.16	AT-CX:1.00	1/35	CdRAF20/CdRAF27	regulation of transcription, DNA-templated	nucleus;CCAAT-binding factor complex	sequence-specific DNA binding transcription factor activity
314	AT5G22120	no_paralog	na	3.14	HS-CX:1.00	1/35	CdMEKK9/CdMEKK10	na	nucleus	na
315	AT2G48010	no_paralog	RKF3	3.13	AT-PG:1.00	1/35	CdMEKK3/CdMEKK5	na	extracellular region;plasma membrane	receptor signaling protein serine/threonine kinase activity;kinase activity
316	AT1G02730	no_paralog	SOS6	3.12	AT-CX:1.00	1/35	CdMEKK13	microtubule cytoskeleton organization;polysaccharide biosynthetic process;double-strand break repair via homologous recombination;cytokinesis by cell plate formation;response to osmotic stress;response to water deprivation;response to salt stress;plant-type cell wall biogenesis;leaf morphogenesis;response to cyclopentenone;regulation of cell proliferation;cell wall biogenesis;shoot system develop…	Golgi apparatus	glucosyltransferase activity;mannan synthase activity
317	AT2G01820	no_paralog	na	3.11	AT-PG:1.00	1/35	CdZIK1	pollen development;virus induced gene silencing;vegetative phase change	extracellular region;plasma membrane;plant-type cell wall;plasmodesma	na
318	AT1G52310	no_paralog	na	3.08	AT-PG:1.00	1/35	CdMEKK8	methylation-dependent chromatin silencing;cell-cell signaling;virus induced gene silencing;determination of bilateral symmetry;organ morphogenesis;meristem initiation;vernalization response;vegetative phase change;xylem and phloem pattern formation;meristem maintenance;production of ta-siRNAs involved in RNA interference;RNA interference;production of miRNAs involved in gene silencing by miRNA;fl…	plasma membrane	kinase activity
319	AT3G61890	AT2G46680	HB-12	3.06	AT-CX:1.00	1/35	CdRAF3	regulation of transcription, DNA-templated;response to osmotic stress;response to water deprivation;response to virus;response to salt stress;response to abscisic acid;positive regulation of transcription, DNA-templated	nucleus	sequence-specific DNA binding transcription factor activity
320	AT1G25510	no_paralog	na	3.05	AT-CX:1.00	1/35	CdMEKK13	proteolysis	extracellular region	na
321	AT4G30800	no_paralog	na	3.04	AT-CX:1.00	1/35	CdMEKK13	RNA methylation;translation;regulation of flower development;histone lysine methylation	cytoplasm;cytosolic small ribosomal subunit	structural constituent of ribosome
322	AT2G46680	AT3G61890	HB-7	3.03	AT-CX:1.00	1/35	CdRAF3	regulation of transcription, DNA-templated;response to cold;response to water deprivation;response to abscisic acid;abscisic acid-activated signaling pathway;hyperosmotic salinity response;positive regulation of transcription, DNA-templated	nucleus	sequence-specific DNA binding transcription factor activity
323	AT2G43700	no_paralog	na	3.03	AT-PG:1.00	1/35	CdZIK4	na	plasma membrane	kinase activity
324	AT5G60320	no_paralog	na	3.01	AT-PG:1.00	1/35	CdMEKK8	na	plasma membrane;plasmodesma	kinase activity
325	AT3G63250	no_paralog	HMT2	3.01	AT-CX:1.00	1/35	CdMEKK13	RNA splicing, via endonucleolytic cleavage and ligation;DNA replication;DNA methylation;regulation of transcription, DNA-templated;cell proliferation;methionine biosynthetic process;virus induced gene silencing;vegetative phase change;S-methylmethionine cycle;post-translational protein modification;positive regulation of transcription, DNA-templated;histone H3-K9 methylation	cytoplasm	homocysteine S-methyltransferase activity
326	AT1G69260	AT3G29575	AFP1	3	AT-CX:1.00	1/35	CdRAF3	protein targeting to membrane;signal transduction;response to water deprivation;response to wounding;response to ethylene;response to auxin;abscisic acid-activated signaling pathway;response to jasmonic acid;salicylic acid mediated signaling pathway;jasmonic acid mediated signaling pathway;regulation of plant-type hypersensitive response;hyperosmotic salinity response;negative regulation of progr…	nucleus	na
327	AT3G45330	AT5G60300	na	2.99	AT-PG:1.00	1/35	CdMEKK8	na	plasma membrane	kinase activity
328	AT1G07430	AT2G29380	HON	2.98	AT-CX:1.00	1/35	CdRAF3	abscisic acid-activated signaling pathway;negative regulation of abscisic acid-activated signaling pathway;positive regulation of gibberellic acid mediated signaling pathway;positive regulation of seed germination;release of seed from dormancy;negative regulation of seed dormancy process	plasma membrane	protein serine/threonine phosphatase activity
329	AT2G16750	AT4G35030	na	2.98	AT-PG:1.00	1/35	CdMEKK8	na	plasma membrane	kinase activity
330	AT2G41190	no_paralog	na	2.95	AT-CX:1.00	1/35	CdRAF3	amino acid transport	vacuolar membrane;plasma membrane;membrane	amino acid transmembrane transporter activity
331	AT2G36200	no_paralog	na	2.94	AT-CX:1.00	1/35	CdMEKK13	microtubule cytoskeleton organization;cytokinesis by cell plate formation;DNA replication;DNA replication initiation;regulation of DNA replication;DNA methylation;chromatin silencing;mitosis;synapsis;reciprocal meiotic recombination;cell proliferation;regulation of flower development;vegetative to reproductive phase transition of meristem;regulation of cell cycle process;gene silencing;histone ly…	cytoplasm	microtubule motor activity
332	AT3G02480	no_paralog	na	2.94	AT-CX:1.00	1/35	CdRAF3	response to water deprivation;cell wall modification involved in abscission	na	na
333	AT3G11410	no_paralog	PP2CA	2.93	AT-CX:1.00	1/35	CdRAF3	response to cold;response to water deprivation;response to abscisic acid;abscisic acid-activated signaling pathway;negative regulation of abscisic acid-activated signaling pathway;regulation of stomatal movement;hyperosmotic salinity response	nucleus;cytoplasm;cytosol	phosphoprotein phosphatase activity;protein serine/threonine phosphatase activity;protein binding
334	AT4G11890	no_paralog	CRK45	2.93	AT-PG:1.00	1/35	CdZIK4	MAPK cascade;response to molecule of bacterial origin;response to cold;response to water deprivation;detection of external stimulus;detection of biotic stimulus;systemic acquired resistance;response to salt stress;salicylic acid biosynthetic process;response to abscisic acid;systemic acquired resistance, salicylic acid mediated signaling pathway;regulation of hydrogen peroxide metabolic process;n…	na	kinase activity
335	AT5G44560	no_paralog	VPS2.2	2.91	AT-CX:1.00	1/35	CdMEKK13	microtubule cytoskeleton organization;cytokinesis by cell plate formation;DNA replication;DNA methylation;cell proliferation;vesicle-mediated transport;histone phosphorylation;histone H3-K9 methylation	ESCRT III complex;nucleus	protein binding
336	AT5G45700	no_paralog	na	2.9	AT-CX:1.00	1/35	CdMEKK13	cell fate specification	mitochondrion	na
337	AT1G08560	no_paralog	SYP111	2.9	AT-CX:1.00	1/35	CdMEKK13	microtubule cytoskeleton organization;cytokinesis;cytokinesis by cell plate formation;acetyl-CoA metabolic process;intracellular protein transport;cell proliferation;response to cyclopentenone;sterol biosynthetic process;vesicle-mediated transport;spindle assembly	plasma membrane;cell plate;plasmodesma;phragmoplast;endomembrane system	SNAP receptor activity
338	AT5G09590	no_paralog	MTHSC70-2	2.9	HS-LC:1.00	1/35	CdMEKK9/CdMEKK10	protein folding;response to heat;response to virus;response to high light intensity;response to salt stress;methylglyoxal catabolic process to D-lactate;response to endoplasmic reticulum stress;response to hydrogen peroxide;response to cadmium ion	cell wall;mitochondrion;mitochondrial matrix;vacuolar membrane;chloroplast	ATP binding
339	AT4G03100	no_paralog	na	2.89	AT-CX:1.00	1/35	CdMEKK13	microtubule cytoskeleton organization;cytokinesis by cell plate formation;cell proliferation	cytoplasm	Rac GTPase activator activity
340	AT1G20590	no_paralog	na	2.88	AT-CX:1.00	1/35	CdMEKK13	regulation of cell cycle	nucleus	protein binding;cyclin-dependent protein serine/threonine kinase regulator activity
341	AT1G20610	AT1G76310	CYCB2;3	2.88	AT-CX:1.00	1/35	CdMEKK13	regulation of cell cycle	nucleus	protein binding;cyclin-dependent protein serine/threonine kinase regulator activity
342	AT3G54850	no_paralog	PUB14	2.87	AT-HT:1.00	1/35	CdRAF11/CdRAF22/CdRAF34	protein ubiquitination;protein autophosphorylation	na	ubiquitin-protein ligase activity;protein binding;transmembrane receptor protein serine/threonine kinase binding
343	AT3G06670	no_paralog	na	2.87	HS-CX:1.00	1/35	CdMEKK9/CdMEKK10	na	cytoplasm	na
344	AT3G08870	no_paralog	na	2.87	AT-PG:1.00	1/35	CdZIK4	na	plasma membrane	kinase activity
345	AT2G45070	AT3G60540	SEC61 BETA	2.86	AT-HT:1.00	1/35	CdMEKK9/CdMEKK10	protein folding;response to heat;response to high light intensity;protein transport;response to endoplasmic reticulum stress;response to hydrogen peroxide	na	protein transporter activity
346	AT2G36620	AT3G53020	RPL24A	2.85	AT-CX:1.00	1/35	CdMEKK13	RNA methylation;translation;ribosome biogenesis	cytoplasm;cytosol;ribosome;plasma membrane;chloroplast;membrane;cytosolic large ribosomal subunit	structural constituent of ribosome
347	AT5G13290	no_paralog	SOL2	2.84	AT-PG:1.00	1/35	CdMEKK8	mRNA export from nucleus;cell adhesion;determination of bilateral symmetry;post-embryonic morphogenesis;regulation of flower development;polarity specification of adaxial/abaxial axis;leaf morphogenesis;meristem initiation;meristem maintenance;maintenance of meristem identity;regulation of meristem growth;regulation of root meristem growth;trichome morphogenesis;histone modification;actin nucleat…	plasma membrane	protein binding;kinase activity;kinase binding;receptor serine/threonine kinase binding
348	AT5G12370	no_paralog	SEC10	2.83	HS-CX:1.00	1/35	CdMEKK9/CdMEKK10	actin filament organization	exocyst;cytoplasm;plasma membrane;plasmodesma;membrane	na
349	AT5G16250	AT3G02640	na	2.83	AT-CX:1.00	1/35	CdMEKK13	na	chloroplast	na
350	AT1G69040	no_paralog	ACR4	2.82	AT-CX:1.00	1/35	CdRAF19	regulation of cellular amino acid metabolic process;response to cytokinin	cytosol;chloroplast	na
351	AT2G39050	no_paralog	EULS3	2.82	AT-CX:1.00	1/35	CdRAF3	na	nucleus;cytoplasm	carbohydrate binding
352	AT5G60080	no_paralog	na	2.82	AT-PG:1.00	1/35	CdZIK1	na	plasma membrane	kinase activity
353	AT3G45920	no_paralog	na	2.82	AT-PG:1.00	1/35	CdRAF15/CdRAF25	na	nucleus	na
354	AT5G55040	no_paralog	na	2.82	AT-CX:1.00	1/35	CdRAF36	nuclear-transcribed mRNA catabolic process	nucleus	DNA binding
355	AT1G64830	no_paralog	na	2.81	AT-CX:1.00	1/35	CdRAF6/CdRAF23	proteolysis	extracellular region	na
356	AT1G79920	no_paralog	Hsp70-15	2.81	HS-LC:1.00	1/35	CdMEKK9/CdMEKK10	na	cell wall;nucleus;cytosol;plasma membrane;plasmodesma	na
357	AT3G12690	no_paralog	AGC1.5	2.8	AT-PG:1.00	1/35	CdZIK3	unidimensional cell growth;plant-type cell wall modification;pollen tube growth;cellular process involved in reproduction;pollen tube development	nucleus	protein binding;kinase activity
358	AT1G26150	no_paralog	PERK10	2.8	AT-PG:1.00	1/35	CdZIK3	na	plasma membrane	protein kinase activity
359	AT4G14350	AT3G23310	na	2.78	HS-LC:1.00	1/35	CdMEKK9/CdMEKK10	protein phosphorylation	nucleus;cytoplasm;cytosol;plasma membrane;phragmoplast	protein kinase activity;ATP binding;kinase activity
360	AT1G18250	AT1G73620	ATLP-1	2.77	AT-CX:1.00	1/35	CdMEKK13	microtubule cytoskeleton organization;cytokinesis by cell plate formation;cell proliferation;regulation of meristem growth;response to other organism	extracellular region	na
361	AT4G28200	no_paralog	na	2.75	AT-CX:1.00	1/35	CdMEKK13	mitotic cell cycle;mRNA splicing, via spliceosome;karyogamy;RNA methylation;RNA processing;mRNA export from nucleus;protein import into nucleus;protein targeting to mitochondrion;embryo sac egg cell differentiation;photomorphogenesis;regulation of flower development;maintenance of meristem identity;cullin deneddylation;protein ubiquitination;histone methylation;protein deubiquitination;production…	nucleus	na
362	AT2G40120	no_paralog	na	2.74	AT-PG:1.00	1/35	CdRAF15/CdRAF25	protein autophosphorylation	nucleus;cytoplasm	protein serine/threonine kinase activity;kinase activity
363	AT2G40560	no_paralog	na	2.74	AT-PG:1.00	1/35	CdRAF6/CdRAF23	na	plasma membrane	kinase activity
364	AT4G26620	AT5G55900	na	2.73	AT-CX:1.00	1/35	CdMEKK13	na	nucleus;cytosol	na
365	AT1G51620	no_paralog	na	2.73	AT-PG:1.00	1/35	CdZIK4	respiratory burst involved in defense response;response to chitin;proline transport	nucleus;plasma membrane	kinase activity
366	AT4G15830	no_paralog	na	2.73	AT-CX:1.00	1/35	CdMEKK13	microtubule cytoskeleton organization;cytokinesis by cell plate formation;response to cyclopentenone;spindle assembly	cytoplasm	na
367	AT4G34220	AT2G15300	na	2.72	AT-PG:1.00	1/35	CdMEKK7	protein phosphorylation;transmembrane receptor protein tyrosine kinase signaling pathway	na	protein serine/threonine kinase activity;ATP binding
368	AT5G22920	no_paralog	na	2.72	AT-CX:1.00	1/35	CdRAF16/CdRAF30/CdRAF33	na	nucleus	zinc ion binding
369	AT3G27000	no_paralog	WRM	2.71	HS-CX:1.00	1/35	CdMEKK9/CdMEKK10	cell morphogenesis;actin filament organization;multidimensional cell growth;trichome morphogenesis;actin filament-based process;actin cytoskeleton organization	cytoplasm;Arp2/3 protein complex	structural constituent of cytoskeleton
370	AT3G30775	no_paralog	PRODH	2.7	AT-CX:1.00	1/35	CdRAF16/CdRAF30/CdRAF33	glutamate biosynthetic process;proline catabolic process;response to oxidative stress;response to water deprivation;defense response to bacterium	mitochondrion	proline dehydrogenase activity
371	AT4G02080	AT1G02620	SAR2	2.7	AT-CX:1.00	1/35	CdRAF15/CdRAF25	cell morphogenesis;glycolytic process;ubiquitin-dependent protein catabolic process;protein targeting to vacuole;water transport;hyperosmotic response;Golgi organization;vacuole organization;response to temperature stimulus;response to salt stress;photorespiration;cell growth;response to cadmium ion;Golgi vesicle transport;response to misfolded protein;proteasome core complex assembly	plasma membrane	GTP binding
372	AT3G45440	no_paralog	na	2.69	AT-PG:1.00	1/35	CdMEKK7	na	plasma membrane	kinase activity;carbohydrate binding
373	AT5G66750	no_paralog	SOM4	2.68	HS-CX:1.00	1/35	CdMEKK9/CdMEKK10	chromatin silencing;maintenance of chromatin silencing;methylation-dependent chromatin silencing;regulation of gene expression by genetic imprinting;cell proliferation;DNA mediated transformation;RNA interference;histone phosphorylation;chromatin silencing by small RNA;transposition, RNA-mediated;regulation of DNA methylation;histone H3-K9 methylation;positive regulation of histone H3-K9 methylat…	nucleosome;nucleus	ATP-dependent DNA helicase activity;helicase activity;protein binding;ATPase activity
374	AT5G18410	no_paralog	SRA1	2.68	AT-CX:1.00	1/35	CdRAF19	microtubule cytoskeleton organization;chromatin silencing;microtubule nucleation;pollen tube growth;leaf morphogenesis;trichome morphogenesis;histone phosphorylation;actin cytoskeleton organization;actin nucleation;spindle assembly;protein polymerization;histone H3-K9 methylation	cytoplasm;SCAR complex	protein binding
375	AT3G45790	no_paralog	na	2.67	AT-PG:1.00	1/35	CdZIK3	na	plasma membrane	kinase activity
376	AT2G34290	no_paralog	na	2.66	AT-PG:1.00	1/35	CdZIK1	na	na	kinase activity
377	AT5G18090	no_paralog	na	2.65	AT-CX:1.00	1/35	CdMEKK11/CdMEKK12	regulation of transcription, DNA-templated	nucleus	DNA binding;sequence-specific DNA binding transcription factor activity
378	AT1G04340	AT5G43460	na	2.65	AT-CX:1.00	1/35	CdMEKK9/CdMEKK10	na	chloroplast	na
379	AT2G29570	AT1G07370	PCNA2	2.64	AT-CX:1.00	1/35	CdMEKK13	DNA replication;DNA-dependent DNA replication;regulation of DNA replication;DNA methylation;cell proliferation;error-prone translesion synthesis;histone H3-K9 methylation	nucleus	DNA binding;protein binding;DNA polymerase processivity factor activity
380	AT5G35370	no_paralog	na	2.64	AT-PG:1.00	1/35	CdZIK3	na	plasma membrane	kinase activity;carbohydrate binding
381	AT3G18130	AT1G48630	RACK1C_AT	2.62	AT-CX:1.00	1/35	CdMEKK13	RNA methylation;nucleotide biosynthetic process;pyrimidine ribonucleotide biosynthetic process;seed germination;root development;shoot system development;cellular response to abscisic acid stimulus	nucleolus;heterotrimeric G-protein complex	nucleotide binding
382	AT1G61460	no_paralog	na	2.62	AT-PG:1.00	1/35	CdMEKK8	na	plasma membrane	kinase activity;carbohydrate binding
383	AT5G50360	no_paralog	na	2.61	AT-CX:1.00	1/35	CdRAF3	na	nucleus	na
384	AT4G26110	no_paralog	NAP1;1	2.61	AT-CX:1.00	1/35	CdMEKK13	DNA repair;nucleosome assembly	nucleus;cytoplasm;cytosol;plasma membrane	DNA binding
385	AT4G35290	AT2G17260	GLUR2	2.61	AT-HT:1.00	1/35	CdZIK2	cellular calcium ion homeostasis;cellular sodium ion homeostasis;response to light stimulus;cellular cation homeostasis;cellular potassium ion homeostasis	extracellular region	intracellular ligand-gated ion channel activity
386	AT4G38830	no_paralog	CRK26	2.61	AT-HT:1.00	1/35	CdZIK2	iron ion transport;cellular response to iron ion starvation;response to nitrate;nitrate transport	extracellular region	kinase activity
387	AT5G53130	no_paralog	CNGC1	2.61	AT-HT:1.00	1/35	CdZIK2	potassium ion transport;calcium ion transport	plasma membrane	intracellular cyclic nucleotide activated cation channel activity;inward rectifier potassium channel activity;cation channel activity;calmodulin binding;cyclic nucleotide binding
388	AT3G19590	AT1G49910	BUB3.1	2.59	AT-CX:1.00	1/35	CdMEKK13	microtubule cytoskeleton organization;cytokinesis by cell plate formation;mitotic spindle assembly checkpoint;cell proliferation;DNA endoreduplication;proteasome-mediated ubiquitin-dependent protein catabolic process;proteasome assembly;regulation of unidimensional cell growth;response to misfolded protein	kinetochore;nucleus;phragmoplast;Cul4-RING ubiquitin ligase complex	nucleotide binding;protein binding
389	AT5G66400	no_paralog	RAB18	2.59	AT-CX:1.00	1/35	CdRAF3	response to water deprivation;cold acclimation;response to abscisic acid;response to 1-aminocyclopropane-1-carboxylic acid	na	na
390	AT1G61580	no_paralog	RPL3B	2.59	AT-CX:1.00	1/35	CdMEKK13	translation;nucleotide biosynthetic process;plant-type cell wall cellulose metabolic process;cell wall pectin metabolic process	cytoplasm;ribosome;membrane;cytosolic large ribosomal subunit	structural constituent of ribosome
391	AT4G37740	AT2G22840	GRF2	2.59	AT-CX:1.00	1/35	CdRAF19	response to abscisic acid;embryo development ending in seed dormancy;seed germination;leaf morphogenesis;seed dormancy process;leaf development	nucleus	na
392	AT4G29050	no_paralog	na	2.58	AT-PG:1.00	1/35	CdZIK1	na	plasma membrane	kinase activity;carbohydrate binding
393	AT5G55910	AT4G26610	D6PK	2.56	AT-PG:1.00	1/35	CdZIK2	protein phosphorylation;basipetal auxin transport;regulation of protein localization	nucleus;basal plasma membrane	protein kinase activity;protein binding;kinase activity
394	AT2G41920	no_paralog	na	2.56	AT-PG:1.00	1/35	CdZIK1	na	na	kinase activity
395	AT1G79000	AT1G16710	PCAT2	2.56	AT-CX:1.00	1/35	CdRAF29/CdRAF35	regulation of transcription, DNA-templated;regulation of transcription from RNA polymerase II promoter;protein acetylation;DNA mediated transformation;flower development;photoperiodism, flowering	nucleus	transcription cofactor activity;histone acetyltransferase activity
396	AT1G06420	no_paralog	na	2.55	AT-CX:1.00	1/35	CdRAF15/CdRAF25	na	na	na
397	AT3G07370	no_paralog	CHIP	2.54	HS-LC:1.00	1/35	CdMEKK9/CdMEKK10	signal transduction;response to temperature stimulus;response to heat;response to water deprivation;response to symbiotic fungus;response to wounding;response to salt stress;response to ethylene;response to auxin;response to abscisic acid;abscisic acid-activated signaling pathway;response to jasmonic acid;protein ubiquitination;hyperosmotic salinity response	cytoplasm	ubiquitin-protein ligase activity;chaperone binding
398	AT3G12110	no_paralog	ACT11	2.54	HS-LC:1.00	1/35	CdRAF11/CdRAF22/CdRAF34	gluconeogenesis;cytoskeleton organization;proteasomal protein catabolic process;actin cytoskeleton organization	cytoplasm;mitochondrion;cytoskeleton;plasma membrane;plasmodesma;chloroplast stroma;chloroplast envelope	structural constituent of cytoskeleton
399	AT1G68440	AT1G25400	na	2.53	AT-CX:1.00	1/35	CdMEKK11/CdMEKK12	polyamine catabolic process;phenylpropanoid metabolic process;cellular modified amino acid biosynthetic process	nucleus	na
400	AT1G03290	AT4G02880	na	2.51	AT-CX:1.00	1/35	CdRAF15/CdRAF25	N-terminal protein myristoylation	extracellular region	na
401	AT4G23700	AT1G64170	CHX17	2.5	AT-CX:1.00	1/35	CdZIK4	protein targeting to vacuole;cation transport;regulation of pH;toxin catabolic process;organ senescence;response to cyclopentenone;sodium ion transmembrane transport	nucleus;late endosome	monovalent cation:hydrogen antiporter activity;sodium:hydrogen antiporter activity
402	AT1G49160	AT3G18750	WNK7	2.5	AT-PG:1.00	1/35	CdMEKK8	protein phosphorylation	plasma membrane	protein kinase activity;kinase activity
403	AT5G53520	no_paralog	OPT8	2.49	AT-CX:1.00	1/35	CdRAF12	oligopeptide transport;pollen sperm cell differentiation	cytoplasm;membrane	oligopeptide transporter activity
404	AT5G60300	AT3G45330	LecRK-I.9	2.49	AT-PG:1.00	1/35	CdMEKK7	defense response to oomycetes;jasmonic acid metabolic process;response to jasmonic acid;focal adhesion assembly	plasma membrane	kinase activity;carbohydrate binding
405	AT3G10380	no_paralog	SEC8	2.48	AT-CX:1.00	1/35	CdRAF29/CdRAF35	glucose catabolic process;pollen germination;pollen tube growth;mucilage biosynthetic process involved in seed coat development	exocyst;nucleus;cytosol;plasma membrane;plasmodesma	protein binding
406	AT5G58720	no_paralog	na	2.48	AT-HT:1.00	1/35	CdRAF11/CdRAF22/CdRAF34	nuclear-transcribed mRNA catabolic process;mismatch repair	nucleus;cytoplasm	damaged DNA binding;ATP binding
407	AT5G55520	AT4G26660	na	2.47	AT-CX:1.00	1/35	CdMEKK13	microtubule cytoskeleton organization;mitotic cell cycle;cytokinesis by cell plate formation;cell fate specification;regulation of flower development;gene silencing;histone phosphorylation;histone lysine methylation;spindle assembly	chloroplast	na
408	AT3G46140	no_paralog	na	2.47	AT-PG:1.00	1/35	CdZIK4	na	mitochondrion	kinase activity
409	AT3G51280	no_paralog	na	2.47	AT-CX:1.00	1/35	CdMEKK13	DNA replication;DNA replication initiation;regulation of DNA replication;DNA methylation;cell proliferation;histone H3-K9 methylation;regulation of cell cycle	na	na
410	AT1G57980	no_paralog	na	2.43	AT-HT:1.00	1/35	CdZIK2	nucleobase-containing compound transport	na	purine nucleobase transmembrane transporter activity
411	AT5G49770	no_paralog	na	2.43	AT-HT:1.00	1/35	CdZIK2	protein phosphorylation;transmembrane receptor protein tyrosine kinase signaling pathway	extracellular region	protein serine/threonine kinase activity;ATP binding
412	AT1G78000	AT1G22150	SULTR1;2	2.43	AT-HT:1.00	1/35	CdZIK2	transition metal ion transport;oligopeptide transport;sulfate transport;cellular response to sulfate starvation;response to nitrate;nitrate transport;selenate transport	plasma membrane	sulfate transmembrane transporter activity
413	AT1G04360	AT5G43420	na	2.43	AT-HT:1.00	1/35	CdZIK2	na	nucleus	zinc ion binding
414	AT1G15000	no_paralog	scpl50	2.43	HS-LC:1.00	1/35	CdMEKK9/CdMEKK10	proteolysis	extracellular region;vacuole	serine-type carboxypeptidase activity
415	AT1G35183	no_paralog	na	2.42	AT-CX:1.00	1/35	CdRAF12	na	nucleus	na
416	AT3G44050	no_paralog	na	2.42	AT-CX:1.00	1/35	CdMEKK13	microtubule cytoskeleton organization;mitotic cell cycle;cytokinesis by cell plate formation;methylation-dependent chromatin silencing;regulation of flower development;epidermal cell fate specification;gene silencing;histone phosphorylation;chromatin silencing by small RNA;histone lysine methylation;spindle assembly;histone H3-K9 methylation	cytoplasm	microtubule motor activity
417	AT5G54200	no_paralog	na	2.41	AT-CX:1.00	1/35	CdRAF15/CdRAF25	signal transduction	cytoplasm;heterotrimeric G-protein complex	signal transducer activity
418	AT3G06150	AT5G19060	na	2.41	AT-CX:1.00	1/35	CdZIK1	na	na	na
419	AT4G22440	no_paralog	na	2.4	AT-CX:1.00	1/35	CdRAF6/CdRAF23	na	mitochondrion	na
420	AT1G22140	no_paralog	na	2.4	AT-CX:1.00	1/35	CdRAF15/CdRAF25	na	chloroplast	na
421	AT5G13960	no_paralog	SUVH4	2.4	AT-CX:1.00	1/35	CdMEKK13	microtubule cytoskeleton organization;cytokinesis by cell plate formation;DNA replication;DNA replication initiation;regulation of DNA replication;DNA methylation;chromatin silencing;methylation-dependent chromatin silencing;cell-cell signaling;cell proliferation;virus induced gene silencing;photomorphogenesis;determination of bilateral symmetry;meristem initiation;meristem maintenance;maintenanc…	nucleus	methyl-CpG binding;double-stranded methylated DNA binding;methyl-CpNpG binding;methyl-CpNpN binding;histone methyltransferase activity (H3-K9 specific)
422	AT4G26610	AT5G55910	D6PKL1	2.39	AT-PG:1.00	1/35	CdZIK2	na	nucleus	protein binding;kinase activity
423	AT3G17520	no_paralog	na	2.38	AT-CX:1.00	1/35	CdRAF3	fatty acid catabolic process;embryo development ending in seed dormancy	na	na
424	AT1G63100	no_paralog	na	2.37	AT-CX:1.00	1/35	CdMEKK13	microtubule cytoskeleton organization;cytokinesis by cell plate formation;regulation of transcription, DNA-templated;petal formation;sepal formation	nucleus	sequence-specific DNA binding transcription factor activity
425	AT1G54320	no_paralog	na	2.37	AT-CX:1.00	1/35	CdRAF13	na	Golgi apparatus;membrane	protein binding
426	AT3G15350	AT1G53100	na	2.36	AT-CX:1.00	1/35	CdRAF3	carbohydrate biosynthetic process	Golgi apparatus;integral component of membrane	acetylglucosaminyltransferase activity;transferase activity, transferring glycosyl groups
427	AT5G22310	no_paralog	na	2.35	AT-HT:1.00	1/35	CdRAF11/CdRAF22/CdRAF34	na	na	na
428	AT3G53210	no_paralog	UMAMIT6	2.35	AT-CX:1.00	1/35	CdRAF19	fatty acid catabolic process	chloroplast;membrane	na
429	AT5G04760	AT3G10580	na	2.34	AT-CX:1.00	1/35	CdRAF3	regulation of transcription, DNA-templated;heat acclimation	nucleus	DNA binding;sequence-specific DNA binding transcription factor activity
430	AT5G55210	no_paralog	na	2.34	AT-CX:1.00	1/35	CdRAF15/CdRAF25	na	nucleus	na
431	AT1G76450	no_paralog	na	2.33	AT-CX:1.00	1/35	CdRAF19	maltose metabolic process;pentose-phosphate shunt;rRNA processing;response to blue light;chloroplast relocation;thylakoid membrane organization;response to red light;response to far red light;photosynthesis;chlorophyll biosynthetic process;starch biosynthetic process;ncRNA metabolic process;transcription from plastid promoter	chloroplast;chloroplast thylakoid membrane;chloroplast thylakoid lumen;thylakoid;thylakoid lumen	na
432	AT4G17180	no_paralog	na	2.33	AT-CX:1.00	1/35	CdRAF13	na	plasma membrane	hydrolase activity, hydrolyzing O-glycosyl compounds
433	AT1G22930	no_paralog	na	2.32	AT-CX:1.00	1/35	CdRAF3	na	nucleus;plasmodesma	na
434	AT5G49970	no_paralog	PPOX	2.32	AT-CX:1.00	1/35	CdRAF10/CdRAF17	pyridoxine biosynthetic process;glucosinolate biosynthetic process;pyridoxal metabolic process	extracellular region;cytosol;chloroplast	pyridoxamine-phosphate oxidase activity
435	AT5G61570	AT5G07620	na	2.32	AT-PG:1.00	1/35	CdRAF15/CdRAF25	na	extracellular region	kinase activity
436	AT4G21580	no_paralog	na	2.32	AT-CX:1.00	1/35	CdMEKK11/CdMEKK12	response to symbiotic fungus	cytoplasm;mitochondrion;cytosol	zinc ion binding
437	AT3G07320	no_paralog	na	2.32	AT-CX:1.00	1/35	CdMEKK13	na	plasma membrane;plant-type cell wall;plasmodesma	hydrolase activity, hydrolyzing O-glycosyl compounds
438	AT3G11800	no_paralog	na	2.31	AT-CX:1.00	1/35	CdZIK1	na	extracellular region	na
439	AT4G24220	no_paralog	VEP1	2.31	AT-CX:1.00	1/35	CdZIK1	steroid metabolic process;response to wounding;xylem and phloem pattern formation	cytosol	enone reductase activity
440	AT2G23970	AT4G30530	na	2.29	AT-CX:1.00	1/35	CdRAF12	defense response	cytoplasm	na
441	AT3G22960	no_paralog	PKP1	2.29	AT-HT:1.00	1/35	CdRAF11/CdRAF22/CdRAF34	glycolytic process;lipid metabolic process;plant-type cell wall biogenesis;seed maturation;cell growth;sterol biosynthetic process;cellulose metabolic process;response to cadmium ion	chloroplast;chloroplast stroma	magnesium ion binding;pyruvate kinase activity;potassium ion binding
442	AT4G15545	no_paralog	na	2.29	AT-CX:1.00	1/35	CdRAF36	water transport;response to blue light;response to salt stress;response to fructose;regulation of meristem growth;regulation of proton transport;hydrogen peroxide catabolic process;protein autophosphorylation	na	na
443	AT3G17790	no_paralog	PAP17	2.29	AT-CX:1.00	1/35	CdRAF3	cellular response to phosphate starvation;galactolipid biosynthetic process;cellular phosphate ion homeostasis;response to hydrogen peroxide;negative regulation of transcription, DNA-templated	extracellular region;cell surface	acid phosphatase activity;protein serine/threonine phosphatase activity;phosphatase activity
444	AT5G37010	no_paralog	na	2.28	AT-CX:1.00	1/35	CdMEKK13	microtubule cytoskeleton organization;cytokinesis by cell plate formation;DNA replication;regulation of DNA replication;DNA methylation;chromatin silencing;methylation-dependent chromatin silencing;cell proliferation;regulation of flower development;epidermal cell fate specification;regulation of G2/M transition of mitotic cell cycle;gene silencing;histone phosphorylation;chromatin silencing by s…	nucleus	na
445	AT3G18940	no_paralog	na	2.28	AT-CX:1.00	1/35	CdMEKK13	fatty acid beta-oxidation	nucleus	na
446	AT1G52190	AT3G16180	na	2.28	AT-HT:1.00	1/35	CdZIK2	oligopeptide transport	plasma membrane;membrane	transporter activity
447	AT3G15450	no_paralog	na	2.28	AT-CX:1.00	1/35	CdRAF16/CdRAF30/CdRAF33	response to sucrose;response to fructose	chloroplast	na
448	AT1G05100	AT2G32510	MAPKKK18	2.28	AT-CX:1.00	1/35	CdRAF3	na	na	kinase activity
449	AT5G39390	no_paralog	na	2.28	AT-PG:1.00	1/35	CdZIK4	na	plasma membrane	protein kinase activity
450	AT3G55160	no_paralog	na	2.27	AT-CX:1.00	1/35	CdMEKK13	nucleotide biosynthetic process	cytosol;chloroplast	na
451	AT1G69480	no_paralog	na	2.27	AT-CX:1.00	1/35	CdRAF3	phosphate ion transport;cellular response to phosphate starvation	plasma membrane;integral component of membrane	na
452	AT5G63670	no_paralog	SPT42	2.27	AT-CX:1.00	1/35	CdRAF20/CdRAF27	RNA splicing, via endonucleolytic cleavage and ligation;transcription from RNA polymerase II promoter	nucleus	na
453	AT3G51800	no_paralog	EBP1	2.27	AT-CX:1.00	1/35	CdMEKK13	RNA methylation;purine nucleotide biosynthetic process;proteolysis;protein import into nucleus;pyrimidine ribonucleotide biosynthetic process;photomorphogenesis;cullin deneddylation	nucleus;nucleolus;plasma membrane	metalloexopeptidase activity
454	AT3G14370	AT1G53700	WAG2	2.26	AT-PG:1.00	1/35	CdZIK1	auxin polar transport;root development;lateral root development;developmental growth;root hair cell differentiation;cotyledon development	nucleus	protein serine/threonine kinase activity;kinase activity
455	AT3G57540	AT2G41870	na	2.26	AT-CX:1.00	1/35	CdRAF3	na	nucleus	DNA binding
456	AT3G46000	no_paralog	ADF2	2.26	HS-LC:1.00	1/35	CdMEKK9/CdMEKK10	cell morphogenesis;protein targeting to vacuole;cell growth;Golgi vesicle transport	intracellular;nucleus;cytoplasm;plasma membrane	na
457	AT1G01750	no_paralog	ADF11	2.26	HS-LC:1.00	1/35	CdMEKK9/CdMEKK10	na	intracellular;nucleus	na
458	AT3G46010	AT5G59880	ATADF1	2.26	HS-LC:1.00	1/35	CdMEKK9/CdMEKK10	actin filament organization;actin filament depolymerization	intracellular;cytoplasm;chloroplast	actin binding
459	AT2G31200	no_paralog	ATADF6	2.26	HS-LC:1.00	1/35	CdMEKK9/CdMEKK10	na	intracellular;cytoplasm	na
460	AT5G44670	AT4G20170	GALS2	2.25	AT-CX:1.00	1/35	CdRAF13	cell wall biogenesis	cytoplasm;vacuole	na
461	AT4G32300	no_paralog	SD2-5	2.25	AT-PG:1.00	1/35	CdMEKK3/CdMEKK5	protein autophosphorylation	plasma membrane	protein kinase activity;kinase activity;carbohydrate binding;ubiquitin protein ligase binding
462	AT3G45410	no_paralog	na	2.24	AT-PG:1.00	1/35	CdZIK3	transition metal ion transport;iron ion transport;response to zinc ion;cellular response to iron ion starvation;response to nitrate;nitrate transport;protein autophosphorylation;cellular response to ethylene stimulus;cellular response to salt stress	plasma membrane	protein serine/threonine kinase activity;transmembrane receptor protein serine/threonine kinase activity;kinase activity
463	AT2G37620	AT3G53750	ACT1	2.24	HS-LC:1.00	1/35	CdRAF11/CdRAF22/CdRAF34	cytoskeleton organization;developmental growth;root hair elongation	cell wall;cytoplasm;cytosol;cytoskeleton;plasma membrane;plasmodesma	structural constituent of cytoskeleton
464	AT3G53750	AT2G37620	ACT3	2.24	HS-LC:1.00	1/35	CdRAF11/CdRAF22/CdRAF34	cytoskeleton organization	cell wall;nucleus;cytoplasm;cytoskeleton;plasmodesma;apoplast	structural constituent of cytoskeleton
465	AT1G08780	no_paralog	PFD4	2.24	HS-LC:1.00	1/35	CdMEKK9/CdMEKK10	protein folding	nucleus;cytosol	protein binding
466	AT3G15610	AT1G52730 AT1G15470	na	2.23	AT-CX:1.00	1/35	CdRAF15/CdRAF25	na	cytoplasm;cytosol;Cul4-RING ubiquitin ligase complex	nucleotide binding
467	AT5G06760	no_paralog	LEA4-5	2.23	AT-CX:1.00	1/35	CdRAF3	response to osmotic stress;response to cold;response to water deprivation;embryo development ending in seed dormancy;seed development	na	na
468	AT3G59260	no_paralog	na	2.23	AT-CX:1.00	1/35	CdRAF13	petal morphogenesis	nucleus	calmodulin binding
469	AT3G02640	AT5G16250	na	2.23	AT-CX:1.00	1/35	CdMEKK13	na	mitochondrion	na
470	AT3G17160	no_paralog	na	2.23	AT-CX:1.00	1/35	CdMEKK13	na	nucleus	na
471	AT5G54940	no_paralog	na	2.22	AT-CX:1.00	1/35	CdMEKK11/CdMEKK12	translational initiation	na	translation initiation factor activity
472	AT1G18370	no_paralog	NACK1	2.22	AT-CX:1.00	1/35	CdMEKK13	microtubule cytoskeleton organization;cytokinesis;cytokinesis by cell plate formation;cell proliferation;pollen development;embryo sac cellularization;response to cyclopentenone;histone phosphorylation;gametophyte development	cytoplasm	microtubule motor activity
473	AT1G60140	no_paralog	TPS10	2.22	AT-CX:1.00	1/35	CdRAF16/CdRAF30/CdRAF33	trehalose biosynthetic process	nucleus	trehalose-phosphatase activity;transferase activity, transferring glycosyl groups
474	AT1G79750	no_paralog	NADP-ME4	2.22	HS-HT:1.00	1/35	CdZIK1	gluconeogenesis;malate metabolic process;fatty acid biosynthetic process;cytoskeleton organization;proteasomal protein catabolic process;protein homotetramerization	chloroplast	malic enzyme activity;malate dehydrogenase (decarboxylating) (NADP+) activity;zinc ion binding;oxidoreductase activity, acting on NAD(P)H, NAD(P) as acceptor;protein homodimerization activity;cobalt ion binding
475	AT5G25880	AT5G11670	NADP-ME3	2.22	HS-HT:1.00	1/35	CdZIK1	gluconeogenesis;malate metabolic process;cytoskeleton organization;plant-type cell wall modification;pollen tube growth;proteasomal protein catabolic process;protein homooligomerization	cytosol;chloroplast	malic enzyme activity;malate dehydrogenase (decarboxylating) (NADP+) activity;oxidoreductase activity, acting on NAD(P)H, NAD(P) as acceptor
476	AT5G11670	AT5G25880	NADP-ME2	2.22	HS-HT:1.00	1/35	CdZIK1	gluconeogenesis;malate metabolic process;protein targeting to membrane;response to osmotic stress;cytoskeleton organization;pentose-phosphate shunt, oxidative branch;positive regulation of flavonoid biosynthetic process;regulation of plant-type hypersensitive response;proteasomal protein catabolic process;response to cadmium ion;root hair elongation;protein homooligomerization	cell wall;vacuolar membrane;cytosol;plasma membrane;plasmodesma;chloroplast;membrane;apoplast	malic enzyme activity;malate dehydrogenase (decarboxylating) (NADP+) activity;oxidoreductase activity, acting on NAD(P)H, NAD(P) as acceptor
477	AT4G27410	no_paralog	RD26	2.21	AT-CX:1.00	1/35	CdRAF3	signal transduction;multicellular organismal development;response to cold;response to water deprivation;response to wounding;response to ethylene;response to auxin;response to abscisic acid;abscisic acid-activated signaling pathway;response to jasmonic acid;hyperosmotic salinity response;positive regulation of transcription, DNA-templated	nucleus	sequence-specific DNA binding transcription factor activity
478	AT3G02150	no_paralog	TFPD	2.21	AT-HT:1.00	1/35	CdRAF19	regulation of transcription, DNA-templated;jasmonic acid metabolic process;response to jasmonic acid;leaf morphogenesis;cell differentiation;regulation of defense response;positive regulation of development, heterochronic;leaf development	nucleus;chloroplast	sequence-specific DNA binding transcription factor activity;protein binding
479	AT5G59890	no_paralog	ATADF4	2.21	HS-LC:1.00	1/35	CdMEKK9/CdMEKK10	defense response signaling pathway, resistance gene-dependent;defense response to bacterium	intracellular;cytoplasm	na
480	AT1G23870	AT1G70290	TPS9	2.21	AT-CX:1.00	1/35	CdRAF16/CdRAF30/CdRAF33	trehalose biosynthetic process;response to sucrose;response to fructose	nucleus	trehalose-phosphatase activity;transferase activity, transferring glycosyl groups
481	AT5G09810	no_paralog	AtACT7	2.21	HS-LC:1.00	1/35	CdRAF11/CdRAF22/CdRAF34	glucose catabolic process;gluconeogenesis;cytoskeleton organization;response to light stimulus;response to wounding;response to auxin;seed germination;root epidermal cell differentiation;proteasomal protein catabolic process;regulation of protein localization;root development;root hair elongation;cell division	cell wall;nucleolus;cytoplasm;mitochondrion;cytosol;cytoskeleton;plasma membrane;plasmodesma;chloroplast stroma;chloroplast envelope	structural constituent of cytoskeleton;protein binding
482	AT1G29990	no_paralog	PFD6	2.2	HS-LC:1.00	1/35	CdMEKK9/CdMEKK10	gluconeogenesis;glycolytic process;protein folding;response to salt stress;cortical microtubule organization;response to cadmium ion	cytoplasm;cytosol;plasma membrane;prefoldin complex	na
483	AT4G37250	AT2G23300 AT5G67280	na	2.2	AT-PG:1.00	1/35	CdZIK2	protein phosphorylation;transmembrane receptor protein tyrosine kinase signaling pathway	extracellular region	protein serine/threonine kinase activity;ATP binding;kinase activity
484	AT1G72250	no_paralog	na	2.2	AT-CX:1.00	1/35	CdMEKK13	microtubule cytoskeleton organization;cytokinesis by cell plate formation;DNA methylation;chromatin silencing;methylation-dependent chromatin silencing;regulation of flower development;gene silencing;gene silencing by RNA;chromatin silencing by small RNA;histone lysine methylation;petal formation;sepal formation;histone H3-K9 methylation	cytoplasm	microtubule motor activity
485	AT4G21400	no_paralog	CRK28	2.2	AT-PG:1.00	1/35	CdZIK3	respiratory burst involved in defense response;response to chitin	extracellular region	kinase activity
486	AT5G57670	no_paralog	na	2.19	AT-PG:1.00	1/35	CdZIK3	response to molecule of fungal origin	nucleus	na
487	AT1G74960	no_paralog	KAS2	2.19	AT-CX:1.00	1/35	CdMEKK13	very long-chain fatty acid metabolic process;sulfur amino acid metabolic process;glycine catabolic process;fatty acid biosynthetic process;unsaturated fatty acid biosynthetic process;oxidoreduction coenzyme metabolic process;vitamin metabolic process;cellular amino acid biosynthetic process;aromatic amino acid family metabolic process;lipoate metabolic process;coenzyme biosynthetic process;nucleo…	chloroplast;plastid;chloroplast stroma	fatty acid synthase activity;3-oxoacyl-[acyl-carrier-protein] synthase activity
488	AT4G00680	no_paralog	ADF8	2.19	HS-LC:1.00	1/35	CdMEKK9/CdMEKK10	na	intracellular;cytoplasm	na
489	AT2G37870	no_paralog	na	2.19	AT-CX:1.00	1/35	CdRAF3	lipid transport	extracellular region;plasmodesma	lipid binding
490	AT1G30600	AT4G20430	na	2.18	AT-CX:1.00	1/35	CdMEKK13	proteolysis;metabolic process	extracellular region;plant-type cell wall;plasmodesma	serine-type endopeptidase activity
491	AT2G35300	no_paralog	LEA4-2	2.18	AT-CX:1.00	1/35	CdRAF3	response to osmotic stress;response to water deprivation;response to abscisic acid;embryo development ending in seed dormancy;seed germination;seed dormancy process;seed development;pollen tube development	na	na
492	AT1G59540	no_paralog	ZCF125	2.18	AT-CX:1.00	1/35	CdMEKK13	microtubule cytoskeleton organization;mitotic cell cycle;nuclear division;cytokinesis by cell plate formation;DNA replication;DNA replication initiation;regulation of DNA replication;DNA methylation;chromatin silencing;methylation-dependent chromatin silencing;cell proliferation;regulation of flower development;regulation of G2/M transition of mitotic cell cycle;gene silencing;histone modificatio…	cytoplasm	microtubule motor activity
493	AT4G30690	AT2G24060	na	2.18	AT-CX:1.00	1/35	CdZIK1	translational initiation	cell wall;cytoplasm;chloroplast	translation initiation factor activity
494	AT1G03090	no_paralog	MCCA	2.18	AT-CX:1.00	1/35	CdRAF16/CdRAF30/CdRAF33	leucine catabolic process;response to sucrose;response to fructose	mitochondrion;cytosolic ribosome	methylcrotonoyl-CoA carboxylase activity;cobalt ion binding
495	AT5G48450	no_paralog	sks3	2.18	AT-CX:1.00	1/35	CdRAF19	na	extracellular region;plasma membrane;plasmodesma	copper ion binding
496	AT1G01090	no_paralog	PDH-E1 ALPHA	2.18	AT-CX:1.00	1/35	CdRAF19	metabolic process	mitochondrion;chloroplast;plastid;chloroplast stroma;chloroplast envelope	pyruvate dehydrogenase (acetyl-transferring) activity
497	AT3G46520	AT5G59370	ACT12	2.17	HS-LC:1.00	1/35	CdRAF11/CdRAF22/CdRAF34	gluconeogenesis;cytoskeleton organization;plant-type cell wall modification;pollen tube growth;proteasomal protein catabolic process	cytoplasm;mitochondrion;cytoskeleton;chloroplast stroma;chloroplast envelope	structural constituent of cytoskeleton
498	AT2G26730	no_paralog	na	2.17	AT-PG:1.00	1/35	CdZIK3	polysaccharide catabolic process;starch metabolic process;acetyl-CoA metabolic process;protein phosphorylation;microtubule nucleation;transmembrane receptor protein tyrosine kinase signaling pathway;pattern specification process;regulation of cell size;plant-type cell wall organization;plant-type cell wall biogenesis;auxin polar transport;root morphogenesis;regulation of meristem growth;sterol bi…	plasma membrane	protein serine/threonine kinase activity;ATP binding
499	AT4G35750	no_paralog	na	2.17	AT-CX:1.00	1/35	CdRAF16/CdRAF30/CdRAF33	na	cytoplasm	na
500	AT5G18680	AT3G06380	TLP11	2.17	AT-PG:1.00	1/35	CdZIK2	regulation of transcription, DNA-templated	nucleus	sequence-specific DNA binding transcription factor activity;phosphoric diester hydrolase activity
501	AT4G03080	AT1G03445	BSL1	2.17	AT-CX:1.00	1/35	CdRAF13	na	nucleus;plasma membrane	protein serine/threonine phosphatase activity;protein binding
502	AT5G17660	no_paralog	na	2.16	AT-CX:1.00	1/35	CdZIK1	na	nucleus	na
503	AT5G59370	AT3G46520	ACT4	2.16	HS-LC:1.00	1/35	CdRAF11/CdRAF22/CdRAF34	gluconeogenesis;cytoskeleton organization;proteasomal protein catabolic process;actin cytoskeleton organization	cytoplasm;mitochondrion	structural constituent of cytoskeleton
504	AT3G11590	no_paralog	na	2.16	AT-HT:1.00	1/35	CdRAF11/CdRAF22/CdRAF34	na	plasma membrane	na
505	AT2G27450	no_paralog	NLP1	2.16	AT-CX:1.00	1/35	CdRAF13	nitrogen compound metabolic process;putrescine biosynthetic process	na	hydrolase activity, acting on carbon-nitrogen (but not peptide) bonds;N-carbamoylputrescine amidase activity
506	AT5G12200	no_paralog	PYD2	2.15	HS-LC:1.00	1/35	CdRAF8	uracil catabolic process;fatty acid beta-oxidation;protein import into peroxisome matrix;cellular response to nitrogen levels	endoplasmic reticulum;Golgi apparatus;endomembrane system	dihydropyrimidinase activity
507	AT1G20930	AT1G76540	CDKB2;2	2.15	AT-CX:1.00	1/35	CdMEKK13	nuclear division;cytokinesis by cell plate formation;regulation of DNA replication;regulation of mitotic cell cycle;cell proliferation;hormone-mediated signaling pathway;regulation of meristem structural organization;regulation of G2/M transition of mitotic cell cycle;DNA endoreduplication;protein autophosphorylation;spindle assembly	nucleus	protein serine/threonine kinase activity;cyclin-dependent protein serine/threonine kinase activity;protein binding;kinase activity
508	AT5G49510	no_paralog	PFD3	2.14	HS-LC:1.00	1/35	CdMEKK9/CdMEKK10	protein folding	cytosol;prefoldin complex	na
509	AT3G20800	no_paralog	na	2.14	HS-LC:1.00	1/35	CdMEKK9/CdMEKK10	multicellular organismal development	nucleus	na
510	AT2G37050	no_paralog	na	2.14	AT-CX:1.00	1/35	CdRAF29/CdRAF35	na	extracellular region;plasma membrane;plasmodesma	kinase activity
511	AT5G10530	AT5G65600	na	2.14	AT-HT:1.00	1/35	CdZIK2	na	plasma membrane	kinase activity
512	AT1G69770	no_paralog	CMT3	2.12	AT-CX:1.00	1/35	CdMEKK13	DNA replication;DNA-dependent DNA replication;DNA replication initiation;regulation of DNA replication;DNA methylation;chromatin silencing;methylation-dependent chromatin silencing;cell proliferation;regulation of flower development;zygote asymmetric cytokinesis in embryo sac;DNA methylation on cytosine within a CNG sequence;gene silencing;histone phosphorylation;gene silencing by RNA;chromatin s…	nucleus	DNA (cytosine-5-)-methyltransferase activity
513	AT1G51140	no_paralog	FBH3	2.12	AT-CX:1.00	1/35	CdRAF3	regulation of transcription, DNA-templated;photoperiodism, flowering	nucleus	DNA binding;sequence-specific DNA binding transcription factor activity
514	AT2G39110	no_paralog	na	2.12	AT-PG:1.00	1/35	CdZIK3	iron ion transport;cellular response to iron ion starvation;response to nitrate;nitrate transport	plasma membrane	kinase activity
515	AT1G62870	AT1G12380	na	2.12	AT-CX:1.00	1/35	CdRAF13	na	chloroplast	na
516	AT5G53400	AT4G27890	BOB1	2.11	HS-LC:1.00	1/35	CdMEKK9/CdMEKK10	protein folding;response to heat;pollen development;response to high light intensity;embryonic pattern specification;leaf morphogenesis;inflorescence meristem growth;developmental process;response to endoplasmic reticulum stress;response to hydrogen peroxide;stamen morphogenesis;specification of floral organ number	cytoplasm;cytosol	na
517	AT4G26260	AT5G56640	MIOX4	2.1	AT-CX:1.00	1/35	CdRAF12	syncytium formation;L-ascorbic acid biosynthetic process	cytoplasm	inositol oxygenase activity
518	AT5G59880	AT3G46010	ADF3	2.1	HS-LC:1.00	1/35	CdMEKK9/CdMEKK10	gluconeogenesis;glycolytic process;response to oxidative stress;response to salt stress;response to cadmium ion	intracellular;cytoplasm;mitochondrion;cytosol;plasma membrane;plasmodesma;chloroplast	protein binding
519	AT5G13820	no_paralog	TBP1	2.1	AT-CX:1.00	1/35	CdZIK1	telomere maintenance;response to water deprivation;vegetative to reproductive phase transition of meristem;organ senescence;protein desumoylation;hyperosmotic salinity response;hydrogen peroxide biosynthetic process	chromosome, telomeric region;nucleus	DNA binding;double-stranded telomeric DNA binding;protein binding;telomeric DNA binding
520	AT5G17160	no_paralog	na	2.1	AT-CX:1.00	1/35	CdMEKK13	na	nucleus	na
521	AT5G20250	no_paralog	RS6	2.09	AT-CX:1.00	1/35	CdRAF16/CdRAF30/CdRAF33	response to oxidative stress;response to cold;response to sucrose;response to fructose;response to karrikin	cytoplasm;plasmodesma;chloroplast	hydrolase activity, hydrolyzing O-glycosyl compounds
522	AT5G61530	no_paralog	na	2.09	AT-CX:1.00	1/35	CdRAF13	protein targeting to vacuole;vesicle-mediated transport;Golgi vesicle transport	cytoplasm	Rho GTPase activator activity
523	AT1G21880	AT1G77630	LYP2	2.09	AT-CX:1.00	1/35	CdMEKK13	immune response;regulation of flower development;histone modification;cell wall macromolecule catabolic process;floral organ formation	plasma membrane;anchored component of membrane;anchored component of plasma membrane	peptidoglycan binding
524	AT1G48830	no_paralog	na	2.09	AT-CX:1.00	1/35	CdMEKK13	rRNA processing;translation;ribosomal small subunit biogenesis	cell wall;cytosol;plasma membrane;chloroplast;cytosolic ribosome;cytosolic small ribosomal subunit;90S preribosome;small-subunit processome	structural constituent of ribosome
525	AT3G48360	AT5G63160	BT2	2.08	AT-CX:1.00	1/35	CdRAF16/CdRAF30/CdRAF33	regulation of transcription, DNA-templated;circadian rhythm;response to cold;embryo sac development;pollen development;response to wounding;response to salt stress;response to auxin;auxin-activated signaling pathway;response to abscisic acid;abscisic acid-activated signaling pathway;response to carbohydrate;response to salicylic acid;response to jasmonic acid;response to nitrate;sugar mediated si…	nucleus;cytoplasm	protein binding;calmodulin binding
526	AT4G33280	no_paralog	na	2.08	AT-CX:1.00	1/35	CdRAF13	regulation of transcription, DNA-templated	nucleus;vacuole	DNA binding;sequence-specific DNA binding transcription factor activity
527	AT3G46970	no_paralog	PHS2	2.08	HS-LC:1.00	1/35	CdMEKK9/CdMEKK10	response to water deprivation;starch biosynthetic process;response to cadmium ion	cytoplasm;cytosol;chloroplast	phosphorylase activity;transferase activity, transferring glycosyl groups
528	AT1G72560	no_paralog	PSD	2.08	HS-LC:1.00	1/35	CdMEKK9/CdMEKK10	mRNA export from nucleus;tRNA export from nucleus;N-terminal protein myristoylation;protein import into nucleus;photomorphogenesis;embryo development ending in seed dormancy;seed germination;flower development;regulation of flower development;meristem structural organization;meristem initiation;seed dormancy process;sugar mediated signaling pathway;vegetative to reproductive phase transition of m…	nuclear pore;cytosol	tRNA binding;nucleobase-containing compound transmembrane transporter activity
529	AT3G29320	no_paralog	PHS1	2.08	HS-LC:1.00	1/35	CdMEKK9/CdMEKK10	response to temperature stimulus;response to cold;response to water deprivation;starch biosynthetic process;defense response to bacterium	chloroplast;plastid;chloroplast stroma	phosphorylase activity;transferase activity, transferring glycosyl groups
530	AT1G03760	no_paralog	na	2.07	HS-LC:1.00	1/35	CdMEKK9/CdMEKK10	protein folding;embryo sac egg cell differentiation;photoperiodism, flowering	nucleus;prefoldin complex	na
531	AT4G22670	no_paralog	TPR11	2.07	HS-LC:1.00	1/35	CdMEKK9/CdMEKK10	response to cadmium ion	cytoplasm;cytosol	na
532	AT4G13780	no_paralog	na	2.07	HS-LC:1.00	1/35	CdMEKK9/CdMEKK10	methionyl-tRNA aminoacylation;response to cadmium ion	cytoplasm;cytosol	methionine-tRNA ligase activity
533	AT2G25180	AT4G31920	RR12	2.07	AT-CX:1.00	1/35	CdRAF15/CdRAF25	response to cytokinin;cytokinin-activated signaling pathway;regulation of root meristem growth;regulation of chlorophyll biosynthetic process;regulation of anthocyanin metabolic process;root development;shoot system development;cellular response to cytokinin stimulus;primary root development;regulation of seed growth	nucleus	phosphorelay response regulator activity;sequence-specific DNA binding transcription factor activity
534	AT5G11110	no_paralog	SPSA2	2.07	AT-CX:1.00	1/35	CdRAF3	response to hypoxia;pollen wall assembly;galactolipid biosynthetic process	nucleus;plasma membrane	sucrose-phosphate synthase activity
535	AT1G71410	AT1G22870	na	2.07	HS-CX:1.00	1/35	CdMEKK9/CdMEKK10	na	cytoplasm;membrane	kinase activity
536	AT5G26860	AT3G05790	LON_ARA_ARA	2.07	HS-LC:1.00	1/35	CdMEKK9/CdMEKK10	karyogamy;response to hypoxia;ATP catabolic process;misfolded or incompletely synthesized protein catabolic process;mitochondrion organization;embryo sac egg cell differentiation;cellular response to oxidative stress;chaperone-mediated protein complex assembly;protein homooligomerization;oxidation-dependent protein catabolic process	mitochondrion;cytosol;mitochondrial nucleoid	single-stranded DNA binding;single-stranded RNA binding;ATP-dependent peptidase activity;serine-type endopeptidase activity;protein binding;ATP binding;serine-type peptidase activity;mitochondrial light strand promoter anti-sense binding
537	AT5G23290	no_paralog	PFD5	2.07	HS-LC:1.00	1/35	CdMEKK9/CdMEKK10	protein folding	cytoplasm;cytosol;prefoldin complex	na
538	AT4G25590	AT5G52360	ADF7	2.07	HS-LC:1.00	1/35	CdMEKK9/CdMEKK10	na	intracellular;nucleus;actin filament	na
539	AT3G05060	AT5G27120	na	2.07	AT-CX:1.00	1/35	CdMEKK13	RNA methylation;purine nucleotide biosynthetic process;nucleotide biosynthetic process;pyrimidine ribonucleotide biosynthetic process	nucleus;nucleolus;membrane	DNA binding
540	AT1G44110	no_paralog	CYCA1;1	2.07	AT-CX:1.00	1/35	CdMEKK13	cytokinesis by cell plate formation;DNA replication;DNA replication initiation;regulation of DNA replication;DNA methylation;cell proliferation;regulation of flower development;stomatal complex morphogenesis;regulation of G2/M transition of mitotic cell cycle;response to cyclopentenone;gene silencing;histone phosphorylation;histone lysine methylation;regulation of cell proliferation;histone H3-K9…	nucleus;cytoplasm	protein binding;cyclin-dependent protein serine/threonine kinase regulator activity
541	AT1G60960	AT1G10970	IRT3	2.06	AT-CX:1.00	1/35	CdRAF5	cation transport;iron ion transport;zinc ion transport;water transport;response to nematode;cellular response to iron ion starvation;metal ion transport	vacuolar membrane;plasma membrane;chloroplast;membrane	iron ion transmembrane transporter activity;zinc ion transmembrane transporter activity;cation transmembrane transporter activity;metal ion transmembrane transporter activity
542	AT1G61400	no_paralog	na	2.06	AT-PG:1.00	1/35	CdZIK3	na	plasma membrane	kinase activity;carbohydrate binding
543	AT4G10320	no_paralog	na	2.06	HS-LC:1.00	1/35	CdMEKK9/CdMEKK10	gluconeogenesis;glycolytic process;tRNA aminoacylation for protein translation;cytoskeleton organization;response to salt stress;proteasomal protein catabolic process;response to cadmium ion	cytoplasm;cytosol	aminoacyl-tRNA ligase activity;ATP binding
544	AT1G42470	no_paralog	na	2.06	AT-CX:1.00	1/35	CdMEKK3/CdMEKK5	na	plasma membrane;plasmodesma;membrane	hedgehog receptor activity
545	AT5G03160	no_paralog	P58IPK	2.06	HS-LC:1.00	1/35	CdMEKK9/CdMEKK10	protein folding;response to heat;response to high light intensity;response to endoplasmic reticulum stress;response to hydrogen peroxide	endoplasmic reticulum;endoplasmic reticulum lumen;plasma membrane	na
546	AT4G01090	AT1G01440	na	2.06	AT-HT:1.00	1/35	CdRAF11/CdRAF22/CdRAF34	oligopeptide transport	nucleus	protein binding
547	AT3G56580	no_paralog	RZF1	2.05	HS-LC:1.00	1/35	CdMEKK9/CdMEKK10	response to water deprivation;negative regulation of proline biosynthetic process	na	ubiquitin-protein ligase activity;zinc ion binding
548	AT5G52360	AT4G25590	ADF10	2.05	HS-LC:1.00	1/35	CdMEKK9/CdMEKK10	na	intracellular;nucleus;actin filament;apoplast	na
549	AT1G26660	no_paralog	na	2.05	HS-LC:1.00	1/35	CdMEKK9/CdMEKK10	mitotic recombination;protein folding;embryo sac egg cell differentiation	cytoplasm;prefoldin complex	na
550	AT4G23570	AT4G11260	SGT1A	2.05	HS-LC:1.00	1/35	CdMEKK9/CdMEKK10	ubiquitin-dependent protein catabolic process;defense response;cellular response to auxin stimulus;regulation of defense response to fungus, incompatible interaction	nucleus;SCF ubiquitin ligase complex	protein binding
551	AT5G62550	no_paralog	na	2.05	AT-CX:1.00	1/35	CdMEKK13	na	plasma membrane;chloroplast	na
552	AT1G71790	no_paralog	CPB	2.05	HS-LC:1.00	1/35	CdMEKK9/CdMEKK10	actin filament organization;response to heat;actin cytoskeleton organization;actin filament capping	F-actin capping protein complex	na
553	AT4G34200	no_paralog	EDA9	2.05	HS-LC:1.00	1/35	CdMEKK9/CdMEKK10	megagametogenesis	mitochondrion;chloroplast;plastid;chloroplast stroma;membrane	ATP binding
554	AT4G31250	no_paralog	na	2.05	AT-PG:1.00	1/35	CdRAF21	protein phosphorylation;transmembrane receptor protein tyrosine kinase signaling pathway	extracellular region	protein serine/threonine kinase activity;ATP binding;kinase activity
555	AT4G34460	no_paralog	ELK4	2.04	HS-LC:1.00	1/35	CdMEKK9/CdMEKK10	MAPK cascade;regulation of transcription, DNA-templated;protein targeting to membrane;cell communication;response to cold;response to bacterium;response to ethylene;response to abscisic acid;abscisic acid-activated signaling pathway;negative regulation of abscisic acid-activated signaling pathway;defense response to fungus, incompatible interaction;seed germination;systemic acquired resistance, s…	cytoplasm;endoplasmic reticulum;heterotrimeric G-protein complex;plasma membrane;Cul4-RING ubiquitin ligase complex	nucleotide binding;GTPase activity;protein binding
556	AT5G48030	no_paralog	GFA2	2.04	HS-LC:1.00	1/35	CdMEKK9/CdMEKK10	nuclear membrane fusion;karyogamy;protein folding;embryo sac development;embryo sac cellularization;embryo sac egg cell differentiation;polar nucleus fusion;synergid death;chaperone mediated protein folding requiring cofactor	mitochondrion	na
557	AT1G53700	AT3G14370	WAG1	2.03	AT-PG:1.00	1/35	CdZIK1	auxin polar transport;root development;cotyledon development	nucleus	protein serine/threonine kinase activity;kinase activity
558	AT2G47600	no_paralog	MHX1	2.03	AT-CX:1.00	1/35	CdRAF21	cation transport;iron ion transport;zinc ion transport;magnesium ion transport;sodium ion transmembrane transport	vacuolar membrane	calcium:sodium antiporter activity;cation:cation antiporter activity
559	AT1G14080	AT2G03220	FUT6	2.03	AT-CX:1.00	1/35	CdRAF12	na	Golgi apparatus	fucosyltransferase activity;transferase activity, transferring glycosyl groups
560	AT1G79670	no_paralog	WAKL22	2.03	AT-PG:1.00	1/35	CdMEKK3/CdMEKK5	response to fungus	cell wall	kinase activity
561	AT2G26300	no_paralog	GPA1	2.03	HS-LC:1.00	1/35	CdMEKK9/CdMEKK10	mitotic cell cycle;response to superoxide;G-protein coupled receptor signaling pathway, coupled to S1P second messenger;RNA processing;tyrosine biosynthetic process;signal transduction;G-protein coupled receptor signaling pathway;adenylate cyclase-modulating G-protein coupled receptor signaling pathway;cell death;L-phenylalanine biosynthetic process;abscisic acid-activated signaling pathway;gibbe…	cytoplasm;endoplasmic reticulum membrane;heterotrimeric G-protein complex;plasma membrane;plasmodesma;extrinsic component of cytoplasmic side of plasma membrane	G-protein coupled receptor binding;GTPase activity;signal transducer activity;GTPase inhibitor activity;protein binding;GTP binding;channel regulator activity;G-protein beta/gamma-subunit complex binding;GTPase binding
562	AT5G65010	AT5G10240	ASN2	2.03	AT-CX:1.00	1/35	CdMEKK13	asparagine biosynthetic process;cysteine biosynthetic process;hyperosmotic salinity response;ammonium ion metabolic process	cytoplasm;cytosol;plasmodesma	asparagine synthase (glutamine-hydrolyzing) activity;aspartate-ammonia ligase activity
563	AT1G56440	no_paralog	TPR5	2.03	HS-LC:1.00	1/35	CdMEKK9/CdMEKK10	na	cytoplasm	na
564	AT1G16350	AT1G79470	na	2.03	AT-CX:1.00	1/35	CdMEKK13	RNA splicing, via endonucleolytic cleavage and ligation;GMP biosynthetic process;methionine biosynthetic process	cytosol	IMP dehydrogenase activity
565	AT5G47930	no_paralog	na	2.03	HS-LC:1.00	1/35	CdMEKK9/CdMEKK10	translation;ribosome biogenesis	cytoplasm;ribosome;plasma membrane;cytosolic ribosome;cytosolic small ribosomal subunit	structural constituent of ribosome
566	AT1G55900	no_paralog	TIM50	2.02	HS-LC:1.00	1/35	CdMEKK9/CdMEKK10	protein targeting to mitochondrion;pyrimidine ribonucleotide biosynthetic process;photomorphogenesis;embryo development ending in seed dormancy;photorespiration;cullin deneddylation	mitochondrion;mitochondrial inner membrane	na
567	AT5G63640	no_paralog	na	2.02	AT-CX:1.00	1/35	CdRAF15/CdRAF25	intracellular protein transport;intra-Golgi vesicle-mediated transport	nucleus;Golgi stack;plasma membrane	protein transporter activity
568	AT3G11230	no_paralog	na	2.02	AT-CX:1.00	1/35	CdRAF5	na	nucleus	na
569	AT5G25530	no_paralog	na	2.02	HS-LC:1.00	1/35	CdMEKK9/CdMEKK10	protein folding	cytoplasm	na
570	AT2G07340	no_paralog	PFD1	2.02	HS-LC:1.00	1/35	CdMEKK9/CdMEKK10	na	cytoplasm;cytosol	na
571	AT1G72160	no_paralog	na	2.02	AT-CX:1.00	1/35	CdRAF15/CdRAF25	transport	nucleus;plasma membrane	transporter activity
572	AT1G04820	no_paralog	TUA4	2.02	HS-LC:1.00	1/35	CdMEKK9/CdMEKK10	acetyl-CoA metabolic process;gluconeogenesis;cytoskeleton organization;microtubule-based process;proteasomal protein catabolic process;response to cadmium ion;cellular response to gravity	cell wall;cytoplasm;vacuolar membrane;cytosol;plasma membrane;chloroplast;chloroplast stroma;tubulin complex	structural constituent of cytoskeleton
573	AT1G50010	no_paralog	TUA2	2.02	HS-LC:1.00	1/35	CdMEKK9/CdMEKK10	microtubule-based process;response to salt stress	cell wall;cytoplasm;cytosol;membrane;tubulin complex	structural constituent of cytoskeleton
574	AT1G69220	no_paralog	SIK1	2.01	HS-CX:1.00	1/35	CdMEKK9/CdMEKK10	na	chromosome, centromeric region;nucleus;chromosome;cytoplasm;mitochondrion	kinase activity
575	AT5G53170	no_paralog	FTSH11	2.01	AT-CX:1.00	1/35	CdZIK1	response to heat;PSII associated light-harvesting complex II catabolic process;glucosinolate biosynthetic process;regulation of protein localization	mitochondrion;chloroplast;plastid;chloroplast envelope	ATP-dependent peptidase activity;metallopeptidase activity;ATPase activity
576	ATMG00400	no_paralog	ORF157	2.01	AT-CX:1.00	1/35	CdZIK3	na	na	na
577	AT4G14960	no_paralog	TUA6	2.01	HS-LC:1.00	1/35	CdMEKK9/CdMEKK10	microtubule cytoskeleton organization;cell morphogenesis;gluconeogenesis;cytoskeleton organization;response to salt stress;proteasomal protein catabolic process;cell growth;Golgi vesicle transport;cellular response to gravity	cell wall;nucleolus;cytoplasm;vacuole;cytosol;microtubule;plasma membrane;plasmodesma;membrane;tubulin complex	structural constituent of cytoskeleton;protein binding
578	AT1G64740	no_paralog	TUA1	2	AT-CX:1.00	1/35	CdMEKK3/CdMEKK5	gluconeogenesis;cytoskeleton organization;microtubule-based process;proteasomal protein catabolic process	cytoplasm;cytosol;plasma membrane;microtubule cytoskeleton	structural constituent of cytoskeleton
579	AT1G03160	no_paralog	FZL	2	AT-CX:1.00	1/35	CdMEKK3/CdMEKK5	rRNA processing;embryo development ending in seed dormancy;chloroplast relocation;thylakoid membrane organization;photosystem II assembly;vegetative to reproductive phase transition of meristem;photosynthesis;iron-sulfur cluster assembly;ncRNA metabolic process;regulation of protein dephosphorylation;transcription from plastid promoter;positive regulation of transcription, DNA-templated;ovule dev…	chloroplast;chloroplast membrane	na
580	AT2G32800	no_paralog	AP4.3A	2	AT-PG:1.00	1/35	CdMEKK7	protein phosphorylation	plasma membrane	protein kinase activity;ATP binding
581	AT1G30120	AT2G34590	PDH-E1 BETA	2	AT-CX:1.00	1/35	CdRAF19	acetyl-CoA metabolic process;polyamine catabolic process;fatty acid biosynthetic process;response to wounding;phenylpropanoid metabolic process;coumarin biosynthetic process;sterol biosynthetic process;brassinosteroid biosynthetic process;cellular modified amino acid biosynthetic process	chloroplast;chloroplast stroma;chloroplast envelope;plastid pyruvate dehydrogenase complex	pyruvate dehydrogenase (acetyl-transferring) activity
582	AT5G12090	no_paralog	na	1.99	AT-PG:1.00	1/35	CdZIK4	na	nucleus	kinase activity
583	AT3G01720	no_paralog	na	1.99	AT-CX:1.00	1/35	CdZIK1	calcium ion transport;Golgi organization;response to salt stress;response to sucrose;response to glucose;response to fructose	na	transferase activity, transferring glycosyl groups
584	AT1G32340	no_paralog	NHL8	1.98	AT-CX:1.00	1/35	CdRAF13	protein N-linked glycosylation;N-terminal protein myristoylation;response to symbiotic fungus	nucleus	na
585	AT2G21790	no_paralog	RNR1	1.98	AT-CX:1.00	1/35	CdMEKK13	gluconeogenesis;DNA replication;DNA-dependent DNA replication;cytoskeleton organization;nucleotide biosynthetic process;deoxyribonucleoside triphosphate biosynthetic process;proteasomal protein catabolic process;response to cadmium ion	cytoplasm;ribonucleoside-diphosphate reductase complex	ribonucleoside-diphosphate reductase activity, thioredoxin disulfide as acceptor
586	AT1G77450	no_paralog	NAC032	1.97	AT-CX:1.00	1/35	CdRAF3	multicellular organismal development;toxin catabolic process;response to cyclopentenone	nucleus	sequence-specific DNA binding transcription factor activity
587	AT1G50020	no_paralog	na	1.97	AT-CX:1.00	1/35	CdRAF38	na	chloroplast;chloroplast thylakoid membrane	na
588	AT1G80380	no_paralog	na	1.97	AT-CX:1.00	1/35	CdRAF16/CdRAF30/CdRAF33	photorespiration	nucleus;chloroplast;chloroplast stroma;chloroplast envelope	glycerate kinase activity
589	AT3G08580	no_paralog	AAC1	1.97	HS-LC:1.00	1/35	CdMEKK9/CdMEKK10	gluconeogenesis;ubiquitin-dependent protein catabolic process;transport;cytoskeleton organization;photorespiration;proteasomal protein catabolic process;purine nucleotide transport;response to misfolded protein;proteasome core complex assembly	cell wall;nucleolus;mitochondrion;mitochondrial envelope;mitochondrial inner membrane;vacuole;vacuolar membrane;plasma membrane;chloroplast;chloroplast envelope;membrane	ATP:ADP antiporter activity;copper ion binding
590	AT5G13490	no_paralog	AAC2	1.97	HS-LC:1.00	1/35	CdMEKK9/CdMEKK10	gluconeogenesis;protein targeting to membrane;transport;anion transport;nucleotide transport;amino acid transport;ER to Golgi vesicle-mediated transport;cytoskeleton organization;regulation of plant-type hypersensitive response;proteasomal protein catabolic process;ammonium transport;basic amino acid transport;purine nucleotide transport;negative regulation of programmed cell death;amino acid imp…	mitochondrion;mitochondrial envelope;mitochondrial inner membrane;vacuolar membrane;chloroplast;chloroplast envelope;membrane	ATP:ADP antiporter activity;copper ion binding;protein binding
591	AT3G13750	no_paralog	BGAL1	1.96	AT-CX:1.00	1/35	CdRAF16/CdRAF30/CdRAF33	regulation of protein localization;hydrogen peroxide catabolic process;root hair elongation	extracellular region;cell wall;plant-type cell wall;plasmodesma	beta-galactosidase activity
592	AT3G05520	no_paralog	CPA	1.96	HS-LC:1.00	1/35	CdMEKK9/CdMEKK10	actin filament organization;actin cytoskeleton organization;actin filament-based movement;Golgi localization;mitochondrion localization;actin filament capping;peroxisome localization	nucleus;cytoplasm;F-actin capping protein complex	actin binding
593	AT5G63840	no_paralog	RSW3	1.96	AT-CX:1.00	1/35	CdRAF19	unidimensional cell growth;cellulose biosynthetic process;defense response to bacterium;response to cadmium ion;Golgi vesicle transport	extracellular region;endoplasmic reticulum;chloroplast	hydrolase activity, hydrolyzing O-glycosyl compounds;glucosidase activity
594	AT1G03840	AT5G44160	MGP	1.96	HS-LC:1.00	1/35	CdRAF8	regulation of transcription, DNA-templated	nucleus	nucleic acid binding;sequence-specific DNA binding transcription factor activity;protein binding;zinc ion binding
595	AT1G49240	AT3G18780	FIZ1	1.95	HS-LC:1.00	1/35	CdRAF11/CdRAF22/CdRAF34	cell morphogenesis;gluconeogenesis;response to osmotic stress;cytoskeleton organization;response to salt stress;proteasomal protein catabolic process;cell growth;response to cadmium ion;Golgi vesicle transport;root hair cell tip growth	cytoplasm;vacuole;cytosol;plasma membrane;plasmodesma;chloroplast;chloroplast stroma;chloroplast envelope	structural constituent of cytoskeleton;copper ion binding
596	AT1G29730	no_paralog	na	1.95	AT-PG:1.00	1/35	CdZIK3	na	plasma membrane	protein serine/threonine kinase activity;kinase activity
597	AT5G66230	AT3G51230	na	1.95	AT-CX:1.00	1/35	CdMEKK13	cell proliferation;petal formation;sepal formation	chloroplast	na
598	AT5G07070	no_paralog	SnRK3.2	1.95	AT-PG:1.00	1/35	CdZIK3	stomatal movement;calcium-mediated signaling	plasma membrane	protein binding;kinase activity
599	AT2G35260	no_paralog	na	1.95	AT-CX:1.00	1/35	CdRAF12	na	chloroplast	na
600	AT2G32450	AT1G05150	na	1.95	AT-CX:1.00	1/35	CdRAF13	na	nucleus;plasma membrane	calcium ion binding;transferase activity, transferring glycosyl groups
601	AT3G13380	AT1G55610	BRL3	1.94	AT-PG:1.00	1/35	CdZIK3	response to molecule of bacterial origin;ER to Golgi vesicle-mediated transport;signal transduction;stomatal complex morphogenesis;amino acid import;stamen development	plasma membrane	protein kinase activity
602	AT4G24560	no_paralog	UBP16	1.94	AT-CX:1.00	1/35	CdZIK4	nuclear-transcribed mRNA catabolic process;protein glycosylation;protein N-linked glycosylation;cell proliferation;response to salt stress;flower development;protein deubiquitination;root development;leaf development;shoot system development;regulation of response to salt stress	extracellular region	ubiquitin thiolesterase activity;ubiquitin-specific protease activity;protein binding
603	AT2G26680	no_paralog	na	1.94	AT-CX:1.00	1/35	CdZIK1	na	Golgi apparatus;plasma membrane	na
604	AT4G39050	AT2G21380	na	1.94	AT-HT:1.00	1/35	CdRAF11/CdRAF22/CdRAF34	regulation of defense response	chloroplast	microtubule motor activity
605	AT3G18780	AT1G49240	LSR2	1.94	HS-LC:1.00	1/35	CdRAF11/CdRAF22/CdRAF34	polysaccharide biosynthetic process;cell morphogenesis;gluconeogenesis;calcium ion transport;water transport;response to osmotic stress;cytoskeleton organization;Golgi organization;vacuole organization;response to high light intensity;response to salt stress;response to cytokinin;response to fructose;multidimensional cell growth;cell tip growth;root epidermal cell differentiation;response to red …	nucleus;cytoplasm;membrane	structural constituent of cytoskeleton;protein binding
606	AT1G78710	no_paralog	TBL42	1.94	AT-CX:1.00	1/35	CdRAF12	na	extracellular region	na
607	AT5G35970	no_paralog	na	1.93	AT-CX:1.00	1/35	CdRAF3	chlorophyll catabolic process	chloroplast;chloroplast stroma;chloroplast envelope	DNA binding
608	AT1G33280	no_paralog	NAC015	1.93	AT-CX:1.00	1/35	CdRAF20/CdRAF27	multicellular organismal development;secondary cell wall biogenesis;positive regulation of gene expression;positive regulation of transcription, DNA-templated;root cap development	nucleus	sequence-specific DNA binding transcription factor activity
609	AT1G53500	AT3G14790	RHM2	1.93	AT-CX:1.00	1/35	CdRAF13	metabolic process;mucilage biosynthetic process;seed coat development;UDP-rhamnose biosynthetic process	cytosol	catalytic activity;UDP-L-rhamnose synthase activity;UDP-4-keto-6-deoxy-glucose-3,5-epimerase activity;UDP-4-keto-rhamnose-4-keto-reductase activity;UDP-glucose 4,6-dehydratase activity
610	AT5G58830	no_paralog	na	1.91	AT-CX:1.00	1/35	CdRAF12	proteolysis;metabolic process	extracellular region;cell wall	serine-type endopeptidase activity
611	AT5G04820	no_paralog	OFP13	1.91	AT-CX:1.00	1/35	CdRAF36	negative regulation of transcription, DNA-templated	nucleus	na
612	AT5G24840	no_paralog	na	1.91	AT-CX:1.00	1/35	CdMEKK13	protein targeting to mitochondrion;nucleotide biosynthetic process	nucleus	na
613	AT4G10390	AT1G33260	na	1.91	AT-PG:1.00	1/35	CdZIK1	response to wounding;response to fungus;jasmonic acid biosynthetic process;response to jasmonic acid	nucleus	kinase activity
614	AT1G72670	AT1G17480	iqd8	1.91	AT-CX:1.00	1/35	CdMEKK13	microtubule cytoskeleton organization;cytokinesis by cell plate formation	cytoplasm	calmodulin binding
615	AT4G25630	AT5G52470	FIB2	1.91	AT-CX:1.00	1/35	CdMEKK13	RNA methylation;purine nucleotide biosynthetic process;rRNA processing;nucleotide biosynthetic process;pyrimidine ribonucleotide biosynthetic process	nucleus;nucleolus;mediator complex	RNA binding;snoRNA binding
616	AT4G32840	no_paralog	PFK6	1.91	HS-LC:1.00	1/35	CdMEKK9/CdMEKK10	glycolytic process	cytoplasm;cytosol;6-phosphofructokinase complex	6-phosphofructokinase activity
617	AT3G18810	no_paralog	PERK6	1.91	AT-PG:1.00	1/35	CdZIK3	protein phosphorylation;regulation of unidimensional cell growth	plasma membrane	protein kinase activity;ATP binding
618	AT1G20620	no_paralog	SEN2	1.91	AT-CX:1.00	1/35	CdRAF16/CdRAF30/CdRAF33	cellular response to nitrogen starvation;response to cold;response to light stimulus;systemic acquired resistance;photorespiration;cellular response to sulfate starvation;cellular response to phosphate starvation;regulation of defense response;hydrogen peroxide catabolic process;cellular lipid catabolic process;response to cadmium ion	cell wall;nucleus;mitochondrion;vacuole;peroxisome;plasma membrane;plasmodesma;chloroplast;chloroplast stroma;chloroplast envelope;membrane;cytosolic ribosome;apoplast	catalase activity;cobalt ion binding
619	AT1G63660	no_paralog	na	1.9	AT-CX:1.00	1/35	CdMEKK13	RNA methylation;protein import into nucleus;pyrimidine ribonucleotide biosynthetic process	cytoplasm;cytosol	GMP synthase (glutamine-hydrolyzing) activity
620	AT5G15190	no_paralog	na	1.9	AT-CX:1.00	1/35	CdRAF3	na	mitochondrion;chloroplast	na
621	AT3G05460	no_paralog	na	1.9	AT-CX:1.00	1/35	CdRAF12	na	extracellular region	na
622	AT2G41110	no_paralog	CAM2	1.89	AT-CX:1.00	1/35	CdMEKK9/CdMEKK10	pollen germination;protein catabolic process	cytoplasm	calcium ion binding;protein binding
623	AT5G06940	no_paralog	na	1.89	AT-PG:1.00	1/35	CdZIK2	na	extracellular region	kinase activity
624	AT5G01700	no_paralog	na	1.89	AT-CX:1.00	1/35	CdZIK1	na	nucleus	protein serine/threonine phosphatase activity
625	AT5G03470	AT3G09880	ATB' ALPHA	1.89	HS-LC:1.00	1/35	CdMEKK9/CdMEKK10	signal transduction;regulation of phosphorylation	protein phosphatase type 2A complex;nucleus	protein phosphatase type 2A regulator activity
626	AT4G11260	AT4G23570	SGT1B	1.89	HS-LC:1.00	1/35	CdMEKK9/CdMEKK10	MAPK cascade;ubiquitin-dependent protein catabolic process;protein targeting to membrane;response to heat;detection of biotic stimulus;salicylic acid biosynthetic process;auxin-activated signaling pathway;photorespiration;systemic acquired resistance, salicylic acid mediated signaling pathway;salicylic acid mediated signaling pathway;jasmonic acid mediated signaling pathway;negative regulation of…	nucleus;cytoplasm;cytosol;SCF ubiquitin ligase complex	protein binding
627	AT1G07930	no_paralog	na	1.89	HS-LC:1.00	1/35	CdMEKK9/CdMEKK10	na	cytoplasm;mitochondrion;vacuole;plasmodesma	translation elongation factor activity;calmodulin binding
628	AT5G60390	AT1G07920	na	1.89	HS-LC:1.00	1/35	CdMEKK9/CdMEKK10	na	nucleus;cytoplasm;mitochondrion;vacuole;plasma membrane;plasmodesma	translation elongation factor activity;calmodulin binding
629	AT1G07940	no_paralog	na	1.89	HS-LC:1.00	1/35	CdMEKK9/CdMEKK10	na	cytoplasm;mitochondrion;plasma membrane;plasmodesma	translation elongation factor activity;calmodulin binding
630	AT1G07920	AT5G60390	na	1.89	HS-LC:1.00	1/35	CdMEKK9/CdMEKK10	response to cadmium ion	nucleolus;cytoplasm;mitochondrion;vacuolar membrane;cytosol;plasma membrane;plasmodesma;chloroplast;membrane	translation elongation factor activity;calmodulin binding
631	AT4G01610	AT1G02300	na	1.89	AT-CX:1.00	1/35	CdRAF15/CdRAF25	cell morphogenesis;proteolysis;fatty acid beta-oxidation;seed dormancy process;cell growth;Golgi vesicle transport	extracellular region;vacuole;cytosol	cysteine-type peptidase activity
632	AT3G61110	no_paralog	RS27A	1.88	HS-LC:1.00	1/35	CdMEKK9/CdMEKK10	RNA methylation;translation;plant-type cell wall organization;ribosome biogenesis;cell wall modification	cell wall;cytoplasm;ribosome;plasmodesma;cytosolic ribosome;cytosolic small ribosomal subunit	structural constituent of ribosome
633	AT1G08940	no_paralog	na	1.88	AT-CX:1.00	1/35	CdZIK4	protein targeting to membrane;metabolic process;toxin catabolic process;positive regulation of flavonoid biosynthetic process;regulation of plant-type hypersensitive response;response to cyclopentenone	na	catalytic activity
634	AT3G54560	no_paralog	HTA11	1.88	AT-CX:1.00	1/35	CdMEKK13	chromatin remodeling;flower development;regulation of flower development;regulation of gene expression;detection of temperature stimulus;defense response to bacterium;regulation of DNA methylation	nucleus	DNA binding;protein binding
635	AT3G19480	no_paralog	na	1.87	HS-LC:1.00	1/35	CdMEKK9/CdMEKK10	na	mitochondrion;chloroplast;chloroplast stroma	na
636	AT1G05790	no_paralog	na	1.87	AT-CX:1.00	1/35	CdRAF36	lipid metabolic process;fatty acid beta-oxidation;protein import into peroxisome matrix	plasma membrane	triglyceride lipase activity
637	AT2G39540	no_paralog	na	1.87	AT-CX:1.00	1/35	CdRAF12	response to gibberellin	extracellular region	na
638	AT5G59870	no_paralog	HTA6	1.87	AT-CX:1.00	1/35	CdMEKK13	cell proliferation	nucleus;nucleolus;plasmodesma	DNA binding
639	AT5G56740	no_paralog	HAG2	1.87	AT-CX:1.00	1/35	CdMEKK13	DNA-dependent DNA replication;regulation of flower development;histone modification;floral organ formation	nucleus;cytosol	histone acetyltransferase activity;H4 histone acetyltransferase activity
640	AT4G02725	no_paralog	na	1.87	AT-HT:1.00	1/35	CdZIK2	na	chloroplast;membrane	na
641	AT3G48530	no_paralog	KING1	1.87	AT-CX:1.00	1/35	CdRAF16/CdRAF30/CdRAF33	na	plant-type cell wall	na
642	AT3G22780	AT4G14770	TSO1	1.86	AT-CX:1.00	1/35	CdRAF19	microtubule cytoskeleton organization;cytokinesis by cell plate formation;DNA replication;DNA methylation;DNA recombination;methylation-dependent chromatin silencing;microtubule nucleation;meiotic nuclear division;cell proliferation;asymmetric cell division;regulation of flower development;regulation of meristem structural organization;response to gamma radiation;gene silencing;histone modificati…	nucleus	sequence-specific DNA binding transcription factor activity
643	AT3G27640	no_paralog	na	1.86	AT-CX:1.00	1/35	CdMEKK13	DNA-dependent DNA replication	nucleus;Cul4-RING ubiquitin ligase complex	nucleotide binding
644	AT4G15090	no_paralog	FAR1	1.85	AT-CX:1.00	1/35	CdRAF5	mitotic cell cycle;double-strand break repair via homologous recombination;RNA processing;response to xenobiotic stimulus;gravitropism;response to red or far red light;photomorphogenesis;red or far-red light signaling pathway;far-red light signaling pathway;response to ionizing radiation;response to far red light;cullin deneddylation;protein ubiquitination;histone methylation;protein deubiquitina…	nucleus	sequence-specific DNA binding transcription factor activity;protein binding
645	AT3G48020	no_paralog	na	1.85	AT-CX:1.00	1/35	CdRAF3	na	nucleus	na
646	AT2G23380	no_paralog	SET1	1.85	HS-LC:1.00	1/35	CdRAF8	DNA methylation;regulation of gene expression by genetic imprinting;DNA mediated transformation;leaf morphogenesis;vernalization response;vegetative to reproductive phase transition of meristem;histone methylation;gene silencing by RNA;negative regulation of molecular function, epigenetic;histone H3-K9 methylation	nucleus	sequence-specific DNA binding transcription factor activity;single-stranded RNA binding;protein binding
647	AT4G14050	no_paralog	na	1.85	AT-CX:1.00	1/35	CdZIK1	na	mitochondrion;membrane	na
648	AT2G45710	no_paralog	na	1.84	HS-LC:1.00	1/35	CdMEKK9/CdMEKK10	RNA methylation;translation;ribosome biogenesis	nucleolus;cytoplasm;cytosol;ribosome;plasma membrane;plasmodesma;cytosolic ribosome;cytosolic small ribosomal subunit	structural constituent of ribosome
649	AT1G11660	no_paralog	na	1.84	HS-LC:1.00	1/35	CdMEKK9/CdMEKK10	protein folding	nucleus	na
650	AT1G17745	no_paralog	PGDH	1.84	HS-LC:1.00	1/35	CdMEKK9/CdMEKK10	L-serine biosynthetic process;tryptophan catabolic process;protein targeting to membrane;indoleacetic acid biosynthetic process;positive regulation of flavonoid biosynthetic process;regulation of plant-type hypersensitive response;defense response to bacterium	nucleus;cytosol;chloroplast;chloroplast stroma	phosphoglycerate dehydrogenase activity;protein binding
651	AT4G28310	no_paralog	na	1.84	AT-CX:1.00	1/35	CdMEKK13	na	nucleus	na
652	AT3G13100	no_paralog	MRP7	1.84	AT-CX:1.00	1/35	CdRAF11/CdRAF22/CdRAF34	systemic acquired resistance;salicylic acid biosynthetic process;response to other organism	vacuolar membrane	ATPase activity, coupled to transmembrane movement of substances
653	AT4G16760	no_paralog	ATACX1	1.83	AT-CX:1.00	1/35	CdRAF5	long-chain fatty acid metabolic process;defense response to insect;protein targeting to membrane;fatty acid biosynthetic process;fatty acid beta-oxidation;pollen development;response to wounding;response to fungus;jasmonic acid biosynthetic process;response to jasmonic acid;salicylic acid mediated signaling pathway;regulation of plant-type hypersensitive response;negative regulation of programmed…	cytoplasm;peroxisome;plasmodesma	acyl-CoA oxidase activity
654	AT4G34970	AT2G16700	ADF9	1.83	HS-LC:1.00	1/35	CdMEKK9/CdMEKK10	response to sucrose;response to fructose;actin filament polymerization	intracellular;cytoplasm	na
655	AT4G23210	no_paralog	CRK13	1.83	AT-PG:1.00	1/35	CdMEKK11/CdMEKK12	response to molecule of bacterial origin;respiratory burst involved in defense response;amino acid transport;plant-type hypersensitive response;response to chitin;defense response to bacterium	extracellular region	kinase activity
656	AT2G15320	no_paralog	na	1.83	AT-CX:1.00	1/35	CdRAF21	signal transduction	plasma membrane	na
657	AT4G02750	no_paralog	na	1.82	AT-CX:1.00	1/35	CdRAF2/CdRAF4	na	mitochondrion	na
658	AT2G16700	AT4G34970	ATADF5	1.82	HS-LC:1.00	1/35	CdMEKK9/CdMEKK10	na	intracellular;cytoplasm	na
659	AT2G47500	no_paralog	na	1.82	AT-CX:1.00	1/35	CdRAF15/CdRAF25	na	cytoplasm	microtubule motor activity
660	AT3G16270	no_paralog	na	1.82	AT-CX:1.00	1/35	CdZIK1	cell morphogenesis;protein targeting to vacuole;cell growth;vesicle-mediated transport;Golgi vesicle transport	nucleus;membrane	na
661	AT2G17130	AT4G35260	IDH2	1.82	AT-CX:1.00	1/35	CdRAF13	tricarboxylic acid cycle;isocitrate metabolic process;Golgi organization;vacuole organization;metabolic process;photorespiration	mitochondrion	isocitrate dehydrogenase (NAD+) activity
662	AT4G35310	AT2G17290	CPK5	1.82	AT-CX:1.00	1/35	CdZIK1	protein phosphorylation;response to abscisic acid;root hair elongation	nucleus;cytosol;plasma membrane;membrane	calmodulin-dependent protein kinase activity;kinase activity
663	AT5G59740	AT3G46180	na	1.82	AT-CX:1.00	1/35	CdMEKK13	sister chromatid cohesion;chromatin silencing by small RNA;meiotic chromosome segregation	na	galactose transmembrane transporter activity
664	AT3G45990	no_paralog	na	1.82	HS-LC:1.00	1/35	CdMEKK9/CdMEKK10	na	intracellular	na
665	AT3G13910	no_paralog	na	1.81	AT-CX:1.00	1/35	CdRAF13	na	nucleus;plasma membrane	na
666	AT1G28440	no_paralog	HSL1	1.81	AT-PG:1.00	1/35	CdMEKK3/CdMEKK5	polysaccharide biosynthetic process;protein phosphorylation;microtubule nucleation;transmembrane receptor protein tyrosine kinase signaling pathway;pattern specification process;regulation of cell size;plant-type cell wall organization;multidimensional cell growth;plant-type cell wall biogenesis;auxin polar transport;cell tip growth;root morphogenesis;regulation of meristem growth;regulation of h…	plasma membrane	protein serine/threonine kinase activity;ATP binding;kinase activity
667	AT5G03190	no_paralog	CPUORF47	1.81	AT-CX:1.00	1/35	CdRAF3	na	mitochondrion	na
668	AT2G40830	no_paralog	RHC1A	1.81	HS-LC:1.00	1/35	CdMEKK9/CdMEKK10	na	cell wall	zinc ion binding
669	AT1G14180	no_paralog	na	1.8	AT-CX:1.00	1/35	CdMEKK13	cytokinesis by cell plate formation;regulation of cell proliferation;petal formation;sepal formation	extracellular region;nucleus	na
670	AT4G29220	AT5G56630	PFK1	1.8	HS-LC:1.00	1/35	CdMEKK9/CdMEKK10	glycolytic process	cytoplasm;cytosol;plasma membrane;6-phosphofructokinase complex	6-phosphofructokinase activity
671	AT4G26270	AT5G56630	PFK3	1.8	HS-LC:1.00	1/35	CdMEKK9/CdMEKK10	glycolytic process;root epidermal cell differentiation	cytoplasm;cytosol;6-phosphofructokinase complex	6-phosphofructokinase activity
672	AT5G56630	AT4G26270 AT4G29220	PFK7	1.8	HS-LC:1.00	1/35	CdMEKK9/CdMEKK10	glycolytic process	cytoplasm;cytosol;6-phosphofructokinase complex	6-phosphofructokinase activity
673	AT3G27870	no_paralog	na	1.8	AT-CX:1.00	1/35	CdRAF12	na	na	ATPase activity, coupled to transmembrane movement of ions, phosphorylative mechanism
674	AT4G27890	AT5G53400	na	1.79	HS-LC:1.00	1/35	CdMEKK9/CdMEKK10	na	cytoplasm	na
675	AT4G38540	no_paralog	na	1.79	AT-CX:1.00	1/35	CdRAF13	toxin catabolic process;response to cyclopentenone;defense response to fungus	mitochondrion	monooxygenase activity
676	AT3G15210	AT1G53170	RAP2.5	1.79	AT-CX:1.00	1/35	CdRAF13	respiratory burst involved in defense response;regulation of transcription, DNA-templated;response to ethylene;response to abscisic acid;induced systemic resistance, jasmonic acid mediated signaling pathway;negative regulation of ethylene-activated signaling pathway;response to chitin;intracellular signal transduction;negative regulation of transcription, DNA-templated	nucleus;nuclear body	DNA binding;sequence-specific DNA binding transcription factor activity;protein binding
677	AT5G13840	no_paralog	FZR3	1.79	AT-CX:1.00	1/35	CdMEKK13	microtubule cytoskeleton organization;cytokinesis by cell plate formation;DNA methylation;chromatin silencing;signal transduction;gamete generation;cell proliferation;gene silencing by RNA;regulation of DNA endoreduplication;DNA endoreduplication;regulation of cell proliferation;proteasome-mediated ubiquitin-dependent protein catabolic process;proteasome assembly;spindle assembly;regulation of ce…	nucleus;heterotrimeric G-protein complex	signal transducer activity;protein binding
678	AT3G13330	no_paralog	PA200	1.79	AT-CX:1.00	1/35	CdRAF13	na	nucleus	na
679	AT4G28770	AT2G20230	na	1.79	AT-CX:1.00	1/35	CdRAF9	calcium ion transport;Golgi organization;response to salt stress	vacuole;vacuolar membrane;membrane	na
680	AT4G05520	no_paralog	EHD2	1.79	AT-CX:1.00	1/35	CdMEKK13	endocytosis	cytoplasm;plasma membrane;plasmodesma;membrane;intracellular membrane-bounded organelle	calcium ion binding
681	AT4G37610	AT5G67480	BT5	1.79	AT-CX:1.00	1/35	CdRAF16/CdRAF30/CdRAF33	regulation of transcription, DNA-templated;response to cold;response to auxin;response to salicylic acid;proximal/distal pattern formation;response to chitin;floral organ abscission;response to hydrogen peroxide;flower morphogenesis	nucleus;cytoplasm	calmodulin binding
682	AT5G63930	no_paralog	na	1.79	AT-PG:1.00	1/35	CdMEKK3/CdMEKK5	response to molecule of bacterial origin;protein phosphorylation;signal transduction;transmembrane receptor protein tyrosine kinase signaling pathway;stomatal complex morphogenesis;stamen development	plasma membrane	protein serine/threonine kinase activity;ATP binding
683	AT1G16460	AT1G79230	STR2	1.79	AT-CX:1.00	1/35	CdRAF6/CdRAF23	aging;embryo development ending in seed dormancy	cytoplasm;mitochondrion;cytosol	thiosulfate sulfurtransferase activity;3-mercaptopyruvate sulfurtransferase activity
684	AT5G21160	no_paralog	LARP1a	1.78	AT-CX:1.00	1/35	CdRAF29/CdRAF35	na	nucleus;cytoplasm;cytosol	na
685	AT1G14120	no_paralog	na	1.78	AT-CX:1.00	1/35	CdZIK1	na	cytoplasm	oxidoreductase activity, acting on paired donors, with incorporation or reduction of molecular oxygen, 2-oxoglutarate as one donor, and incorporation of one atom each of oxygen into both donors
686	AT5G19770	no_paralog	TUA3	1.78	HS-LC:1.00	1/35	CdMEKK9/CdMEKK10	cellular response to gravity	cell wall;cytoplasm;cytosol;plasma membrane;plasmodesma;tubulin complex;apoplast	structural constituent of cytoskeleton
687	AT5G19780	no_paralog	TUA5	1.78	HS-LC:1.00	1/35	CdMEKK9/CdMEKK10	microtubule-based process;response to cadmium ion	cell wall;cytoplasm;cytosol;plasmodesma;membrane;tubulin complex	structural constituent of cytoskeleton
688	AT5G22640	no_paralog	TIC100	1.78	AT-CX:1.00	1/35	CdMEKK13	asymmetric cell division;chloroplast organization;embryo development;embryo development ending in seed dormancy;thylakoid membrane organization;vegetative to reproductive phase transition of meristem;iron-sulfur cluster assembly;protein import into chloroplast stroma;ovule development	cytoplasm;plasma membrane;chloroplast;chloroplast thylakoid membrane;plastid;chloroplast inner membrane;chloroplast envelope	protein binding;protein transporter activity
689	AT3G62050	no_paralog	na	1.78	AT-CX:1.00	1/35	CdMEKK13	na	nucleus	na
690	AT5G52300	no_paralog	RD29B	1.78	AT-CX:1.00	1/35	CdRAF3	response to cold;response to water deprivation;response to salt stress;response to abscisic acid;abscisic acid-activated signaling pathway;leaf senescence	cytoplasm	na
691	AT1G54820	no_paralog	na	1.78	AT-PG:1.00	1/35	CdMEKK3/CdMEKK5	na	plasma membrane	kinase activity
692	AT3G42830	AT5G20570	na	1.77	HS-LC:1.00	1/35	CdRAF8	ubiquitin-dependent protein catabolic process;DNA endoreduplication;proteasome-mediated ubiquitin-dependent protein catabolic process;proteasome assembly;regulation of unidimensional cell growth;response to misfolded protein	ubiquitin ligase complex;nucleus	ubiquitin-protein ligase activity
693	AT3G58720	no_paralog	na	1.77	HS-CX:1.00	1/35	CdMEKK9/CdMEKK10	na	na	zinc ion binding
694	AT3G15380	no_paralog	na	1.77	AT-CX:1.00	1/35	CdMEKK13	na	nucleus;plasma membrane;plasmodesma	na
695	AT3G52920	AT2G36410	na	1.77	AT-CX:1.00	1/35	CdRAF15/CdRAF25	na	nucleus;plasma membrane;chloroplast	na
696	AT3G05790	AT5G26860	LON4	1.77	HS-LC:1.00	1/35	CdMEKK9/CdMEKK10	response to hypoxia;ATP catabolic process;misfolded or incompletely synthesized protein catabolic process;mitochondrion organization;cellular response to oxidative stress;chaperone-mediated protein complex assembly;protein homooligomerization;oxidation-dependent protein catabolic process	mitochondrion;chloroplast;mitochondrial nucleoid	single-stranded DNA binding;single-stranded RNA binding;ATP-dependent peptidase activity;serine-type endopeptidase activity;ATP binding;serine-type peptidase activity;mitochondrial light strand promoter anti-sense binding
697	AT4G33770	no_paralog	ITPK2	1.76	AT-CX:1.00	1/35	CdRAF10/CdRAF17	na	extracellular region	na
698	AT5G10450	AT5G65430	GRF6	1.76	HS-LC:1.00	1/35	CdMEKK9/CdMEKK10	gluconeogenesis;glycolytic process;toxin catabolic process;response to salt stress;brassinosteroid mediated signaling pathway;phosphorylation;regulation of protein localization;defense response to bacterium;response to cadmium ion	cell wall;nucleus;cytoplasm;cytosol;plasma membrane;chloroplast	protein binding;protein phosphorylated amino acid binding
699	AT4G30340	AT2G18730 AT5G57690	DGK7	1.76	AT-PG:1.00	1/35	CdRAF8	protein kinase C-activating G-protein coupled receptor signaling pathway;negative regulation of defense response;root development;leaf development	nucleus;plasma membrane	diacylglycerol kinase activity
700	AT5G61580	no_paralog	PFK4	1.76	HS-LC:1.00	1/35	CdMEKK9/CdMEKK10	glycolytic process	6-phosphofructokinase complex;chloroplast	6-phosphofructokinase activity
701	AT2G34680	no_paralog	AIR9	1.76	AT-CX:1.00	1/35	CdRAF29/CdRAF35	cell adhesion;response to auxin;meristem initiation;trichome morphogenesis;lateral root morphogenesis;cell growth;actin nucleation;regulation of cell differentiation;developmental growth;root hair cell differentiation;cell wall organization	nucleus;plasma membrane;plasmodesma	na
702	AT5G43830	no_paralog	na	1.76	AT-CX:1.00	1/35	CdZIK1	na	nucleus;cytosol	protein binding
703	AT5G67130	no_paralog	na	1.75	AT-CX:1.00	1/35	CdRAF15/CdRAF25	na	plasma membrane;anchored component of plasma membrane	na
704	AT1G02305	no_paralog	na	1.75	AT-CX:1.00	1/35	CdRAF13	proteolysis	extracellular region;vacuole	cysteine-type peptidase activity
705	AT1G64850	no_paralog	na	1.75	AT-CX:1.00	1/35	CdRAF36	na	plastid	calcium ion binding
706	AT5G28740	no_paralog	na	1.75	HS-LC:1.00	1/35	CdZIK1	na	nucleus	na
707	AT3G16830	no_paralog	TPR2	1.75	AT-CX:1.00	1/35	CdRAF2/CdRAF4	microtubule cytoskeleton organization;cytokinesis by cell plate formation;nuclear-transcribed mRNA catabolic process;primary shoot apical meristem specification	nucleus	protein binding
708	AT1G49500	no_paralog	na	1.74	AT-CX:1.00	1/35	CdRAF16/CdRAF30/CdRAF33	tryptophan catabolic process;indoleacetic acid biosynthetic process	na	na
709	AT5G58480	no_paralog	na	1.74	AT-CX:1.00	1/35	CdMEKK13	asymmetric cell division;cytokinin-activated signaling pathway	plasma membrane;anchored component of membrane;anchored component of plasma membrane	hydrolase activity, hydrolyzing O-glycosyl compounds
710	AT4G28390	no_paralog	ATAAC3	1.74	HS-LC:1.00	1/35	CdMEKK9/CdMEKK10	transport;mitochondrial transport;systemic acquired resistance;purine nucleotide transport;response to endoplasmic reticulum stress	mitochondrion;mitochondrial inner membrane;chloroplast envelope;membrane	ATP:ADP antiporter activity
711	AT3G19350	no_paralog	MPC	1.74	AT-CX:1.00	1/35	CdRAF12	regulation of translation	na	poly(A) binding
712	AT2G47240	no_paralog	LACS1	1.74	AT-CX:1.00	1/35	CdMEKK13	long-chain fatty acid metabolic process;fatty acid metabolic process;fatty acid biosynthetic process;systemic acquired resistance;wax biosynthetic process;stomatal complex morphogenesis;cutin biosynthetic process;response to endoplasmic reticulum stress	nucleus;endoplasmic reticulum	long-chain fatty acid-CoA ligase activity;very long-chain fatty acid-CoA ligase activity
713	AT5G40450	no_paralog	na	1.73	AT-CX:1.00	1/35	CdRAF37	protein targeting to membrane;positive regulation of flavonoid biosynthetic process;regulation of plant-type hypersensitive response	nucleus;plasma membrane;chloroplast	na
714	AT2G23760	AT4G36870	SAW2	1.73	AT-CX:1.00	1/35	CdRAF11/CdRAF22/CdRAF34	leaf morphogenesis;organ development	nucleus	DNA binding;sequence-specific DNA binding transcription factor activity
Blue boxes represent those CdMAPKKKs which co-functional genes related to response to cold stress
Red boxes represent those CdMAPKKKs which co-functional genes related to response to heat stress
Purple boxes represent those CdMAPKKKs which co-functional genes related to response to heat and cold stress
