# Supplementary material for: Transcriptome-wide identification of MAPKKK genes in bermudagrass (Cynodon dactylon L.) and their potential roles in low temperature stress responses
Source: PeerJ. 2020 Oct 28;8:e10159. doi: 10.7717/peerj.10159 (PMC7602684; doi:10.7717/peerj.10159)
Supplement: Supplemental Information 10 [file peerj-08-10159-s010.xlsx]

## Sheet: Table S5
Table S5 Log2(Fold change) and P value of each CdMAPKKKs in the low temperature-tolerant bermudagrass WBD-128 under low temperature stress compared with control.
MAPKKKs	Subfamily Gene IDs	Log2(Fold change_24h)	Log2(Fold change_48h)	Log2(Fold change_4h)	p_value_24h	p_value_48h	p_value_4h
CdMAPKKK1	CdMEKK1	0.217087	0.0475967	0.0775953	0.745862	0.946195	0.90745
CdMAPKKK2	CdMEKK2	-0.432447	0.180727	-0.180159	0.538378	0.801305	0.811415
CdMAPKKK3	CdMEKK3	-4.51337	-3.85907	-3.8231	3.12e-09	1.64e-07	1.95e-07
CdMAPKKK4	CdMEKK4	-1.3749	-1.4462	-0.980227	0.0430104	0.033475	0.145163
CdMAPKKK5	CdMEKK5	-2.56608	-2.1983	-2.55069	0.000216099	0.00129664	0.000229633
CdMAPKKK6	CdMEKK6	0.0762962	-0.229099	-0.142473	0.915386	0.740394	0.836552
CdMAPKKK7	CdMEKK7	5.33213	5.96353	6.66133	1.14e-05	2.03e-07	8.07e-09
CdMAPKKK8	CdMEKK8	0.671008	3.88892	3.41081	0.336873	1.95e-07	3.12e-06
CdMAPKKK9	CdMEKK9	0.051575	1.6357	0.414293	0.944365	0.0157241	0.537968
CdMAPKKK10	CdMEKK10	2.33515	-0.37286	2.34091	0.00112928	0.630151	0.00102585
CdMAPKKK11	CdMEKK11	-1.77057	4.41124	3.08854	0.430642	1.64e-06	0.00134785
CdMAPKKK12	CdMEKK12	1.96049	5.64843	4.83246	0.00853174	5.44e-12	9.53e-10
CdMAPKKK13	CdMEKK13	——	5.53694	——	——	0.0465217	——
CdMAPKKK14	CdRAF1	-0.0945096	0.0888592	-0.119333	0.886347	0.892967	0.856262
CdMAPKKK15	CdRAF2	-2.28888	-2.52053	-2.12646	0.00111862	0.000356532	0.0021271
CdMAPKKK16	CdRAF3	0.838245	0.613357	0.346419	0.20446	0.351853	0.598573
CdMAPKKK17	CdRAF4	-1.54355	0.262165	-1.01426	0.02551	0.70104	0.135534
CdMAPKKK18	CdRAF5	-1.72373	-0.972262	-1.77666	0.0106453	0.141791	0.00852446
CdMAPKKK19	CdRAF6	0.254902	0.526328	0.13388	0.704133	0.429195	0.844376
CdMAPKKK20	CdRAF7	-0.70068	-0.293972	-0.450853	0.288481	0.655001	0.493094
CdMAPKKK21	CdRAF8	-0.0823763	0.65155	-0.275996	0.901232	0.323558	0.677795
CdMAPKKK22	CdRAF9	0.473261	0.550798	0.387339	0.474259	0.405164	0.558239
CdMAPKKK23	CdRAF10	-1.40824	-0.691321	-1.17517	0.0349749	0.293576	0.0766041
CdMAPKKK24	CdRAF11	2.27356	1.30672	2.3072	0.0011266	0.0555575	0.000911735
CdMAPKKK25	CdRAF12	-1.49142	-1.09107	-0.580705	0.0554865	0.148109	0.422202
CdMAPKKK26	CdRAF13	-0.975909	-0.611391	-1.08114	0.144079	0.357569	0.105155
CdMAPKKK27	CdRAF14	-1.08175	-1.36804	-1.3346	0.105631	0.0415014	0.0466328
CdMAPKKK28	CdRAF15	-0.372623	-0.190112	-0.500878	0.572218	0.774866	0.449194
CdMAPKKK29	CdRAF16	-1.58722	-2.87018	-1.23403	0.0198218	6.31e-05	0.0667793
CdMAPKKK30	CdRAF17	1.12667	1.35294	1.46942	0.0994427	0.0473061	0.0318178
CdMAPKKK31	CdRAF18	-0.0996474	0.227851	0.0654878	0.891494	0.734722	0.928842
CdMAPKKK32	CdRAF19	-0.250621	-0.333249	-0.405008	0.714635	0.623159	0.550045
CdMAPKKK33	CdRAF20	-0.932744	-1.11449	-0.527697	0.209263	0.131501	0.478209
CdMAPKKK34	CdRAF21	-1.96762	-1.85192	-1.968	0.0039296	0.00641994	0.00387416
CdMAPKKK35	CdRAF22	1.1079	1.1524	1.11797	0.0946758	0.0823567	0.0916693
CdMAPKKK36	CdRAF23	-0.577129	-0.807903	-0.662096	0.39429	0.234588	0.324131
CdMAPKKK37	CdRAF24	0.37407	1.07589	1.26017	0.613601	0.126836	0.0743161
CdMAPKKK38	CdRAF25	-0.570079	-0.307966	-0.56957	0.395449	0.647502	0.39268
CdMAPKKK39	CdRAF26	-0.695287	-0.671066	-0.778241	0.297531	0.315212	0.244684
CdMAPKKK40	CdRAF27	0.110824	-1.14863	0.342716	0.904233	0.302645	0.700163
CdMAPKKK41	CdRAF28	-1.28268	-1.18265	-1.54458	0.0604421	0.0827224	0.0246009
CdMAPKKK42	CdRAF29	-0.545879	-0.374523	-0.512495	0.415981	0.576069	0.442569
CdMAPKKK43	CdRAF30	-1.02792	-1.0038	-0.3508	0.137296	0.148929	0.611944
CdMAPKKK44	CdRAF31	1.87545	2.11021	1.679	0.012201	0.00483221	0.0248332
CdMAPKKK45	CdRAF32	1.13622	0.419434	0.944214	0.0883219	0.528307	0.15498
CdMAPKKK46	CdRAF33	0.79127	1.78458	1.0059	0.256367	0.0104446	0.146842
CdMAPKKK47	CdRAF34	-0.0538964	-0.0454164	-0.195788	0.94331	0.955001	0.774853
CdMAPKKK48	CdRAF35	-1.42382	-1.57327	-1.38431	0.0633408	0.0414441	0.0625484
CdMAPKKK49	CdRAF36	0.344663	0.037002	0.0291287	0.631776	0.972346	0.974544
CdMAPKKK50	CdRAF37	-0.24654	-0.235923	-0.51906	0.70835	0.720966	0.431297
CdMAPKKK51	CdRAF38	4.81789	3.16644	4.94293	3.1e-09	4.74e-05	1.22e-09
CdMAPKKK52	CdZIK1	0.496969	0.982959	0.567338	0.452408	0.139387	0.390871
CdMAPKKK53	CdZIK2	1.36522	0.968432	1.25565	0.0543838	0.170746	0.0726921
CdMAPKKK54	CdZIK3	-0.330375	-0.295621	-0.233841	0.697454	0.721106	0.830176
CdMAPKKK55	CdZIK4	-3.25496	-2.19746	-2.12162	1.13e-05	0.00170143	0.00226153
Red boxes represent fold change ≥ 3.0
Green boxes represent p-value < 0.05
